# Supplementary material for: A Portrait of the Transcriptome of the Neglected Trematode, Fasciola gigantica—Biological and Biotechnological Implications
Source: PLoS Negl Trop Dis. 2011 Feb 1;5(2):e1004. doi: 10.1371/journal.pntd.0001004 (PMC3051338; doi:10.1371/journal.pntd.0001004)
Supplement: Table S1 — Adult Fasciola gigantica transcripts homologous to predicted proteins from other trematodes. (XLSX) [file pntd.0001004.s004.xlsx]

## Sheet: Supplementary_Table_S1
Supplementary Table S1. Adult Fasciola gigantica transcripts homologous to predicted proteins from other trematodesa
Contig	Length (bp)	Mapped reads	RPKMb	Best hit to NCBI non-redundant protein database	Score	%ID	E-value
FG1_Contig19791	1404	7685	955.386	ref|XP_002576909.1| hypothetical protein [Schistosoma mansoni] emb|CAZ33146.1| hypothetical protein [Schistosoma mansoni]	223	56.0538	5e-67
FG1_Contig24160	733	3201	762.226	ref|XP_002581232.1| hypothetical protein [Schistosoma mansoni] emb|CAZ37471.1| hypothetical protein [Schistosoma mansoni]	199	56.2814	3e-59
FG1_Contig14309	687	2513	638.466	ref|XP_002578398.1| ccr4-not transcription complex [Schistosoma mansoni] emb|CAZ34636.1| ccr4-not transcription complex, putative [Schistosoma mansoni]	168	64.2857	3e-57
FG1_6548	520	1759	590.425	emb|CAA06035.1| calcium-binding protein [Fasciola hepatica]	173	91.3295	5e-88
FG1_Contig19977	1015	3321	571.091	emb|CAX74751.1| Mastin precursor [Schistosoma japonicum]	267	65.5431	1e-109
FG1_Contig20856	862	2408	487.586	gb|ACE00520.1| alpha crystallin-containing small heat shock protein variant NtermFhHSP35a [Fasciola hepatica]	204	97.549	1e-112
FG1_Contig6454	638	1400	383.01	gb|ACS94976.1| leucine amino peptidase [Fasciola gigantica]	207	99.0338	1e-113
FG1_Contig7138	555	1169	367.641	emb|CAA12644.1| protein disulphide isomerase [Fasciola hepatica]	90	98.8889	1e-45
FG1_Contig21705	626	1093	304.753	ref|XP_002577272.1| hypothetical protein [Schistosoma mansoni] emb|CAZ33509.1| hypothetical protein [Schistosoma mansoni]	190	43.1579	3e-35
FG1_Contig17346	943	1594	295.039	ref|XP_002578722.1| hypothetical protein [Schistosoma mansoni] emb|CAZ34960.1| expressed protein [Schistosoma mansoni]	298	35.5705	2e-45
FG1_Contig21802	556	853	267.779	emb|CAX71449.1| hypothetical protein [Schistosoma japonicum]	172	47.6744	2e-33
FG1_Contig12653	363	555	266.863	emb|CAX75601.1| Heterogeneous nuclear ribonucleoprotein H' [Schistosoma japonicum]	119	68.0672	4e-37
FG1_Contig19558	833	1228	257.309	gb|ABZ82044.1| tegumental calcium-binding EF-hand protein [Clonorchis sinensis]	181	57.4586	5e-57
FG1_Contig7294	326	470	251.642	emb|CAP72047.1| tubulin alpha-4 [Fasciola hepatica]	82	97.561	1e-42
FG1_Contig17738	1606	2125	230.949	ref|XP_002574258.1| hypothetical protein [Schistosoma mansoni] emb|CAZ30491.1| conserved hypothetical protein [Schistosoma mansoni]	293	76.4505	1e-130
FG1_Contig5980	630	781	216.378	ref|XP_002579419.1| hypothetical protein [Schistosoma mansoni] emb|CAZ35658.1| expressed protein [Schistosoma mansoni]	156	44.2308	5e-32
FG1_Contig23752	986	1198	212.071	ref|XP_002572046.1| aquaporin-3 [Schistosoma mansoni] emb|CAZ28276.1| aquaporin-3, putative [Schistosoma mansoni]	189	38.6243	1e-33
FG1_Contig20539	2089	2413	201.614	ref|XP_002577835.1| hypothetical protein [Schistosoma mansoni] emb|CAZ34073.1| hypothetical protein [Schistosoma mansoni]	436	35.3211	7e-75
FG1_Contig34889	1442	1639	198.388	gb|AAW26644.1| SJCHGC06249 protein [Schistosoma japonicum] emb|CAX69316.1| complement inhibitory receptor [Schistosoma japonicum]	219	51.1416	2e-58
FG1_Contig11817	831	938	197.017	gb|ACE06893.1| unknown [Schistosoma japonicum] emb|CAX70003.1| hypothetical protein [Schistosoma japonicum] emb|CAX70274.1| hypothetical protein [Schistosoma japonicum] emb|CAX74851.1| hypothetical protein [Schistosoma japonicum] emb|CAX74852.1| hypothetical protein [Schistosoma japonicum] emb|CAX74853.1| hypothetical protein [Schistosoma japonicum]	215	63.7209	2e-74
FG1_Contig8338	1042	1146	191.964	emb|CAX77155.1| Heterogeneous nuclear ribonucleoprotein K [Schistosoma japonicum]	174	73.5632	5e-66
FG1_Contig23761	370	403	190.11	emb|CAX71175.1| putative Stress-induced-phosphoprotein 1 [Schistosoma japonicum]	98	65.3061	3e-33
FG1_Contig26679	1896	1991	183.289	ref|XP_002580640.1| hypothetical protein [Schistosoma mansoni] emb|CAZ36879.1| hypothetical protein [Schistosoma mansoni]	494	45.5466	1e-103
FG1_Contig24265	1187	1219	179.248	gb|ACE00520.1| alpha crystallin-containing small heat shock protein variant NtermFhHSP35a [Fasciola hepatica]	331	52.2659	1e-101
FG1_Contig23327	1340	1375	179.102	ref|XP_002574984.1| hypothetical protein [Schistosoma mansoni] emb|CAZ31217.1| hypothetical protein [Schistosoma mansoni]	453	42.8256	1e-101
FG1_Contig22878	633	602	165.995	ref|XP_002575657.1| universal stress protein [Schistosoma mansoni] emb|CAZ31890.1| universal stress protein, putative [Schistosoma mansoni]	151	64.9007	4e-58
FG1_Contig20690	954	836	152.954	ref|XP_002569742.1| hypothetical protein [Schistosoma mansoni] emb|CAY17033.1| conserved hypothetical protein [Schistosoma mansoni]	259	33.2046	4e-34
FG1_Contig26908	743	608	142.829	ref|XP_002572552.1| phosphoprotein [Schistosoma mansoni] emb|CAZ28784.1| Acidic leucine-rich nuclear phosphoprotein 32-related protein (ANP32/acidic nuclear phosphoprotein-like protein) [Schistosoma mansoni]	155	56.129	7e-43
FG1_Contig20694	2624	2066	137.426	gb|AAP06267.2| SJCHGC05607 protein [Schistosoma japonicum]	416	45.4327	1e-105
FG1_Contig15394	3699	2869	135.378	ref|XP_002577780.1| hypothetical protein [Schistosoma mansoni] emb|CAZ34018.1| expressed protein [Schistosoma mansoni]	789	34.7275	1e-112
FG1_Contig16499	963	717	129.956	emb|CAX73466.1| Ezrin-radixin-moesin-binding phosphoprotein 50 [Schistosoma japonicum]	120	58.3333	3e-32
FG1_Contig23903	1927	1375	124.544	ref|XP_002577451.1| hypothetical protein [Schistosoma mansoni] emb|CAZ33689.1| hypothetical protein [Schistosoma mansoni]	539	30.9833	1e-82
FG1_Contig17645	756	482	111.283	ref|XP_002575009.1| oxalate:formate antiporter [Schistosoma mansoni] emb|CAZ31242.1| oxalate:formate antiporter, putative [Schistosoma mansoni]	223	57.3991	3e-69
FG1_Contig22382	937	592	110.277	ref|XP_002572005.1| calcium-binding protein [Schistosoma mansoni] emb|CAZ28235.1| calcium-binding protein, putative [Schistosoma mansoni]	162	93.2099	5e-83
FG1_Contig13016	730	443	105.921	gb|AAP06272.1| similar to GenBank Accession Number U86673 tegumental antigen Sm20 [Schistosoma japonicum] emb|CAX70791.1| Tegument antigen (I(H)A) [Schistosoma japonicum] emb|CAX70793.1| Tegument antigen (I(H)A) [Schistosoma japonicum] emb|CAX70794.1| Tegument antigen (I(H)A) [Schistosoma japonicum] emb|CAX70795.1| Tegument antigen (I(H)A) [Schistosoma japonicum] emb|CAX75882.1| Tegument antigen …	177	45.7627	4e-38
FG1_Contig25702	907	527	101.416	gb|AAX27224.2| SJCHGC06533 protein [Schistosoma japonicum]	94	82.9787	2e-35
FG1_Contig15856	725	417	100.392	ref|XP_002574984.1| hypothetical protein [Schistosoma mansoni] emb|CAZ31217.1| hypothetical protein [Schistosoma mansoni]	192	47.3958	1e-38
FG1_Contig9418	4157	2277	95.606	ref|XP_002575888.1| hypothetical protein [Schistosoma mansoni] emb|CAZ32123.1| expressed protein [Schistosoma mansoni]	1283	49.7272	0
FG1_Contig18389	2627	1423	94.5469	ref|XP_002578120.1| hypothetical protein [Schistosoma mansoni] emb|CAZ34358.1| hypothetical protein [Schistosoma mansoni]	413	32.2034	3e-42
FG1_Contig24352	412	215	91.0843	ref|XP_002579537.1| hypothetical protein [Schistosoma mansoni] emb|CAZ35776.1| hypothetical protein [Schistosoma mansoni]	132	58.3333	3e-35
FG1_Contig16822	966	491	88.717	ref|XP_002572289.1| hypothetical protein [Schistosoma mansoni] emb|CAZ28520.1| WD40-repeat containing protein [Schistosoma mansoni]	328	37.8049	5e-60
FG1_Contig22040	1028	498	84.5549	emb|CAA06036.1| calcium-binding protein [Fasciola hepatica]	185	50.2703	1e-47
FG1_Contig18486	998	472	82.5494	ref|XP_002579537.1| hypothetical protein [Schistosoma mansoni] emb|CAZ35776.1| hypothetical protein [Schistosoma mansoni]	330	59.697	1e-119
FG1_Contig26336	7815	3635	81.1854	ref|XP_002569845.1| erythrocyte membrane protein [Schistosoma mansoni] emb|CAY17273.1| erythrocyte membrane protein, putative [Schistosoma mansoni]	1167	26.2211	2e-68
FG1_Contig20632	3307	1521	80.2781	ref|XP_002580291.1| cement precursor protein 3B variant 3 [Schistosoma mansoni] emb|CAZ36530.1| cement precursor protein 3B variant 3, putative [Schistosoma mansoni]	710	37.1831	5e-93
FG1_Contig16256	1189	542	79.5646	ref|XP_002579230.1| acidic fibroblast growth factor intracellular binding protein [Schistosoma mansoni] emb|CAZ35469.1| acidic fibroblast growth factor intracellular binding protein, putative [Schistosoma mansoni]	327	41.2844	3e-81
FG1_Contig19243	1713	780	79.4766	ref|XP_002569908.1| hypothetical protein [Schistosoma mansoni] emb|CAY17406.1| expressed protein [Schistosoma mansoni]	560	40.1786	3e-92
FG1_Contig23141	376	169	78.4515	ref|XP_002575519.1| boule-related [Schistosoma mansoni] emb|CAZ31752.1| boule-related [Schistosoma mansoni]	125	80	3e-48
FG1_Contig19242	1711	753	76.8152	emb|CAX74570.1| WD repeat protein 53 [Schistosoma japonicum]	419	47.9714	1e-103
FG1_Contig26382	1018	435	74.5837	gb|AAW26655.1| SJCHGC01943 protein [Schistosoma japonicum]	258	39.5349	6e-43
FG1_Contig21921	1770	756	74.5505	emb|CAX73200.1| hypothetical protein [Schistosoma japonicum]	460	45.6522	1e-109
FG1_Contig19409	8162	3364	71.9386	ref|XP_002575948.1| hypothetical protein [Schistosoma mansoni] emb|CAZ32183.1| expressed protein [Schistosoma mansoni]	1519	37.9197	0
FG1_Contig18831	1192	491	71.8965	gb|AAX27232.2| SJCHGC02553 protein [Schistosoma japonicum]	241	46.473	5e-46
FG1_Contig30642	1419	552	67.8983	ref|XP_002578517.1| hypothetical protein [Schistosoma mansoni] emb|CAZ34755.1| expressed protein [Schistosoma mansoni]	456	57.8947	2.33e-156
FG1_Contig19209	3346	1279	66.7186	ref|XP_002572461.1| hypothetical protein [Schistosoma mansoni] emb|CAZ28692.1| expressed protein [Schistosoma mansoni]	982	39.3075	1e-167
FG1_Contig18934	1269	481	66.1585	gb|AAS19361.1| egg antigen [Paragonimus westermani]	330	42.7273	5e-61
FG1_Contig20371	2122	801	65.8854	ref|XP_002577374.1| homeobox protein [Schistosoma mansoni] emb|CAZ33612.1| homeobox protein, putative [Schistosoma mansoni]	615	48.2927	0
FG1_Contig23190	1095	412	65.6728	ref|XP_002571484.1| fusion [Schistosoma mansoni] emb|CAZ27708.1| fusion [Schistosoma mansoni]	311	72.6688	1e-122
FG1_Contig23301	608	221	63.4441	emb|CAX76368.1| Proteasome maturation factor UMP1 domain-containing protein [Schistosoma japonicum]	149	59.7315	4e-45
FG1_Contig19024	2208	793	62.6868	ref|XP_002572968.1| cell polarity protein [Schistosoma mansoni] emb|CAZ29200.1| Crumbs complex protein; cell polarity protein; family S9 non-peptidase homologue (S09 family) [Schistosoma mansoni]	215	66.0465	3e-75
FG1_Contig18905	1249	435	60.7896	gb|AAW26769.1| SJCHGC09380 protein [Schistosoma japonicum]	415	77.5904	0
FG1_Contig4658	488	168	60.0886	gb|AAW26750.1| unknown [Schistosoma japonicum]	89	83.1461	3e-38
FG1_Contig20890	2225	765	60.0114	ref|XP_002577015.1| hypothetical protein [Schistosoma mansoni] emb|CAZ33252.1| hypothetical protein [Schistosoma mansoni]	671	42.772	1e-127
FG1_Contig9564	275	93	59.0273	ref|XP_002576432.1| tar DNA-binding protein [Schistosoma mansoni] emb|CAZ32669.1| tar DNA-binding protein, putative [Schistosoma mansoni]	80	75	3e-30
FG1_Contig25881	1185	398	58.6229	gb|AAP06333.1| similar to GenBank Accession Number AE003799 CG5174 gene product in Drosophila melanogaster [Schistosoma japonicum]	239	41.4226	3e-38
FG1_Contig25256	5026	1652	57.3707	ref|XP_002573742.1| hypothetical protein [Schistosoma mansoni] emb|CAZ29974.1| expressed protein [Schistosoma mansoni]	1681	39.2623	0
FG1_Contig19206	1709	553	56.4788	ref|XP_002575142.1| talin [Schistosoma mansoni] emb|CAZ31375.1| talin, putative [Schistosoma mansoni]	302	47.0199	5e-54
FG1_Contig26845	1828	569	54.3298	ref|XP_002580061.1| Ribosome-binding protein 1 (Ribosome receptor protein) (mRRp) [Schistosoma mansoni] emb|CAZ36300.1| Ribosome-binding protein 1 (Ribosome receptor protein) (mRRp), putative [Schistosoma mansoni]	577	72.7903	0
FG1_Contig22975	2325	716	53.7517	ref|XP_002577369.1| egf-like domain protein [Schistosoma mansoni] emb|CAZ33607.1| egf-like domain protein [Schistosoma mansoni]	584	56.3356	0
FG1_Contig25385	1523	461	52.8328	emb|CAX70261.1| nervana 2 [Schistosoma japonicum]	145	56.5517	8e-45
FG1_Contig19010	1336	404	52.781	ref|XP_002576500.1| hypothetical protein [Schistosoma mansoni] emb|CAZ32737.1| expressed protein [Schistosoma mansoni]	359	71.0306	1e-147
FG1_Contig26398	926	276	52.0236	emb|CAX69642.1| Polycystic kidney and hepatic disease 1 precursor [Schistosoma japonicum]	274	42.3358	9e-53
FG1_Contig21815	1868	555	51.8583	ref|XP_002573526.1| ankyrin repeat-containing [Schistosoma mansoni] emb|CAZ29758.1| ankyrin repeat-containing, putative [Schistosoma mansoni]	326	51.5337	6e-93
FG1_Contig23542	1538	435	49.3668	ref|XP_002579649.1| macrophage scavenger receptor-related [Schistosoma mansoni] emb|CAZ35888.1| macrophage scavenger receptor-related [Schistosoma mansoni]	395	56.962	1e-133
FG1_Contig29903	761	208	47.7069	ref|XP_002573830.1| hypothetical protein [Schistosoma mansoni] emb|CAZ30063.1| expressed protein [Schistosoma mansoni]	161	53.4161	7e-36
FG1_Contig16351	576	157	47.5751	emb|CAX72653.1| oxalate/formate antiporter [Schistosoma japonicum]	170	63.5294	3e-59
FG1_Contig15839	533	145	47.4835	gb|AAW27242.1| SJCHGC08717 protein [Schistosoma japonicum]	166	69.2771	6e-59
FG1_Contig29415	617	167	47.2426	ref|XP_002577731.1| survival motor neuron protein [Schistosoma mansoni] emb|CAZ33969.1| survival motor neuron protein, putative [Schistosoma mansoni]	106	64.1509	4e-30
FG1_Contig23560	724	192	46.2876	ref|XP_002580112.1| pseudouridylate synthase [Schistosoma mansoni] emb|CAZ36351.1| pseudouridylate synthase, putative [Schistosoma mansoni]	240	54.1667	6e-66
FG1_Contig22512	761	194	44.4958	ref|XP_002569900.1| tegumental protein Sm 20.8 [Schistosoma mansoni] gb|AAC79130.1| tegumental antigen Sm20.8 [Schistosoma mansoni] gb|AAB62067.1| Sm 20.8 [Schistosoma mansoni] gb|AAC79131.1| tegumental protein Sm 20.8 [Schistosoma mansoni] emb|CAY17384.1| tegumental protein Sm 20.8, putative [Schistosoma mansoni]	175	42.2857	8e-35
FG1_Contig30213	690	174	44.0152	ref|XP_002571822.1| hypothetical protein [Schistosoma mansoni] emb|CAZ28052.1| expressed protein [Schistosoma mansoni]	151	61.5894	3e-50
FG1_Contig24030	1955	490	43.7473	ref|XP_002576770.1| related to multifunctional cyclin-dependent kinase-related [Schistosoma mansoni] emb|CAZ33007.1| related to multifunctional cyclin-dependent kinase-related [Schistosoma mansoni]	531	42.5612	1e-112
FG1_Contig27243	2417	597	43.1122	ref|XP_002575812.1| hypothetical protein [Schistosoma mansoni] emb|CAZ32047.1| expressed protein [Schistosoma mansoni]	494	32.5911	2e-40
FG1_Contig31637	1025	249	42.4012	ref|XP_002580446.1| aminopeptidase PILS (M01 family) [Schistosoma mansoni] emb|CAZ36685.1| aminopeptidase PILS (M01 family) [Schistosoma mansoni]	299	51.8395	1e-79
FG1_Contig14952	1478	358	42.2777	ref|XP_002572458.1| AMP-activated protein kinase gamma regulatory subunit [Schistosoma mansoni] emb|CAZ28689.1| AMP-activated protein kinase, gamma regulatory subunit, putative [Schistosoma mansoni]	113	67.2566	9e-39
FG1_Contig21452	1306	313	41.8315	gb|AAK35217.1| unknown [Paragonimus westermani]	321	38.0062	1e-48
FG1_Contig20401	1073	251	40.8297	emb|CAX74326.1| hypothetical protein [Schistosoma japonicum]	240	59.5833	1e-82
FG1_Contig34906	1058	247	40.7487	ref|XP_002578001.1| uracil-DNA glycosylase [Schistosoma mansoni] emb|CAZ34239.1| uracil-DNA glycosylase, putative [Schistosoma mansoni]	330	37.5758	3e-54
FG1_Contig22167	1399	324	40.4231	emb|CAX70015.1| Transmembrane protein 11 [Schistosoma japonicum]	261	54.4061	6e-71
FG1_Contig18847	1654	382	40.3116	ref|XP_002569842.1| hypothetical protein [Schistosoma mansoni] emb|CAY17267.1| expressed protein [Schistosoma mansoni]	297	70.3704	1e-121
FG1_Contig21933	1133	259	39.8999	ref|XP_002580601.1| hypothetical protein [Schistosoma mansoni] emb|CAZ36840.1| expressed protein [Schistosoma mansoni]	292	75	1e-131
FG1_Contig17801	789	179	39.5985	ref|XP_002580875.1| hypothetical protein [Schistosoma mansoni] emb|CAZ37114.1| expressed protein [Schistosoma mansoni]	122	72.9508	7e-50
FG1_Contig18861	1222	275	39.2793	ref|XP_002576254.1| hypothetical protein [Schistosoma mansoni] emb|CAZ32490.1| expressed protein [Schistosoma mansoni]	156	83.9744	3e-70
FG1_Contig18457	989	222	39.1795	ref|XP_002579974.1| vinculin [Schistosoma mansoni] emb|CAZ36213.1| vinculin, putative [Schistosoma mansoni]	330	56.3636	5e-94
FG1_Contig22368	1306	292	39.0249	ref|XP_002572593.1| hypothetical protein [Schistosoma mansoni] emb|CAZ28825.1| expressed protein [Schistosoma mansoni]	197	45.6853	2e-45
FG1_Contig18641	1065	236	38.6781	ref|XP_002573075.1| hypothetical protein [Schistosoma mansoni] emb|CAZ29307.1| expressed protein [Schistosoma mansoni]	238	48.7395	6e-54
FG1_Contig19345	2174	481	38.6178	ref|XP_002576515.1| monocarboxylate transporter [Schistosoma mansoni] emb|CAZ32752.1| monocarboxylate transporter, putative [Schistosoma mansoni]	703	33.7127	1e-91
FG1_Contig9031	656	143	38.0482	ref|XP_002581055.1| hypothetical protein [Schistosoma mansoni] emb|CAZ37294.1| expressed protein [Schistosoma mansoni]	203	52.2167	1e-52
FG1_Contig16356	576	123	37.2722	ref|XP_002577564.1| nuclear transcription factor X-box binding 1 (nfx1) [Schistosoma mansoni] emb|CAZ33802.1| nuclear transcription factor, X-box binding 1 (nfx1), putative [Schistosoma mansoni]	163	42.9448	1e-33
FG1_Contig18630	1051	221	36.7022	ref|XP_002577690.1| hypothetical protein [Schistosoma mansoni] emb|CAZ33928.1| expressed protein [Schistosoma mansoni]	264	50.3788	5e-60
FG1_Contig12060	452	94	36.2988	gb|AAX27732.2| SJCHGC05922 protein [Schistosoma japonicum]	10	80	1e-43
FG1_Contig24928	1727	353	35.6767	ref|XP_002572902.1| sodium-dependent neurotransmitter transporter [Schistosoma mansoni] emb|CAZ29134.1| sodium-dependent neurotransmitter transporter, putative [Schistosoma mansoni]	418	71.5311	1e-174
FG1_Contig16449	1035	209	35.2459	ref|XP_002571965.1| cbl [Schistosoma mansoni] emb|CAZ28195.1| cbl, putative [Schistosoma mansoni]	73	79.4521	2e-30
FG1_Contig24867	798	161	35.2148	ref|XP_002577356.1| glycosyltransferase 14 family member [Schistosoma mansoni] emb|CAZ33594.1| glycosyltransferase 14 family member, putative [Schistosoma mansoni]	151	54.9669	2e-40
FG1_Contig19004	1332	266	34.8562	ref|XP_002570047.1| ABC transporter [Schistosoma mansoni] emb|CAY17675.1| ABC transporter, putative [Schistosoma mansoni]	314	54.1401	4e-76
FG1_Contig20244	1322	264	34.8558	ref|XP_002577077.1| protoheme IX farnesyltransferase [Schistosoma mansoni] emb|CAZ33314.1| protoheme IX farnesyltransferase, putative [Schistosoma mansoni]	182	45.0549	7e-32
FG1_Contig24320	954	189	34.5793	gb|AAX27317.2| SJCHGC04629 protein [Schistosoma japonicum]	209	53.5885	4e-62
FG1_Contig15320	494	97	34.2726	ref|XP_002571781.1| Collagen alpha-1(V) chain precursor [Schistosoma mansoni] emb|CAZ28011.1| Collagen alpha-1(V) chain precursor, putative [Schistosoma mansoni]	164	54.2683	4e-45
FG1_Contig18862	2340	457	34.0881	emb|CAX72743.1| putative leucine-rich repeats containing F-box protein FBL3 [Schistosoma japonicum]	352	70.7386	1e-136
FG1_Contig18603	1038	202	33.9669	ref|XP_002579127.1| retinaldehyde binding protein-related [Schistosoma mansoni] emb|CAZ35366.1| retinaldehyde binding protein-related [Schistosoma mansoni]	315	42.2222	2e-68
FG1_Contig23837	981	190	33.8055	emb|CAX69490.1| cyclin B1 interacting protein 1 [Schistosoma japonicum]	283	47.7032	2e-71
FG1_Contig341	305	59	33.764	ref|XP_002574115.1| programmed cell death protein [Schistosoma mansoni] emb|CAZ30348.1| programmed cell death protein, putative [Schistosoma mansoni]	97	69.0722	2e-33
FG1_Contig17779	1372	262	33.3311	gb|AAX26817.2| SJCHGC04448 protein [Schistosoma japonicum]	129	81.3953	1e-55
FG1_Contig21661	718	137	33.3042	ref|XP_002577829.1| hypothetical protein [Schistosoma mansoni] emb|CAZ34067.1| expressed protein [Schistosoma mansoni]	239	40.1674	4e-54
FG1_Contig23685	510	97	33.1974	ref|XP_002572828.1| tyrosinase precursor [Schistosoma mansoni] gb|AAW21822.1| tyrosinase 2 precursor [Schistosoma mansoni] emb|CAZ29060.1| tyrosinase precursor [Schistosoma mansoni]	151	64.2384	8e-59
FG1_Contig13931	417	79	33.0669	ref|XP_002573943.1| ccr4 not-related [Schistosoma mansoni] emb|CAZ30176.1| ccr4 not-related [Schistosoma mansoni]	102	80.3922	3e-43
FG1_Contig26667	264	50	33.0574	ref|XP_002579974.1| vinculin [Schistosoma mansoni] emb|CAZ36213.1| vinculin, putative [Schistosoma mansoni]	88	79.5455	7e-31
FG1_Contig27723	766	145	33.0401	gb|AAW25706.1| SJCHGC02386 protein [Schistosoma japonicum]	188	45.2128	2e-35
FG1_Contig28718	630	118	32.6922	emb|CAX74883.1| hypotherical protein [Schistosoma japonicum]	177	71.1864	4e-73
FG1_Contig27838	392	72	32.0589	emb|CAX77260.1| carbonyl reductase 1 [Schistosoma japonicum]	94	70.2128	1e-34
FG1_Contig18516	1008	185	32.0342	ref|XP_002576254.1| hypothetical protein [Schistosoma mansoni] emb|CAZ32490.1| expressed protein [Schistosoma mansoni]	396	34.8485	6e-51
FG1_Contig26167	1578	288	31.8557	ref|XP_002575294.1| trim56 protein [Schistosoma mansoni] emb|CAZ31527.1| trim56 protein, putative [Schistosoma mansoni]	484	44.2149	1e-113
FG1_Contig17823	806	147	31.8335	ref|XP_002573453.1| parkin (ubiquitin E3 ligase prkn) [Schistosoma mansoni] emb|CAZ29685.1| parkin (ubiquitin E3 ligase prkn), putative [Schistosoma mansoni]	245	43.2653	2e-59
FG1_Contig23483	773	140	31.6119	ref|XP_002574994.1| hypothetical protein [Schistosoma mansoni] emb|CAZ31227.1| hypothetical protein [Schistosoma mansoni]	202	38.1188	2e-30
FG1_Contig30844	1499	269	31.3222	ref|XP_002569979.1| hypothetical protein [Schistosoma mansoni] emb|CAY17542.1| mucin-like protein [Schistosoma mansoni]	444	55.4054	1e-117
FG1_Contig18863	3018	541	31.2882	ref|XP_002569948.1| rgs-gaip interacting protein gipc [Schistosoma mansoni] emb|CAY17481.1| rgs-gaip interacting protein gipc, putative [Schistosoma mansoni]	202	48.0198	8e-41
FG1_Contig11060	314	56	31.1287	gb|AAX26847.2| SJCHGC04221 protein [Schistosoma japonicum]	104	72.1154	2e-40
FG1_Contig34648	699	122	30.4639	ref|XP_002575992.1| formin binding protein and related proteins [Schistosoma mansoni] emb|CAZ32227.1| formin binding protein and related proteins [Schistosoma mansoni]	231	60.6061	4e-77
FG1_Contig26129	434	75	30.163	ref|XP_002579127.1| retinaldehyde binding protein-related [Schistosoma mansoni] emb|CAZ35366.1| retinaldehyde binding protein-related [Schistosoma mansoni]	115	59.1304	2e-36
FG1_Contig18001	873	150	29.9902	ref|XP_002578542.1| hypothetical protein [Schistosoma mansoni] emb|CAZ34780.1| expressed protein [Schistosoma mansoni]	300	56.6667	8e-88
FG1_Contig19344	2161	369	29.804	ref|XP_002579760.1| zinc finger protein [Schistosoma mansoni] emb|CAZ35999.1| zinc finger protein, putative [Schistosoma mansoni]	734	56.5395	0
FG1_Contig25432	1144	195	29.7516	emb|CAX74259.1| Cell division cycle and apoptosis regulator protein 1 [Schistosoma japonicum]	377	52.5199	1e-102
FG1_Contig33998	883	150	29.6506	ref|XP_002574321.1| drug transporter [Schistosoma mansoni] emb|CAZ30554.1| drug transporter, putative [Schistosoma mansoni]	294	65.6463	1e-100
FG1_Contig15009	474	80	29.4587	ref|XP_002577307.1| protein kinase [Schistosoma mansoni] emb|CAZ33544.1| protein kinase [Schistosoma mansoni]	117	71.7949	9e-44
FG1_Contig20904	604	101	29.1868	ref|XP_002571647.1| centaurin alpha [Schistosoma mansoni] emb|CAZ27877.1| centaurin alpha, putative [Schistosoma mansoni]	169	65.0888	6e-65
FG1_Contig23091	633	102	28.1254	ref|XP_002570135.1| metaxin [Schistosoma mansoni] emb|CAY17875.1| metaxin, putative [Schistosoma mansoni]	204	51.9608	1e-56
FG1_Contig18985	1313	211	28.0492	ref|XP_002569882.1| hypothetical protein [Schistosoma mansoni] emb|CAY17345.1| expressed protein [Schistosoma mansoni]	309	64.7249	1e-102
FG1_Contig33220	349	56	28.0069	ref|XP_002576984.1| ribonuclease pH related [Schistosoma mansoni] emb|CAZ33221.1| ribonuclease pH related [Schistosoma mansoni]	105	61.9048	1e-32
FG1_Contig15422	501	80	27.8711	ref|XP_002575510.1| non-receptor protein-tyrosine phosphatase [Schistosoma mansoni] emb|CAZ31743.1| non-receptor protein-tyrosine phosphatase, putative [Schistosoma mansoni]	136	57.3529	8e-35
FG1_Contig15123	486	77	27.6539	gb|AAX26489.2| SJCHGC08494 protein [Schistosoma japonicum]	129	79.845	1e-57
FG1_Contig16403	581	92	27.6385	ref|XP_002574796.1| carbonyl reductase [Schistosoma mansoni] emb|CAZ31029.1| carbonyl reductase, putative [Schistosoma mansoni]	175	61.1429	6e-53
FG1_Contig30383	1266	199	27.4361	ref|XP_002570493.1| ribosomal protein related [Schistosoma mansoni] emb|CAY18019.1| ribosomal protein related [Schistosoma mansoni]	101	76.2376	9e-36
FG1_Contig34610	440	69	27.3715	ref|XP_002578473.1| hypothetical protein [Schistosoma mansoni] emb|CAZ34711.1| expressed protein [Schistosoma mansoni]	150	61.3333	6e-43
FG1_Contig18990	1322	207	27.3301	gb|AAX26178.2| SJCHGC09009 protein [Schistosoma japonicum]	260	37.6923	6e-41
FG1_Contig19022	1348	210	27.1914	ref|XP_002573075.1| hypothetical protein [Schistosoma mansoni] emb|CAZ29307.1| expressed protein [Schistosoma mansoni]	421	41.3302	5e-69
FG1_Contig17855	802	124	26.9867	gb|AAW26964.1| SJCHGC00659 protein [Schistosoma japonicum]	115	56.5217	2e-32
FG1_Contig16813	628	96	26.6817	ref|XP_002572353.1| RNA binding protein [Schistosoma mansoni] emb|CAZ28584.1| RNA binding protein, putative [Schistosoma mansoni]	208	75.9615	1e-83
FG1_Contig17031	656	100	26.6072	ref|XP_002579263.1| ubiquitin-activating enzyme E1b [Schistosoma mansoni] emb|CAZ35502.1| ubiquitin-activating enzyme E1b, putative [Schistosoma mansoni]	208	49.0385	8e-45
FG1_Contig28210	506	77	26.5609	ref|XP_002572300.1| hypothetical protein [Schistosoma mansoni] emb|CAZ28531.1| expressed protein [Schistosoma mansoni]	152	76.3158	3e-61
FG1_Contig23038	447	68	26.5524	ref|XP_002575226.1| cactin-related [Schistosoma mansoni] emb|CAZ31459.1| cactin-related [Schistosoma mansoni]	139	82.7338	9e-58
FG1_Contig16321	573	87	26.5013	emb|CAX73132.1| Calcium-binding EF-hand,domain-containing protein [Schistosoma japonicum]	163	39.2638	4e-31
FG1_Contig17538	733	111	26.4315	ref|XP_002580343.1| tyrosine kinase [Schistosoma mansoni] emb|CAZ36582.1| tyrosine kinase [Schistosoma mansoni]	211	44.0758	5e-49
FG1_Contig18819	1185	179	26.3656	ref|XP_002570063.1| neurotracting/lsamp/neurotrimin/obcam related cell adhesion molecule [Schistosoma mansoni] emb|CAY17707.1| neurotracting/lsamp/neurotrimin/obcam related cell adhesion molecule [Schistosoma mansoni]	364	87.0879	0
FG1_Contig21563	544	82	26.3098	ref|XP_002572283.1| tensin [Schistosoma mansoni] emb|CAZ28514.1| tensin, putative [Schistosoma mansoni]	146	56.8493	6e-41
FG1_Contig23868	948	140	25.7764	emb|CAX73141.1| Cyclin-T2 [Schistosoma japonicum]	311	63.6656	1e-102
FG1_Contig17792	787	113	25.0614	ref|XP_002575975.1| bystin [Schistosoma mansoni] emb|CAZ32210.1| bystin, putative [Schistosoma mansoni]	263	56.654	5e-78
FG1_Contig13153	382	54	24.6736	ref|XP_002578141.1| atpase class VI type 11c [Schistosoma mansoni] emb|CAZ34379.1| atpase, class VI, type 11c, putative [Schistosoma mansoni]	117	59.8291	1e-34
FG1_Contig8291	248	35	24.6331	ref|XP_002578443.1| eukaryotic translation initiation factor 3 subunit (eif-3) [Schistosoma mansoni] emb|CAZ34681.1| eukaryotic translation initiation factor 3 subunit (eif-3), putative [Schistosoma mansoni]	79	87.3418	2e-35
FG1_Contig27647	499	70	24.485	ref|XP_002576021.1| cleavage stimulation factor [Schistosoma mansoni] emb|CAZ32256.1| cleavage stimulation factor, putative [Schistosoma mansoni]	168	66.6667	4e-58
FG1_Contig12728	366	51	24.3216	ref|XP_002571151.1| hypothetical protein [Schistosoma mansoni] emb|CAZ38836.1| hypothetical protein [Schistosoma mansoni]	116	67.2414	2e-38
FG1_Contig16548	952	132	24.2013	ref|XP_002577578.1| hypothetical protein [Schistosoma mansoni] emb|CAZ33816.1| expressed protein [Schistosoma mansoni]	106	76.4151	1e-35
FG1_114020	315	43	23.8265	ref|XP_002579958.1| multidrug resistance protein [Schistosoma mansoni] emb|CAZ36197.1| multidrug resistance protein 1, 2, 3 (p glycoprotein 1, 2, 3), putative [Schistosoma mansoni]	103	75.7282	2e-40
FG1_Contig30032	624	85	23.7759	ref|XP_002575156.1| fkbp-rapamycin associated protein [Schistosoma mansoni] emb|CAZ31389.1| fkbp-rapamycin associated protein, putative [Schistosoma mansoni]	209	53.11	4e-51
FG1_Contig34121	239	32	23.3698	ref|XP_002572646.1| serine/threonine protein kinase [Schistosoma mansoni] emb|CAZ28878.1| serine/threonine kinase [Schistosoma mansoni]	79	73.4177	7e-31
FG1_Contig16100	554	74	23.3144	emb|CAX73751.1| lamin B receptor [Schistosoma japonicum] emb|CAX73752.1| lamin B receptor [Schistosoma japonicum]	183	42.0765	4e-36
FG1_Contig33712	265	35	23.0528	ref|XP_002578367.1| hypothetical protein [Schistosoma mansoni] emb|CAZ34605.1| expressed protein [Schistosoma mansoni]	86	76.7442	1e-31
FG1_Contig32135	448	59	22.9867	gb|AAX27466.2| SJCHGC04870 protein [Schistosoma japonicum]	147	69.3878	3e-55
FG1_Contig17254	691	91	22.9861	ref|XP_002575510.1| non-receptor protein-tyrosine phosphatase [Schistosoma mansoni] emb|CAZ31743.1| non-receptor protein-tyrosine phosphatase, putative [Schistosoma mansoni]	147	62.585	1e-50
FG1_Contig27442	849	111	22.8201	ref|XP_002573132.1| prostatic acid phosphatase [Schistosoma mansoni] emb|CAZ29364.1| prostatic acid phosphatase, putative [Schistosoma mansoni]	281	42.3488	1e-57
FG1_Contig16616	605	79	22.7916	ref|XP_002574646.1| tuftelin interacting protein [Schistosoma mansoni] emb|CAZ30879.1| tuftelin interacting protein, putative [Schistosoma mansoni]	214	54.6729	3e-49
FG1_Contig340	830	107	22.5013	ref|XP_002578337.1| mixed-lineage leukemia 5 mll5 [Schistosoma mansoni] emb|CAZ34575.1| mixed-lineage leukemia 5, mll5, putative [Schistosoma mansoni]	215	58.1395	7e-72
FG1_Contig12528	359	46	22.3648	gb|AAX27853.2| SJCHGC01499 protein [Schistosoma japonicum]	97	63.9175	9e-31
FG1_Contig17015	654	83	22.1515	ref|XP_002574584.1| ankyrin 23/unc44 [Schistosoma mansoni] emb|CAZ30817.1| ankyrin 2,3/unc44, putative [Schistosoma mansoni]	103	78.6408	1e-41
FG1_Contig13664	419	53	22.0782	gb|AAP06309.1| SJCHGC05882 protein [Schistosoma japonicum]	106	60.3774	1e-33
FG1_Contig28055	468	59	22.0043	emb|CAX74332.1| Brix domain-containing protein 1 [Schistosoma japonicum]	146	54.7945	3e-40
FG1_Contig31425	484	61	21.9982	ref|XP_002574355.1| ATP-binding cassette sub-family g2 (white protein) (abcg2) [Schistosoma mansoni] emb|CAZ30588.1| ATP-binding cassette, sub-family g2 (white protein) (abcg2), putative [Schistosoma mansoni]	142	59.1549	1e-39
FG1_Contig12224	349	43	21.5053	emb|CAX83030.1| putative mitochondrial import receptor subunit TOM40 homolog [Schistosoma japonicum]	116	72.4138	2e-44
FG1_Contig17319	708	86	21.2015	ref|XP_002579842.1| hypothetical protein [Schistosoma mansoni] emb|CAZ36081.1| expressed protein [Schistosoma mansoni]	218	55.5046	1e-57
FG1_Contig16799	628	75	20.8451	ref|XP_002575382.1| subfamily S8B unassigned peptidase (S08 family) [Schistosoma mansoni] emb|CAZ31615.1| subfamily S8B unassigned peptidase (S08 family) [Schistosoma mansoni]	212	36.7925	9e-35
FG1_Contig30419	959	114	20.7486	ref|XP_002579750.1| homeobox protein six-related [Schistosoma mansoni] emb|CAZ35989.1| homeobox protein six-related [Schistosoma mansoni]	315	50.4762	1e-73
FG1_Contig17455	721	84	20.3351	ref|XP_002571596.1| hypothetical protein [Schistosoma mansoni] emb|CAZ27826.1| expressed protein [Schistosoma mansoni]	209	50.7177	4e-59
FG1_Contig38465	502	58	20.1663	ref|XP_002572546.1| sodium bicarbonate cotransporter (nbc2 3) [Schistosoma mansoni] emb|CAZ28778.1| sodium bicarbonate cotransporter (nbc2, 3), putative [Schistosoma mansoni]	145	63.4483	6e-48
FG1_Contig17059	682	78	19.9624	ref|XP_002571726.1| ATP-dependent RNA Helicase [Schistosoma mansoni] emb|CAZ27956.1| ATP-dependent RNA Helicase, putative [Schistosoma mansoni]	185	67.027	3e-67
FG1_Contig19650	966	110	19.8755	ref|XP_002573641.1| cpg binding protein [Schistosoma mansoni] emb|CAZ29873.1| cpg binding protein, putative [Schistosoma mansoni]	299	38.4615	3e-46
FG1_Contig35906	665	75	19.6853	ref|XP_002578656.1| tektin [Schistosoma mansoni] emb|CAZ34894.1| tektin, putative [Schistosoma mansoni]	166	55.4217	1e-46
FG1_Contig12848	384	43	19.5452	ref|XP_002573507.1| ccr4-not transcription complex [Schistosoma mansoni] emb|CAZ29739.1| ccr4-not transcription complex, putative [Schistosoma mansoni]	125	68.8	9e-44
FG1_Contig16644	608	68	19.5213	gb|AAW25806.1| SJCHGC05486 protein [Schistosoma japonicum]	146	77.3973	9e-68
FG1_Contig17180	691	77	19.4498	ref|XP_002576068.1| nedd4-binding protein 2 [Schistosoma mansoni] emb|CAZ32303.1| nedd4-binding protein 2, putative [Schistosoma mansoni]	176	68.1818	3e-72
FG1_Contig15682	521	58	19.4309	ref|XP_002572682.1| zinc finger protein [Schistosoma mansoni] emb|CAZ28914.1| zinc finger protein, putative [Schistosoma mansoni]	127	59.8425	1e-36
FG1_Contig17736	881	98	19.4157	ref|XP_002572865.1| selectively expressed in embryonic epithelia protein-1 [Schistosoma mansoni] emb|CAZ29097.1| selectively expressed in embryonic epithelia protein-1 , putative [Schistosoma mansoni]	291	38.8316	2e-49
FG1_Contig14259	738	82	19.3937	ref|XP_002579263.1| ubiquitin-activating enzyme E1b [Schistosoma mansoni] emb|CAZ35502.1| ubiquitin-activating enzyme E1b, putative [Schistosoma mansoni]	188	53.1915	3e-47
FG1_Contig6013	280	31	19.3244	ref|XP_002579842.1| hypothetical protein [Schistosoma mansoni] emb|CAZ36081.1| expressed protein [Schistosoma mansoni]	86	79.0698	6e-30
FG1_Contig14627	451	49	18.9636	emb|CAX73510.1| glyceraldehyde 3-phosphate dehydrogenase [Schistosoma japonicum]	149	89.2617	1e-72
FG1_Contig16698	614	65	18.4777	ref|XP_002580556.1| Fxna peptidase (M28 family) [Schistosoma mansoni] emb|CAZ36795.1| Fxna peptidase (M28 family) [Schistosoma mansoni]	195	40.5128	2e-34
FG1_Contig13538	401	42	18.2813	ref|XP_002571727.1| vacuolar protein sorting vps16 [Schistosoma mansoni] emb|CAZ27957.1| vacuolar protein sorting vps16, putative [Schistosoma mansoni]	125	56.8	4e-36
FG1_Contig36794	846	88	18.1558	ref|XP_002577612.1| hypothetical protein [Schistosoma mansoni] emb|CAZ33850.1| expressed protein [Schistosoma mansoni]	299	42.1405	2e-55
FG1_Contig11795	335	34	17.7148	ref|XP_002576462.1| disco-interacting protein 2 (dip2) [Schistosoma mansoni] emb|CAZ32699.1| disco-interacting protein 2 (dip2), putative [Schistosoma mansoni]	111	69.3694	1e-35
FG1_Contig9896	282	28	17.3305	ref|XP_002571151.1| hypothetical protein [Schistosoma mansoni] emb|CAZ38836.1| hypothetical protein [Schistosoma mansoni]	93	72.043	5e-33
FG1_Contig12690	365	35	16.737	ref|XP_002570150.1| hypothetical protein [Schistosoma mansoni] emb|CAY17899.1| expressed protein [Schistosoma mansoni]	121	74.3802	1e-47
FG1_Contig17473	723	69	16.6576	ref|XP_002578746.1| hypothetical protein [Schistosoma mansoni] emb|CAZ34984.1| expressed protein [Schistosoma mansoni]	236	38.1356	3e-37
FG1_Contig12772	367	35	16.6458	ref|XP_002578860.1| ryanodine receptor related [Schistosoma mansoni] emb|CAZ35098.1| ryanodine receptor related [Schistosoma mansoni]	91	78.022	5e-31
FG1_Contig31694	357	34	16.6231	emb|CAX73536.1| TBC1 domain family member 8 (Vascular Rab-GAP/TBC-containing protein) [Schistosoma japonicum]	104	67.3077	2e-35
FG1_Contig13344	391	36	16.0705	emb|CAX72995.1| poly (A) polymerase beta [Schistosoma japonicum]	108	76.8519	7e-39
FG1_Contig13898	416	38	15.9438	emb|CAX72697.1| protein phosphatase [Schistosoma japonicum]	117	61.5385	1e-33
FG1_Contig14169	428	39	15.9046	ref|XP_002571727.1| vacuolar protein sorting vps16 [Schistosoma mansoni] emb|CAZ27957.1| vacuolar protein sorting vps16, putative [Schistosoma mansoni]	142	60.5634	6e-40
FG1_Contig16554	597	54	15.7878	ref|XP_002580997.1| lupus la ribonucleoprotein [Schistosoma mansoni] emb|CAZ37236.1| lupus la ribonucleoprotein, putative [Schistosoma mansoni]	192	48.9583	1e-39
FG1_Contig16302	587	53	15.7594	ref|XP_002575156.1| fkbp-rapamycin associated protein [Schistosoma mansoni] emb|CAZ31389.1| fkbp-rapamycin associated protein, putative [Schistosoma mansoni]	184	42.9348	2e-30
FG1_Contig14049	422	38	15.7171	ref|XP_002573158.1| hypothetical protein [Schistosoma mansoni] emb|CAZ29390.1| expressed protein [Schistosoma mansoni]	140	63.5714	1e-48
FG1_Contig272	279	25	15.64	ref|XP_002579974.1| vinculin [Schistosoma mansoni] emb|CAZ36213.1| vinculin, putative [Schistosoma mansoni]	90	82.2222	3e-33
FG1_Contig14979	472	42	15.5314	ref|XP_002580648.1| sex-determining protein fem-1 [Schistosoma mansoni] emb|CAZ36887.1| sex-determining protein fem-1, putative [Schistosoma mansoni]	121	78.5124	3e-48
FG1_Contig12914	373	33	15.4421	ref|XP_002572872.1| cdc50-related [Schistosoma mansoni] emb|CAZ29104.1| cdc50-related [Schistosoma mansoni]	119	68.9076	2e-42
FG1_Contig16585	601	53	15.3923	ref|XP_002578090.1| hypothetical protein [Schistosoma mansoni] emb|CAZ34328.1| expressed protein [Schistosoma mansoni]	142	72.5352	1e-52
FG1_Contig27771	366	32	15.2606	gb|AAX26259.2| SJCHGC08083 protein [Schistosoma japonicum]	101	73.2673	5e-39
FG1_Contig23191	369	32	15.1365	ref|XP_002576541.1| origin recognition complex subunit [Schistosoma mansoni] emb|CAZ32778.1| origin recognition complex subunit, putative [Schistosoma mansoni]	124	65.3226	2e-39
FG1_Contig9718	278	24	15.0685	ref|XP_002576462.1| disco-interacting protein 2 (dip2) [Schistosoma mansoni] emb|CAZ32699.1| disco-interacting protein 2 (dip2), putative [Schistosoma mansoni]	92	90.2174	4e-40
FG1_Contig16715	615	53	15.0419	ref|XP_002577612.1| hypothetical protein [Schistosoma mansoni] emb|CAZ33850.1| expressed protein [Schistosoma mansoni]	188	70.7447	1e-74
FG1_Contig18152	889	76	14.9216	ref|XP_002576057.1| hypothetical protein [Schistosoma mansoni] emb|CAZ32292.1| expressed protein [Schistosoma mansoni]	290	45.5172	5e-59
FG1_Contig17160	676	57	14.7174	ref|XP_002579230.1| acidic fibroblast growth factor intracellular binding protein [Schistosoma mansoni] emb|CAZ35469.1| acidic fibroblast growth factor intracellular binding protein, putative [Schistosoma mansoni]	206	40.7767	8e-40
FG1_Contig18157	891	75	14.6922	ref|XP_002577578.1| hypothetical protein [Schistosoma mansoni] emb|CAZ33816.1| expressed protein [Schistosoma mansoni]	300	41	1e-45
FG1_Contig16556	598	50	14.5939	ref|XP_002575933.1| DNAj (hsp40) homolog subfamily C member [Schistosoma mansoni] emb|CAZ32168.1| DNAj (hsp40) homolog, subfamily C, member, putative [Schistosoma mansoni]	198	55.5556	3e-52
FG1_520662	395	33	14.5821	ref|XP_002580232.1| type V p-type atpase isoform [Schistosoma mansoni] emb|CAZ36471.1| type V p-type atpase isoform, putative [Schistosoma mansoni]	82	81.7073	3e-35
FG1_Contig9621	276	23	14.5452	ref|XP_002572300.1| hypothetical protein [Schistosoma mansoni] emb|CAZ28531.1| expressed protein [Schistosoma mansoni]	92	73.913	2e-33
FG1_514606	341	28	14.332	ref|XP_002579962.1| multidrug resistance protein [Schistosoma mansoni] emb|CAZ36201.1| multidrug resistance protein 1, 2, 3 (p glycoprotein 1, 2, 3), putative [Schistosoma mansoni]	113	61.0619	5e-32
FG1_529126	513	42	14.2901	ref|XP_002579958.1| multidrug resistance protein [Schistosoma mansoni] emb|CAZ36197.1| multidrug resistance protein 1, 2, 3 (p glycoprotein 1, 2, 3), putative [Schistosoma mansoni]	144	59.7222	3e-44
FG1_Contig7094	258	21	14.207	ref|XP_002572984.1| elongation of fatty acids protein 1 [Schistosoma mansoni] emb|CAZ29216.1| elongation of fatty acids protein 1 [Schistosoma mansoni]	81	74.0741	3e-33
FG1_Contig13956	418	34	14.1973	ref|XP_002572775.1| hypothetical protein [Schistosoma mansoni] emb|CAZ29007.1| expressed protein [Schistosoma mansoni]	131	54.9618	2e-32
FG1_Contig32067	634	50	13.7652	ref|XP_002572971.1| prolyl oligopeptidase (S09 family) [Schistosoma mansoni] emb|CAZ29203.1| prolyl oligopeptidase (S09 family) [Schistosoma mansoni]	203	76.8473	2e-79
FG1_Contig31389	343	27	13.7395	ref|XP_002572948.1| hypothetical protein [Schistosoma mansoni] emb|CAZ29180.1| expressed protein [Schistosoma mansoni]	114	68.4211	2e-38
FG1_Contig10973	343	27	13.7395	ref|XP_002578858.1| symplekin [Schistosoma mansoni] emb|CAZ35096.1| symplekin, putative [Schistosoma mansoni]	100	86	7e-44
FG1_Contig12612	362	28	13.5006	ref|XP_002573658.1| zinc finger protein [Schistosoma mansoni] emb|CAZ29890.1| zinc finger protein, putative [Schistosoma mansoni]	109	80.7339	6e-51
FG1_Contig29939	235	18	13.3692	ref|XP_002579740.1| tho2 protein [Schistosoma mansoni] emb|CAZ35979.1| tho2 protein, putative [Schistosoma mansoni]	78	89.7436	2e-32
FG1_Contig6813	222	17	13.3659	ref|XP_002577167.1| DNA-directed RNA polymerase III subunit [Schistosoma mansoni] emb|CAZ33404.1| DNA-directed RNA polymerase III subunit, putative [Schistosoma mansoni]	74	90.5405	1e-32
FG1_Contig13724	407	31	13.2944	emb|CAX83030.1| putative mitochondrial import receptor subunit TOM40 homolog [Schistosoma japonicum]	137	72.9927	3e-53
FG1_Contig36279	293	22	13.1056	ref|XP_002581173.1| hypothetical protein [Schistosoma mansoni] emb|CAZ37412.1| conserved hypothetical protein [Schistosoma mansoni]	92	71.7391	3e-32
FG1_Contig35705	281	20	12.423	ref|XP_002578556.1| cleavage and polyadenylation specificity factor [Schistosoma mansoni] emb|CAZ34794.1| cleavage and polyadenylation specificity factor, putative [Schistosoma mansoni]	91	78.022	3e-35
FG1_Contig16260	576	40	12.121	ref|XP_002579856.1| hypothetical protein [Schistosoma mansoni] emb|CAZ36095.1| hypothetical protein [Schistosoma mansoni]	183	53.5519	1e-43
FG1_Contig14448	441	30	11.8737	ref|XP_002569971.1| DNA replication licensing factor MCM4 [Schistosoma mansoni] emb|CAY17528.1| DNA replication licensing factor MCM4, putative [Schistosoma mansoni]	147	72.7891	3e-55
FG1_Contig11615	329	22	11.6716	emb|CAX82745.1| 5'-nucleotidase [Schistosoma japonicum]	108	60.1852	4e-31
FG1_Contig9715	278	18	11.3013	ref|XP_002573221.1| nipped-b-like protein (delangin) (scc2 homolog) [Schistosoma mansoni] emb|CAZ29453.1| nipped-b-like protein (delangin) (scc2 homolog), putative [Schistosoma mansoni]	88	93.1818	1e-35
FG1_Contig10919	310	20	11.2608	ref|XP_002576171.1| hypothetical protein [Schistosoma mansoni] emb|CAZ32406.1| expressed protein [Schistosoma mansoni]	102	68.6275	8e-35
FG1_Contig13645	421	27	11.194	ref|XP_002573300.1| hypothetical protein [Schistosoma mansoni] emb|CAZ29532.1| WD-repeat protein, putative [Schistosoma mansoni]	142	52.8169	1e-36
FG1_Contig10795	306	19	10.8376	gb|AAW26321.1| SJCHGC09002 protein [Schistosoma japonicum]	102	65.6863	6e-35
FG1_Contig13281	388	24	10.7965	emb|CAX83072.1| DEAD (Asp-Glu-Ala-Asp) box polypeptide 56 [Schistosoma japonicum]	128	57.0312	6e-37
FG1_Contig35145	326	20	10.7082	emb|CAX75128.1| purine-nucleoside phosphorylase [Schistosoma japonicum]	108	63.8889	9e-33
FG1_Contig13017	377	22	10.1855	ref|XP_002572728.1| Tata binding protein associated factor (M01 family) [Schistosoma mansoni] emb|CAZ28960.1| Tata binding protein associated factor (M01 family) [Schistosoma mansoni]	123	73.9837	3e-49
FG1_Contig34246	313	18	10.0376	ref|XP_002579740.1| tho2 protein [Schistosoma mansoni] emb|CAZ35979.1| tho2 protein, putative [Schistosoma mansoni]	97	77.3196	2e-37
FG1_Contig27466	343	19	9.66856	ref|XP_002572948.1| hypothetical protein [Schistosoma mansoni] emb|CAZ29180.1| expressed protein [Schistosoma mansoni]	114	74.5614	1e-42
FG1_Contig10822	307	17	9.66524	ref|XP_002575317.1| laminin [Schistosoma mansoni] emb|CAZ31550.1| laminin, putative [Schistosoma mansoni]	101	64.3564	2e-35
FG1_520798	396	21	9.25607	ref|XP_002577578.1| hypothetical protein [Schistosoma mansoni] emb|CAZ33816.1| expressed protein [Schistosoma mansoni]	132	80.303	6e-56
FG1_506524	288	15	9.09078	gb|AAX26642.2| SJCHGC06744 protein [Schistosoma japonicum]	95	72.6316	5e-36
FG1_505392	282	14	8.66525	ref|XP_002577578.1| hypothetical protein [Schistosoma mansoni] emb|CAZ33816.1| expressed protein [Schistosoma mansoni]	93	80.6452	1e-38
FG1_Contig10096	291	14	8.39726	ref|XP_002576288.1| laminin beta chain-related [Schistosoma mansoni] emb|CAZ32524.1| laminin beta chain-related [Schistosoma mansoni]	97	90.7216	2e-47
FG1_Contig12697	365	16	7.6512	ref|XP_002573906.1| cell adhesion molecule [Schistosoma mansoni] emb|CAZ30139.1| cell adhesion molecule, putative [Schistosoma mansoni]	120	60.8333	2e-38
a Transcripts homologous (BLASTx, E-value <1E-30) to predicted proteins from other trematodes and non-homologous (BLASTx, E-value >1E-30) to predicted proteins within eukaryote protein databases used in this study (see Table 2)
b Sequences ranked based on their relative level of transcription inferred from the number of mapped raw sequence reads per kilobase per million reads (RPKM).
