# Supplementary material for: A Portrait of the Transcriptome of the Neglected Trematode, Fasciola gigantica—Biological and Biotechnological Implications
Source: PLoS Negl Trop Dis. 2011 Feb 1;5(2):e1004. doi: 10.1371/journal.pntd.0001004 (PMC3051338; doi:10.1371/journal.pntd.0001004)
Supplement: Table S6 — Putative adult Fasciola gigantica proteins with homology to proteases and protease inhibitors within the MEROPS enzyme database. (XLSX) [file pntd.0001004.s009.xlsx]

## Sheet: Supplementary_Table_S6
Supplementary Table S6. Putative adult Fasciola gigantica proteins with homology to proteases and protease inhibitors within the MEROPS enzyme databasea
Sequence	Length (bp)	Mapped reads	RPKMc	MEROPS UNIT	MEROPS_ID	Best hit to MEROPS database	BLASTx			Best hit to NCBI non-redundant protein databaseb	BLASTx
							Score	% ID	E-value		Score	%ID	E-value
Aspartic protease
FG1_Contig4838	402	1339	581.376	A01A	MER136984	phytepsin (Zea mays) [A01.020]	94	30.8511	2e-07	ref|XP_002571486.1| saposin containing protein [Schistosoma mansoni] emb|CAZ27710.1| saposin containing protein [Schistosoma mansoni]	143	37.0629	3e-22
FG1_Contig19415	1286	2259	306.604	A01A	MER080861	cathepsin D (Fasciola hepatica) [A01.009]	329	98.7842	0	gb|ACI04164.1| cathepsin D-like aspartic protease precursor [Fasciola hepatica]	402	99.7512	0
FG1_Contig32313	1995	2287	200.09	A02A	MER200446	subfamily A2A unassigned peptidases (Solanum demissum) [A02.UPA]	91	43.956	9e-13	ref|XP_001184403.1| PREDICTED: similar to gag-pol polyprotein, partial [Strongylocentrotus purpuratus]	323	47.0588	9e-74
FG1_Contig19227	2379	1432	105.063	A22B	MER184751	subfamily A22B unassigned peptidases (Schistosoma mansoni) [A22.UPB]	353	41.3598	5e-73	ref|XP_002577370.1| impas 3 peptidase (A22 family) [Schistosoma mansoni] emb|CAZ33608.1| impas 3 peptidase (A22 family) [Schistosoma mansoni]	379	39.8417	6e-72
FG1_Contig18946	1282	361	49.1498	A22B	MER031166	impas 1 peptidase (Schistosoma japonicum) [A22.003]	310	54.8387	1e-98	gb|AAP05959.1| SJCHGC09361 protein [Schistosoma japonicum]	310	54.8387	1e-96
FG1_Contig11701	342	75	38.277	A02A	MER000979	murine leukemia virus-type retropepsin (baboon endogenous virus) [A02.008]	96	35.4167	5e-06	emb|CAX83693.1| Gap-Pol polyprotein [Schistosoma japonicum]	97	30.9278	5e-07
FG1_Contig21879	542	68	21.8984	A02A	MER201123	subfamily A2A unassigned peptidases (Oryza sativa) [A02.UPA]	64	43.75	5e-10	gb|AAK07486.1| gag-pol polyprotein [Clonorchis sinensis]	65	61.5385	3e-26
FG1_Contig6866	223	26	20.3503	A22A	MER119160	subfamily A22A unassigned peptidases (Schistosoma japonicum) [A22.UPA]	36	94.4444	6e-13	emb|CAX74629.1| Presenilin [Schistosoma japonicum]	36	94.4444	5e-11
FG1_493429	232	26	19.5608	A02A	MER142521	subfamily A2A unassigned peptidases (Vanderwaltozyma polyspora) [A02.UPA]	75	52	3e-16	emb|CAX83694.1| Gap-Pol polyprotein [Schistosoma japonicum]	73	65.7534	3e-23
FG1_Contig9135	266	25	16.4044	A22A	MER119160	subfamily A22A unassigned peptidases (Schistosoma japonicum) [A22.UPA]	88	85.2273	5e-38	emb|CAX74629.1| Presenilin [Schistosoma japonicum]	88	85.2273	4e-36
FG1_Contig16669	618	58	16.3811	A01A	MER156449	memapsin-2 (Dipodomys ordii) [A01.004]	200	27	8e-11	ref|XP_002580609.1| memapsin-2 (A01 family) [Schistosoma mansoni] emb|CAZ36848.1| memapsin-2 (A01 family) [Schistosoma mansoni]	230	28.6957	6e-17
FG1_501464	263	19	12.6096	A02A	MER201123	subfamily A2A unassigned peptidases (Oryza sativa) [A02.UPA]	43	58.1395	6e-14	tpg|DAA04499.1| TPA_exp: pol polyprotein [Schistosoma mansoni]	44	63.6364	3e-21
FG1_501822	265	15	9.87979	A02X	MER016568	family A2 unassigned peptidases (Clonorchis sinensis) [A02.UPW]	76	44.7368	7e-12	ref|XP_001184403.1| PREDICTED: similar to gag-pol polyprotein, partial [Strongylocentrotus purpuratus]	77	44.1558	6e-11
FG1_Contig37704	296	15	8.84508	A22A	MER170601	Psn peptidase {{Drosophila}-type} (Culex pipiens) [A22.014]	67	46.2687	6e-12	emb|CAX74629.1| Presenilin [Schistosoma japonicum]	58	75.8621	1e-20
Cysteine protease
FG1_14867	350	5099	2542.84	C13	MER089978	hemoglobinase {trematode} (Fasciola gigantica) [C13.007]	98	100	8e-53	gb|ABQ02437.1| legumain-1 [Fasciola gigantica]	116	90.5172	8e-53
FG1_Contig21909	489	4924	1757.57	C01A	MER053673	cathepsin B (Canis familiaris) [C01.060]	144	49.3056	3e-33	emb|CAD44625.1| cathepsin B1 isotype 2 [Schistosoma mansoni]	145	55.1724	2e-43
FG1_Contig20014	317	2557	1407.91	C01A	MER028759	fascipain B (Fasciola gigantica) [C01.115]	103	67.9612	1e-40	gb|AAO73003.1| cathepsin B [Fasciola gigantica]	103	67.9612	1e-38
FG1_Contig20316	261	2084	1393.67	C13	MER079655	hemoglobinase {trematode} (Fasciola gigantica) [C13.007]	67	100	4e-35	gb|ABQ02438.1| legumain-2 [Fasciola gigantica]	77	100	5e-39
FG1_Contig20373	509	2932	1005.42	C01A	MER158389	SmCB2 peptidase {{Schistosoma}-type} (Trichobilharzia szidati) [C01.061]	169	71.5976	2e-80	gb|ACG50797.1| cathepsin B2 [Trichobilharzia szidati]	169	71.5976	9e-79
FG1_Contig21052	214	1102	898.815	C01A	MER028758	fascipain B (Fasciola gigantica) [C01.115]	40	80	1e-14	gb|AAO73002.1| cathepsin B [Fasciola gigantica]	71	74.6479	5e-26
FG1_Contig20706	212	965	794.5	C01A	MER158389	SmCB2 peptidase {{Schistosoma}-type} (Trichobilharzia szidati) [C01.061]	41	70.7317	3e-12	gb|ABS57370.1| cathepsin B2 [Trichobilharzia regenti]	66	63.6364	1e-18
FG1_Contig20923	206	841	712.576	C13	MER079655	hemoglobinase {trematode} (Fasciola gigantica) [C13.007]	29	100	1e-11	gb|ABQ02438.1| legumain-2 [Fasciola gigantica]	56	100	1e-26
FG1_Contig22270	272	922	591.649	C01A	MER183929	cathepsin B (Lepeophtheirus salmonis) [C01.060]	46	73.913	2e-15	gb|AAW27892.1| unknown [Schistosoma japonicum]	67	58.209	9e-17
FG1_Contig23324	456	1314	502.959	C01A	MER183551	cathepsin B (Ochotona princeps) [C01.060]	43	79.0698	4e-15	gb|ABF85679.1| cathepsin B2 [Fasciola hepatica]	90	48.8889	3e-17
FG1_Contig19915	1248	3065	428.665	C01A	MER159438	SmCL3 peptidase {{Schistosoma mansoni}} (Clonorchis sinensis) [C01.152]	223	65.9193	2e-83	ref|XP_002577726.1| subfamily C1A unassigned peptidase (C01 family) [Schistosoma mansoni] emb|CAZ33964.1| subfamily C1A unassigned peptidase (C01 family) [Schistosoma mansoni]	328	54.2683	7e-98
FG1_Contig20683	909	1906	365.983	C02A	MER144820	calpain A (Drosophila willistoni) [C02.014]	143	48.951	6e-36	emb|CAX73750.1| Calpain-B [Schistosoma japonicum]	302	62.2517	1e-104
FG1_Contig37732	361	552	266.891	C13	MER089978	hemoglobinase {trematode} (Fasciola gigantica) [C13.007]	141	57.4468	2e-34	gb|ABQ02437.1| legumain-1 [Fasciola gigantica]	141	57.4468	2e-32
FG1_Contig30884	311	448	251.432	C01A	MER028759	fascipain B (Fasciola gigantica) [C01.115]	71	76.0563	6e-31	ref|XP_002581167.1| cathepsin B-like peptidase (C01 family) [Schistosoma mansoni] emb|CAD44624.1| cathepsin B1 isotype 1 [Schistosoma mansoni] emb|CAZ37406.1| cathepsin B-like peptidase (C01 family) [Schistosoma mansoni]	67	83.5821	3e-28
FG1_Contig25507	1446	2033	245.398	C01A	MER002307	subfamily C1A unassigned peptidases (Fasciola hepatica) [C01.UPA]	166	87.3494	2e-84	gb|ACJ12893.1| cathepsin L1D [Fasciola hepatica]	312	50.3205	7e-84
FG1_Contig22347	810	886	190.92	C02A	MER099280	subfamily C2A unassigned peptidases (Schistosoma japonicum) [C02.UPA]	152	71.7105	2e-63	emb|CAX73750.1| Calpain-B [Schistosoma japonicum]	224	65.625	2e-83
FG1_Contig14132	426	457	187.244	C19	MER014125	ubiquitin-specific peptidase 48 (Arabidopsis thaliana) [C19.068]	128	37.5	2e-21	emb|CAB62464.1| putative protein [Arabidopsis thaliana]	128	37.5	2e-19
FG1_Contig22245	2607	2327	155.796	C02A	MER099287	calpain {{Schistosoma} sp.} (Schistosoma haematobium) [C02.023]	257	69.2607	1e-110	dbj|BAF62290.1| calpain [Schistosoma haematobium]	759	64.6904	0
FG1_Contig17743	776	669	150.476	C12	MER119817	family C12 unassigned peptidases (Xenopus tropicalis) [C12.UPW]	224	41.5179	3e-47	ref|NP_001017120.1| ubiquitin carboxyl-terminal esterase L4 [Xenopus (Silurana) tropicalis] emb|CAJ83746.1| ubiquitin carboxyl-terminal esterase L3 [Xenopus tropicalis] gb|AAI35704.1| ubiquitin carboxyl-terminal esterase L4 [Xenopus (Silurana) tropicalis]	226	41.1504	8e-46
FG1_Contig3478	1442	1135	137.383	C19	MER163558	ubiquitin-specific peptidase 2 (Ixodes scapularis) [C19.013]	328	57.9268	1e-106	emb|CAX73508.1| Ubiquitin carboxyl-terminal hydrolase 2 [Schistosoma japonicum]	359	69.3593	1e-144
FG1_Contig14164	453	351	135.242	C01A	MER028758	fascipain B (Fasciola gigantica) [C01.115]	150	66	3e-63	gb|AAO73004.1| cathepsin B [Fasciola gigantica]	150	66	2e-61
FG1_Contig25368	729	556	133.122	C13	MER089978	hemoglobinase {trematode} (Fasciola gigantica) [C13.007]	216	74.537	9e-98	gb|ABQ02437.1| legumain-1 [Fasciola gigantica]	226	73.8938	2e-99
FG1_Contig32322	1499	1113	129.597	C01A	MER012043	cathepsin F (Paragonimus westermani) [C01.018]	216	77.3148	1e-100	gb|AAF21461.1|U69120_1 cysteine proteinase PWCP1 [Paragonimus westermani]	427	54.8009	1e-126
FG1_Contig14853	641	415	113.004	C13	MER089978	hemoglobinase {trematode} (Fasciola gigantica) [C13.007]	47	61.7021	4e-08	gb|ABQ02437.1| legumain-1 [Fasciola gigantica]	188	68.0851	2e-67
FG1_Contig23049	1010	635	109.737	C12	MER185278	ubiquitinyl hydrolase-UCH37 (Schistosoma mansoni) [C12.005]	219	70.3196	1e-87	ref|XP_002579412.1| ubiquitinyl hydrolase-UCH37 (C12 family) [Schistosoma mansoni] emb|CAZ35651.1| ubiquitinyl hydrolase-UCH37 (C12 family) [Schistosoma mansoni]	312	65.3846	1e-111
FG1_Contig18314	1029	618	104.828	C01A	MER172453	fascipain B (Fasciola hepatica) [C01.115]	49	87.7551	1e-112	gb|ABU62925.1| cathepsin B [Fasciola hepatica]	49	87.7551	1e-111
FG1_Contig19417	1521	826	94.788	C85	MER186626	DUBA deubiquitinylating enzyme (Schistosoma mansoni) [C85.001]	109	87.156	7e-54	ref|XP_002570029.1| family C85 unassigned peptidase (C85 family) [Schistosoma mansoni] emb|CAY17642.1| family C85 unassigned peptidase (C85 family) [Schistosoma mansoni]	497	53.5211	1e-128
FG1_Contig19924	515	270	91.508	C83	MER186567	phytochelatin synthase (Schistosoma mansoni) [C83.002]	116	62.931	2e-39	emb|CAX69521.1| Glutathione gamma-glutamylcysteinyltransferase 3 [Schistosoma japonicum]	179	50.2793	9e-43
FG1_Contig20216	4344	2168	87.1108	C19	MER081188	ubiquitin-specific peptidase 7 (Brachydanio rerio) [C19.016]	359	63.2312	1e-130	ref|XP_002579956.1| ubiquitin-specific peptidase 7 (C19 family) [Schistosoma mansoni] emb|CAZ36195.1| ubiquitin-specific peptidase 7 (C19 family) [Schistosoma mansoni]	1320	60.5303	0
FG1_Contig12875	2915	1425	85.3255	C26	MER053238	family C26 unassigned peptidases (Strongylocentrotus purpuratus) [C26.UPW]	202	53.9604	1e-54	ref|XP_002577656.1| GMP synthetase [Schistosoma mansoni] emb|CAZ33894.1| GMP synthetase (glutamine-hydrolysing); family C26 unassigned peptidase (C26 family); phosphoribosylformylglycinamidine syntethase [Schistosoma mansoni]	750	68.6667	0
FG1_Contig19279	1813	776	74.7078	C19	MER035785	family C19 unassigned peptidases (Anopheles gambiae) [C19.UPW]	181	44.7514	7e-41	ref|XP_002573570.1| family C19 unassigned peptidase (C19 family) [Schistosoma mansoni] emb|CAZ29802.1| family C19 unassigned peptidase (C19 family) [Schistosoma mansoni]	433	41.5704	6e-88
FG1_Contig27741	202	86	74.3104	C01A	MER052087	cathepsin B (Triatoma sordida) [C01.060]	65	70.7692	4e-27	emb|CAA80451.1| cathepsin B-like protease [Fasciola hepatica]	65	83.0769	1e-27
FG1_Contig22492	204	85	72.7262	C01A	MER028759	fascipain B (Fasciola gigantica) [C01.115]	35	80	1e-11	gb|AAO73003.1| cathepsin B [Fasciola gigantica]	36	77.7778	5e-10
FG1_Contig18992	3179	1259	69.1254	C64	MER186326	trabid peptidase (Schistosoma mansoni) [C64.004]	322	63.0435	1e-108	ref|XP_001358049.2| GA21793 [Drosophila pseudoobscura pseudoobscura] gb|EAL27186.2| GA21793 [Drosophila pseudoobscura pseudoobscura]	253	52.1739	1e-74
FG1_Contig16894	639	251	68.5607	C19	MER097991	ubiquitin-specific peptidase 14 (Ornithorhynchus anatinus) [C19.015]	148	35.1351	5e-16	gb|AAX27253.2| SJCHGC02682 protein [Schistosoma japonicum]	216	55.5556	5e-63
FG1_Contig22210	614	240	68.2253	C83	MER186567	phytochelatin synthase (Schistosoma mansoni) [C83.002]	105	74.2857	8e-45	ref|XP_002569764.1| family C83 unassigned peptidase (C83 family) [Schistosoma mansoni] emb|CAY17110.1| family C83 unassigned peptidase (C83 family) [Schistosoma mansoni]	146	63.6986	4e-47
FG1_Contig18773	1180	414	61.2379	C13	MER120141	glycosylphosphatidylinositol:protein transamidase (Bombyx mori) [C13.005]	265	67.9245	1e-107	emb|CAX82646.1| phosphatidylinositol glycan, class K [Schistosoma japonicum]	316	70.5696	1e-123
FG1_Contig23010	415	145	60.9849	C01A	MER027265	fascipain B (Fasciola hepatica) [C01.115]	138	65.942	5e-53	gb|ABF85678.1| cathepsin B1 [Fasciola hepatica]	138	66.6667	4e-52
FG1_Contig22566	2042	688	58.8078	C19	MER011185	family C19 unassigned peptidases (Drosophila melanogaster) [C19.UPW]	431	33.8747	1e-67	emb|CAX72904.1| ubiquitin specific peptidase 5 [Schistosoma japonicum]	489	43.7628	1e-112
FG1_Contig26796	1387	439	55.2447	C19	MER069159	ubiquitin-specific peptidase 5 (Monodelphis domestica) [C19.001]	184	47.2826	4e-36	ref|XP_002578206.1| ubiquitin-specific peptidase 5 (C19 family) [Schistosoma mansoni] emb|CAZ34444.1| ubiquitin-specific peptidase 5 (C19 family) [Schistosoma mansoni]	456	63.8158	1e-173
FG1_Contig19168	1560	485	54.265	C19	MER113616	ubiquitin-specific peptidase 14 (Tribolium castaneum) [C19.015]	294	51.0204	3e-75	ref|XP_969056.1| PREDICTED: similar to ubiquitin specific peptidase 14 [Tribolium castaneum] gb|EFA06193.1| hypothetical protein TcasGA2_TC009042 [Tribolium castaneum]	294	51.0204	2e-73
FG1_Contig17251	697	210	52.5883	C26	MER196619	family C26 unassigned peptidases (Haloterrigena turkmenica) [C26.UPW]	43	58.1395	4e-08	ref|XP_002573756.1| CTP synthase [Schistosoma mansoni] emb|CAZ29988.1| CTP synthase, putative [Schistosoma mansoni]	113	58.4071	5e-25
FG1_Contig22646	1111	319	50.1163	C54	MER185951	family C54 unassigned peptidases (Schistosoma mansoni) [C54.UPW]	89	59.5506	1e-25	ref|XP_002575347.1| autophagin-1 (C54 family) [Schistosoma mansoni] emb|CAZ31580.1| autophagin-1 (C54 family) [Schistosoma mansoni]	214	46.729	3e-40
FG1_Contig25186	425	111	45.5865	C26	MER134841	family C26 unassigned peptidases (Populus trichocarpa) [C26.UPW]	136	41.9118	7e-20	ref|XP_002573756.1| CTP synthase [Schistosoma mansoni] emb|CAZ29988.1| CTP synthase, putative [Schistosoma mansoni]	153	50.9804	2e-37
FG1_Contig22163	1127	293	45.3781	C19	MER035785	family C19 unassigned peptidases (Anopheles gambiae) [C19.UPW]	306	33.9869	5e-35	ref|XP_001122214.1| PREDICTED: similar to CG8494-PA [Apis mellifera]	275	34.5455	7e-35
FG1_Contig12577	2006	496	43.1572	C19	MER201624	ubiquitin-specific peptidase 38 (Tetraodon nigroviridis) [C19.056]	359	24.5125	3e-11	emb|CAX72931.1| putative ubiquitin specific protease 38 [Schistosoma japonicum]	626	35.7827	1e-84
FG1_Contig9776	1226	299	42.568	C13	MER089978	hemoglobinase {trematode} (Fasciola gigantica) [C13.007]	126	64.2857	2e-46	emb|CAC85636.1| legumain like precursor [Fasciola hepatica]	225	75.5556	2e-95
FG1_Contig18949	1305	314	41.9973	C19	MER185431	family C19 unassigned peptidases (Schistosoma mansoni) [C19.UPW]	178	71.9101	2e-73	ref|XP_002572693.1| ubiquitin-specific peptidase 4 (C19 family) [Schistosoma mansoni] emb|CAZ28925.1| ubiquitin-specific peptidase 4 (C19 family) [Schistosoma mansoni]	425	54.1176	1e-125
FG1_Contig23027	678	153	39.388	C65	MER029065	otubain-1 (Schistosoma japonicum) [C65.001]	180	71.6667	3e-72	ref|XP_002580675.1| otubain-1 (C65 family) [Schistosoma mansoni] emb|CAZ36914.1| otubain-1 (C65 family) [Schistosoma mansoni]	180	72.7778	1e-71
FG1_Contig18753	1128	254	39.3031	C14A	MER124243	subfamily C14A unassigned peptidases (Schistosoma japonicum) [C14.UPA]	212	58.9623	4e-69	ref|XP_002574296.1| caspase-3 (C14 family) [Schistosoma mansoni] emb|CAZ30529.1| caspase-3 (C14 family) [Schistosoma mansoni] gb|ACU88129.1| caspase-3 [Schistosoma mansoni]	266	55.6391	5e-78
FG1_Contig23946	900	199	38.5934	C15	MER112867	pyroglutamyl-peptidase I {chordate} (Macaca mulatta) [C15.010]	200	39.5	2e-29	ref|NP_001103453.1| pyroglutamyl-peptidase I [Bos taurus]	200	39.5	1e-27
FG1_Contig23956	864	190	38.3833	C54	MER185951	family C54 unassigned peptidases (Schistosoma mansoni) [C54.UPW]	232	40.5172	3e-47	ref|XP_002575347.1| autophagin-1 (C54 family) [Schistosoma mansoni] emb|CAZ31580.1| autophagin-1 (C54 family) [Schistosoma mansoni]	232	40.5172	2e-45
FG1_Contig20249	471	103	38.1697	C19	MER053310	ubiquitin-specific peptidase 16 (Pan troglodytes) [C19.021]	72	38.8889	1e-07	ref|XP_002574515.1| histone deacetylase hda2 [Schistosoma mansoni] emb|CAZ30748.1| histone deacetylase hda2, putative [Schistosoma mansoni]	89	57.3034	7e-28
FG1_Contig21057	619	125	35.247	C12	MER053964	family C12 unassigned peptidases (Schistosoma japonicum) [C12.UPW]	128	50	1e-32	gb|AAW26483.1| SJCHGC01421 protein [Schistosoma japonicum]	128	50	7e-31
FG1_Contig24937	504	101	34.9779	C02A	MER110610	subfamily C2A unassigned peptidases (Oryzias latipes) [C02.UPA]	66	42.4242	5e-10	ref|XP_792213.2| PREDICTED: similar to MGC81349 protein isoform 2 [Strongylocentrotus purpuratus] ref|XP_001176823.1| PREDICTED: similar to MGC81349 protein isoform 1 [Strongylocentrotus purpuratus]	62	45.1613	1e-09
FG1_Contig19043	2004	392	34.1421	C19	MER185431	family C19 unassigned peptidases (Schistosoma mansoni) [C19.UPW]	406	39.4089	1e-66	emb|CAX74618.1| ubiquitin thiolesterase [Schistosoma japonicum]	471	37.5796	9e-66
FG1_Contig27792	1838	343	32.5725	C02A	MER099210	subfamily C2A unassigned peptidases (Schistosoma japonicum) [C02.UPA]	50	82	6e-21	ref|XP_002579968.1| family C2 unassigned peptidase (C02 family) [Schistosoma mansoni] emb|CAZ36207.1| family C2 unassigned peptidase (C02 family) [Schistosoma mansoni]	426	69.9531	1e-175
FG1_Contig22747	1711	319	32.5419	C19	MER185343	family C19 unassigned peptidases (Schistosoma japonicum) [C19.UPW]	358	67.5978	1e-139	gb|AAW27333.1| SJCHGC05977 protein [Schistosoma japonicum]	378	65.6085	1e-141
FG1_Contig15435	502	88	30.5972	C02A	MER099210	subfamily C2A unassigned peptidases (Schistosoma japonicum) [C02.UPA]	166	81.3253	8e-76	gb|AAW26622.1| SJCHGC01809 protein [Schistosoma japonicum]	166	81.3253	4e-74
FG1_Contig12868	379	65	29.9348	C44	MER185689	family C44 unassigned peptidases (Schistosoma mansoni) [C44.UPW]	126	62.6984	2e-39	ref|XP_002574041.1| family C44 unassigned peptidase (C44 family) [Schistosoma mansoni] emb|CAZ30274.1| family C44 unassigned peptidase (C44 family) [Schistosoma mansoni]	126	62.6984	2e-37
FG1_Contig30641	1420	238	29.2544	C19	MER097820	ubiquitin-specific peptidase 47 (Ornithorhynchus anatinus) [C19.055]	141	40.4255	3e-18	ref|NP_598519.2| ubiquitin specific protease 47 [Mus musculus] gb|EDL17017.1| ubiquitin specific peptidase 47, isoform CRA_b [Mus musculus]	141	39.7163	3e-16
FG1_Contig16315	585	98	29.2397	C88	MER186687	YOD1 peptidase (Schistosoma mansoni) [C88.002]	50	74	2e-17	gb|AAX27106.2| SJCHGC06419 protein [Schistosoma japonicum]	126	66.6667	7e-44
FG1_Contig16160	559	89	27.7895	C19	MER111041	ubiquitin-specific peptidase 9X (Oryzias latipes) [C19.017]	172	42.4419	7e-29	ref|XP_002573190.1| ubiquitin-specific peptidase 9X (C19 family) [Schistosoma mansoni] emb|CAZ29422.1| ubiquitin-specific peptidase 9X (C19 family) [Schistosoma mansoni]	161	49.0683	3e-39
FG1_Contig13902	416	64	26.8528	C65	MER029065	otubain-1 (Schistosoma japonicum) [C65.001]	93	58.0645	5e-23	ref|XP_002580675.1| otubain-1 (C65 family) [Schistosoma mansoni] emb|CAZ36914.1| otubain-1 (C65 family) [Schistosoma mansoni]	95	62.1053	3e-22
FG1_Contig25720	397	61	26.8189	C02A	MER091533	calpain-5 (Brachydanio rerio) [C02.011]	119	39.4958	7e-14	ref|NP_001073476.1| calpain 5 [Danio rerio] gb|AAI25868.1| Zgc:153446 [Danio rerio] gb|AAI64555.1| Zgc:153446 protein [Danio rerio]	119	39.4958	5e-12
FG1_Contig14971	474	72	26.5129	C44	MER185689	family C44 unassigned peptidases (Schistosoma mansoni) [C44.UPW]	142	63.3803	2e-45	ref|XP_002574041.1| family C44 unassigned peptidase (C44 family) [Schistosoma mansoni] emb|CAZ30274.1| family C44 unassigned peptidase (C44 family) [Schistosoma mansoni]	157	64.9682	3e-51
FG1_Contig17579	742	112	26.3461	C19	MER166025	ubiquitin-specific peptidase 47 (Pediculus humanus) [C19.055]	187	48.6631	1e-44	ref|XP_002035466.1| GM14716 [Drosophila sechellia] gb|EDW50602.1| GM14716 [Drosophila sechellia]	206	46.1165	1e-41
FG1_Contig6613	423	61	25.1705	C01A	MER028758	fascipain B (Fasciola gigantica) [C01.115]	141	69.5035	2e-59	gb|AAO73004.1| cathepsin B [Fasciola gigantica]	141	69.5035	1e-57
FG1_Contig18764	1142	163	24.9129	C19	MER148840	ubiquitin-specific peptidase 10 (Ciona intestinalis) [C19.018]	285	27.3684	5e-14	ref|XP_002571998.1| ubiquitin-specific peptidase 10 (C19 family) [Schistosoma mansoni] emb|CAZ28228.1| ubiquitin-specific peptidase 10 (C19 family) [Schistosoma mansoni]	393	34.8601	2e-51
FG1_Contig18343	966	134	24.212	C48	MER031318	family C48 unassigned peptidases (Schistosoma japonicum) [C48.UPW]	158	41.7722	4e-33	ref|XP_002571433.1| family C48 unassigned peptidase (C48 family) [Schistosoma mansoni] emb|CAZ39118.1| family C48 unassigned peptidase (C48 family) [Schistosoma mansoni]	213	40.3756	9e-40
FG1_Contig28315	250	34	23.7378	C86	MER125788	Josephin domain containing 2 {{Homo sapiens}} (Xenopus laevis) [C86.005]	82	37.8049	2e-06	gb|AAW27560.1| SJCHGC04005 protein [Schistosoma japonicum]	83	51.8072	1e-17
FG1_Contig7672	237	30	22.094	C12	MER180624	ubiquitinyl hydrolase UCH-D (Nasonia vitripennis) [C12.008]	58	70.6897	7e-20	ref|XP_001601009.1| PREDICTED: similar to LOC495025 protein [Nasonia vitripennis]	60	70	2e-18
FG1_Contig34229	391	47	20.9809	C86	MER186664	family C86 unassigned peptidases (Schistosoma mansoni) [C86.UPW]	114	70.1754	5e-44	gb|AAW24785.1| SJCHGC06165 protein [Schistosoma japonicum] emb|CAX73228.1| Ataxin-3 [Schistosoma japonicum]	125	68.8	2e-43
FG1_Contig9615	276	33	20.8693	C02A	MER081113	calpain-5 (Canis familiaris) [C02.011]	78	51.2821	2e-20	ref|NP_001073476.1| calpain 5 [Danio rerio] gb|AAI25868.1| Zgc:153446 [Danio rerio] gb|AAI64555.1| Zgc:153446 protein [Danio rerio]	61	62.2951	1e-17
FG1_Contig17419	715	84	20.5057	C14B	MER070589	subfamily C14B unassigned peptidases (Rhodopseudomonas palustris) [C14.UPB]	165	24.8485	2e-09	emb|CAK11171.2| novel protein similar to mucosa associated lymphoid tissue lymphoma translocation gene 1 (malt1) [Danio rerio]	93	38.7097	1e-08
FG1_Contig18114	889	104	20.419	C19	MER147209	ubiquitin-specific peptidase 48 (Ciona savignyi) [C19.068]	251	34.2629	3e-30	gb|AAW26304.1| SJCHGC05186 protein [Schistosoma japonicum]	279	55.1971	3e-84
FG1_Contig16040	553	64	20.2003	C02A	MER099210	subfamily C2A unassigned peptidases (Schistosoma japonicum) [C02.UPA]	55	85.4545	6e-22	ref|XP_002579968.1| family C2 unassigned peptidase (C02 family) [Schistosoma mansoni] emb|CAZ36207.1| family C2 unassigned peptidase (C02 family) [Schistosoma mansoni]	140	75	7e-58
FG1_Contig35539	296	33	19.4592	C01A	MER028760	fascipain B (Fasciola gigantica) [C01.115]	46	82.6087	2e-18	gb|AAO73002.1| cathepsin B [Fasciola gigantica]	46	82.6087	2e-16
FG1_Contig13868	414	46	19.3937	C02A	MER080476	Mername-AA253 peptidase (Brachydanio rerio) [C02.028]	137	74.4526	4e-57	ref|XP_002579452.1| calpain-7 (C02 family) [Schistosoma mansoni] emb|CAZ35691.1| calpain-7 (C02 family) [Schistosoma mansoni]	137	78.1022	1e-60
FG1_Contig16858	634	68	18.7207	C02A	MER099248	subfamily C2A unassigned peptidases (Strongylocentrotus purpuratus) [C02.UPA]	56	53.5714	1e-13	emb|CAX73750.1| Calpain-B [Schistosoma japonicum]	211	61.1374	7e-75
FG1_Contig27620	371	39	18.3482	C19	MER069100	ubiquitin-specific peptidase 43 [misleading] (Monodelphis domestica) [C19.976]	126	37.3016	8e-13	ref|XP_002196148.1| PREDICTED: ubiquitin specific peptidase 31 [Taeniopygia guttata]	129	35.6589	5e-10
FG1_Contig12506	358	35	17.0643	C19	MER056605	ubiquitin-specific endopeptidase 39 [misleading] (Strongylocentrotus purpuratus) [C19.972]	67	64.1791	4e-22	ref|XP_002573230.1| family C19 non-peptidase homologue (C19 family) [Schistosoma mansoni] emb|CAZ29462.1| family C19 non-peptidase homologue (C19 family) [Schistosoma mansoni]	90	76.6667	1e-36
FG1_Contig17397	716	65	15.8454	C02A	MER111215	Mername-AA253 peptidase (Oryzias latipes) [C02.028]	57	66.6667	1e-16	ref|XP_002579452.1| calpain-7 (C02 family) [Schistosoma mansoni] emb|CAZ35691.1| calpain-7 (C02 family) [Schistosoma mansoni]	231	53.2468	4e-59
FG1_Contig10030	285	25	15.3108	C14A	MER122440	CED-3 peptidase (Schistosoma japonicum) [C14.002]	98	61.2245	3e-29	gb|AAX26691.2| SJCHGC07329 protein [Schistosoma japonicum]	98	61.2245	3e-27
FG1_Contig9894	282	24	14.8547	C78	MER064434	UfSP1 peptidase (Brachydanio rerio) [C78.001]	68	55.8824	5e-17	emb|CAX69363.1| putative Ufm1-specific protease 2 [Schistosoma japonicum]	68	63.2353	6e-22
FG1_Contig12629	362	30	14.4649	C46	MER113644	hedgehog protein (Nasonia vitripennis) [C46.001]	82	32.9268	6e-07	ref|XP_001788921.1| PREDICTED: similar to Desert hedgehog protein precursor (DHH) (HHG-3) [Bos taurus]	115	37.3913	1e-11
FG1_Contig15563	511	42	14.346	C19	MER170091	ubiquitin-specific peptidase 8 (Drosophila willistoni) [C19.011]	101	44.5545	2e-19	gb|AAX27807.2| SJCHGC04287 protein [Schistosoma japonicum]	96	53.125	2e-22
FG1_Contig12231	349	28	14.0034	C78	MER186397	UfSP2 peptidase (Schistosoma mansoni) [C78.002]	28	67.8571	1e-07	gb|ABA40800.1| SJCHGC03363 protein [Schistosoma japonicum]	38	71.0526	4e-10
FG1_Contig25892	889	71	13.9399	C19	MER054062	ubiquitin-specific peptidase 9X (Gallus gallus) [C19.017]	248	50	6e-57	ref|XP_002573190.1| ubiquitin-specific peptidase 9X (C19 family) [Schistosoma mansoni] emb|CAZ29422.1| ubiquitin-specific peptidase 9X (C19 family) [Schistosoma mansoni]	305	46.8852	1e-73
FG1_Contig10182	289	22	13.287	C02A	MER099280	subfamily C2A unassigned peptidases (Schistosoma japonicum) [C02.UPA]	98	67.3469	3e-32	emb|CAX73750.1| Calpain-B [Schistosoma japonicum]	98	67.3469	2e-30
FG1_504738	278	21	13.1849	C19	MER069072	ubiquitin-specific peptidase 24 (Monodelphis domestica) [C19.047]	54	57.4074	3e-10	ref|XP_002605968.1| hypothetical protein BRAFLDRAFT_126572 [Branchiostoma floridae] gb|EEN61978.1| hypothetical protein BRAFLDRAFT_126572 [Branchiostoma floridae]	57	61.4035	8e-11
FG1_Contig16579	600	45	13.0907	C48	MER011030	family C48 unassigned peptidases (Caenorhabditis elegans) [C48.UPW]	99	37.3737	2e-09	ref|XP_002571428.1| hypothetical protein [Schistosoma mansoni] emb|CAZ39113.1| expressed protein [Schistosoma mansoni]	187	51.8717	1e-45
FG1_Contig10364	294	22	13.061	C01A	MER020795	cathepsin L3 {{Fasciola} sp.} (Fasciola gigantica) [C01.129]	97	98.9691	4e-52	gb|ACM67632.1| cathepsin 2L [Fasciola hepatica]	97	100	1e-50
FG1_Contig10912	309	22	12.427	C50	MER185921	family C50 unassigned peptidases (Schistosoma mansoni) [C50.UPW]	79	44.3038	1e-10	ref|XP_002579519.1| family C50 non-peptidase homologue (C50 family) [Schistosoma mansoni] emb|CAZ35758.1| family C50 non-peptidase homologue (C50 family) [Schistosoma mansoni]	91	48.3516	2e-13
FG1_Contig16725	616	42	11.9007	C26	MER200048	family C26 unassigned peptidases (Ocydromia sp. JKM-2006) [C26.UPW]	146	67.1233	1e-55	ref|XP_002581944.1| carbamoyl-phosphate synthetase [Schistosoma mansoni] emb|CAZ38184.1| carbamoyl-phosphate synthetase (glutamine-hydrolysing); dihydro-orotase (C26 family) [Schistosoma mansoni]	193	66.8394	3e-75
FG1_Contig29845	253	17	11.7282	C19	MER126376	family C19 unassigned peptidases (Laccaria bicolor) [C19.UPW]	92	35.8696	1e-07	ref|XP_002575964.1| ubiquitin-specific peptidase 42 (C19 family) [Schistosoma mansoni] emb|CAZ32199.1| ubiquitin-specific peptidase 42 (C19 family) [Schistosoma mansoni]	84	77.381	1e-30
FG1_Contig36835	328	22	11.7071	C01A	MER028760	fascipain B (Fasciola gigantica) [C01.115]	108	68.5185	9e-43	gb|AAO73002.1| cathepsin B [Fasciola gigantica]	108	68.5185	7e-41
FG1_Contig31534	245	15	10.6863	C19	MER056386	ubiquitin-specific peptidase 8 (Bos taurus) [C19.011]	73	35.6164	6e-07	ref|XP_002576871.1| ubiquitin-specific peptidase 8 (C19 family) [Schistosoma mansoni] emb|CAZ33108.1| ubiquitin-specific peptidase 8 (C19 family) [Schistosoma mansoni]	29	79.3103	6e-06
FG1_Contig8556	254	15	10.3077	C48	MER185887	Ulp1 peptidase {{Drosophila}-type} (Schistosoma mansoni) [C48.024]	43	74.4186	4e-14	ref|XP_002574769.1| family C48 unassigned peptidase (C48 family) [Schistosoma mansoni] emb|CAZ31002.1| family C48 unassigned peptidase (C48 family) [Schistosoma mansoni]	78	73.0769	1e-27
FG1_Contig12796	368	21	9.96033	C19	MER053653	ubiquitin-specific peptidase 36 (Canis familiaris) [C19.042]	124	39.5161	7e-22	ref|XP_002575964.1| ubiquitin-specific peptidase 42 (C19 family) [Schistosoma mansoni] emb|CAZ32199.1| ubiquitin-specific peptidase 42 (C19 family) [Schistosoma mansoni]	122	73.7705	3e-48
FG1_Contig10419	296	16	9.43475	C19	MER056453	ubiquitin-specific peptidase 16 (Bos taurus) [C19.021]	99	37.3737	1e-10	ref|XP_002578593.1| ubiquitin-specific peptidase 16 (C19 family) [Schistosoma mansoni] emb|CAZ34831.1| ubiquitin-specific peptidase 16 (C19 family) [Schistosoma mansoni]	98	52.0408	1e-20
Metallo protease
FG1_Contig6454	638	1400	383.01	M17	MER189014	leucine aminopeptidase {{Fasciola}-type} (Fasciola gigantica) [M17.011]	200	100	1e-112	gb|ACS94976.1| leucine amino peptidase [Fasciola gigantica]	207	99.0338	1e-113
FG1_Contig19957	868	1578	317.314	M17	MER189014	leucine aminopeptidase {{Fasciola}-type} (Fasciola gigantica) [M17.011]	242	100	1e-135	gb|ACS94976.1| leucine amino peptidase [Fasciola gigantica]	242	100	1e-133
FG1_Contig4274	470	677	251.416	M17	MER173211	leucine aminopeptidase {{Fasciola}-type} (Clonorchis sinensis) [M17.011]	70	78.5714	1e-27	gb|ACR27084.1| leucine aminopeptidase 1 [Clonorchis sinensis]	75	77.3333	3e-28
FG1_Contig18837	1545	2142	241.988	M17	MER081108	PwLAP aminopeptidase (Paragonimus westermani) [M17.012]	417	65.4676	1e-155	gb|ACR27084.1| leucine aminopeptidase 1 [Clonorchis sinensis]	471	63.6943	1e-170
FG1_Contig9588	1853	2198	207.04	M41	MER102730	i-AAA peptidase (Dasypus novemcinctus) [M41.004]	114	33.3333	1e-07	gb|AAW27581.1| SJCHGC09453 protein [Schistosoma japonicum]	509	84.8723	0
FG1_Contig20186	1806	1973	190.683	M24B	MER126803	Xaa-Pro dipeptidase {eukaryote} (Schistosoma japonicum) [M24.007]	295	73.5593	1e-132	gb|AAW25470.1| SJCHGC06332 protein [Schistosoma japonicum]	497	66.5996	0
FG1_Contig15448	889	842	165.315	M41	MER102730	i-AAA peptidase (Dasypus novemcinctus) [M41.004]	110	34.5455	1e-06	gb|AAW27581.1| SJCHGC09453 protein [Schistosoma japonicum]	295	81.6949	1e-135
FG1_Contig14192	1712	1445	147.322	M41	MER102730	i-AAA peptidase (Dasypus novemcinctus) [M41.004]	131	35.8779	4e-10	gb|ABB13463.1| 26S proteasome subunit RPT6 [Schistosoma mansoni]	380	92.1053	0
FG1_Contig15139	483	385	139.128	M16B	MER138321	mitochondrial processing peptidase beta subunit domain 2 (Drosophila persimilis) [M16.980]	129	55.814	2e-40	gb|ABK91804.1| peptidase M16 precursor [Clonorchis sinensis]	137	84.6715	1e-65
FG1_Contig20565	1073	812	132.087	M16B	MER137694	mitochondrial processing peptidase beta-subunit (Clonorchis sinensis) [M16.003]	230	90	1e-122	gb|ABK91804.1| peptidase M16 precursor [Clonorchis sinensis]	326	84.9693	1e-165
FG1_Contig20459	1442	1012	122.495	M41	MER102730	i-AAA peptidase (Dasypus novemcinctus) [M41.004]	151	33.7748	3e-08	gb|ABB71588.1| 26S proteasome subunit ATPase 4 [Schistosoma mansoni]	407	96.0688	0
FG1_Contig21008	2153	1477	119.74	M41	MER002198	i-AAA peptidase (Schistosoma mansoni) [M41.004]	225	77.3333	1e-94	emb|CAX70433.1| YME1-Like (Mitochondrial Escape) AAA protease [Schistosoma japonicum]	575	77.7391	0
FG1_Contig26349	1161	725	108.995	M24A	MER179871	methionyl aminopeptidase 1 (Schistosoma japonicum) [M24.001]	273	53.1136	2e-76	ref|XP_002578103.1| peptidase [Schistosoma mansoni] emb|CAZ34341.1| Mername-AA021 peptidase (M24 family) [Schistosoma mansoni]	275	51.2727	9e-75
FG1_Contig30539	2078	1265	106.254	M01	MER104516	leukotriene A4 hydrolase (Sorex araneus) [M01.004]	242	57.0248	5e-77	ref|XP_002572232.1| leukotriene A4 hydrolase (M01 family) [Schistosoma mansoni] emb|CAZ28463.1| leukotriene A4 hydrolase (M01 family) [Schistosoma mansoni]	613	54.9755	0
FG1_Contig19662	2209	1296	102.403	M38	MER078820	dihydropyrimidinase related protein-5 (Xenopus tropicalis) [M38.978]	397	29.9748	4e-40	ref|NP_001069468.1| dihydropyrimidinase-like 2 [Bos taurus] sp|O02675.1|DPYL2_BOVIN RecName: Full=Dihydropyrimidinase-related protein 2; Short=DRP-2; AltName: Full=Neural-specific protein NSP60 gb|AAB80618.1| neural specific protein CRMP-2 [Bos taurus] gb|AAI14154.1| Dihydropyrimidinase-like 2 [Bos taurus]	615	30.0813	1e-48
FG1_Contig16093	1421	792	97.2822	M41	MER102730	i-AAA peptidase (Dasypus novemcinctus) [M41.004]	111	36.9369	2e-06	ref|XP_002572709.1| 26S protease regulatory subunit [Schistosoma mansoni] emb|CAZ28941.1| 26S protease regulatory subunit, putative [Schistosoma mansoni]	433	91.9169	0
FG1_Contig18560	1023	560	95.5465	M67A	MER021971	Poh1 peptidase (Schistosoma mansoni) [M67.001]	313	86.262	1e-156	gb|AAC02298.1| Pad1 homolog [Schistosoma mansoni]	313	86.262	1e-154
FG1_Contig22091	2528	1304	90.0332	M24A	MER035520	methionyl aminopeptidase 2 (Schistosoma japonicum) [M24.002]	323	84.8297	1e-167	gb|ABL11480.1| putative methionine aminopeptidase 2 [Clonorchis sinensis]	368	85.0543	0
FG1_Contig23896	5299	2589	85.2787	M14X	MER033175	cytosolic carboxypeptidase (Mus musculus) [M14.954]	226	48.6726	4e-54	ref|XP_002581354.1| family M14 non-peptidase homologue (M14 family) [Schistosoma mansoni] emb|CAZ37593.1| family M14 non-peptidase homologue (M14 family) [Schistosoma mansoni]	405	58.5185	1e-139
FG1_Contig21113	2402	968	70.3404	M14B	MER033179	cytosolic carboxypeptidase 1 (Homo sapiens) [M14.028]	203	48.2759	2e-47	ref|XP_002572025.1| peptidase [Schistosoma mansoni] emb|CAZ28255.1| Mername-AA217 hypothetical peptidase (M14 family) [Schistosoma mansoni]	334	60.7784	1e-115
FG1_Contig19606	1277	482	65.8807	M13	MER053345	Kell blood-group protein (Pan troglodytes) [M13.090]	185	25.9459	3e-06	ref|XP_002575973.1| ankyrin repeat-containing [Schistosoma mansoni] emb|CAZ32208.1| ankyrin repeat-containing, putative [Schistosoma mansoni]	273	53.1136	9e-76
FG1_Contig20197	892	323	63.2033	M67X	MER078897	eukaryotic translation initiation factor 3 subunit 5 (Xenopus tropicalis) [M67.974]	269	42.3792	6e-54	gb|AAW26064.1| SJCHGC06192 protein [Schistosoma japonicum] emb|CAX72792.1| Eukaryotic translation initiation factor 3 subunit 5 [Schistosoma japonicum] emb|CAX72848.1| Eukaryotic translation initiation factor 3 subunit 5 [Schistosoma japonicum] emb|CAX82498.1| Eukaryotic translation initiation factor 3 subunit 5 [Schistosoma japonicum] emb|CAX82627.1| Eukaryotic translation initiation factor 3 su…	273	67.3993	1e-100
FG1_Contig21880	878	301	59.8376	M13	MER053345	Kell blood-group protein (Pan troglodytes) [M13.090]	160	26.875	3e-07	ref|XP_002577681.1| 26S proteasome subunit [Schistosoma mansoni] emb|CAZ33919.1| 26S proteasome subunit P28-related [Schistosoma mansoni]	232	54.7414	7e-63
FG1_Contig26766	1346	459	59.521	M41	MER102730	i-AAA peptidase (Dasypus novemcinctus) [M41.004]	121	34.7107	1e-06	ref|XP_002573178.1| 26S protease regulatory subunit S10b [Schistosoma mansoni] emb|CAZ29410.1| 26S protease regulatory subunit S10b, putative [Schistosoma mansoni]	394	92.6396	0
FG1_Contig10181	289	88	53.148	M03A	MER187718	subfamily M3A unassigned peptidases (Schistosoma mansoni) [M03.UPA]	93	65.5914	3e-32	ref|XP_002574401.1| thimet oligopeptidase (M03 family) [Schistosoma mansoni] emb|CAZ30634.1| thimet oligopeptidase (M03 family) [Schistosoma mansoni]	93	65.5914	2e-30
FG1_Contig14958	2658	800	52.5336	M03A	MER187719	mitochondrial intermediate peptidase (Schistosoma mansoni) [M03.006]	672	55.9524	0	ref|XP_002578698.1| mitochondrial intermediate peptidase (M03 family) [Schistosoma mansoni] emb|CAZ34936.1| mitochondrial intermediate peptidase (M03 family) [Schistosoma mansoni]	749	54.3391	0
FG1_Contig24165	521	154	51.5923	M67A	MER180906	Jab1/MPN domain metalloenzyme (Apis mellifera) [M67.002]	107	70.0935	2e-38	ref|XP_623806.1| PREDICTED: similar to COP9 constitutive photomorphogenic homolog subunit 5 isoform 1 [Apis mellifera] ref|XP_623836.1| PREDICTED: similar to COP9 constitutive photomorphogenic homolog subunit 5 isoform 2 [Apis mellifera]	128	67.1875	4e-42
FG1_Contig18474	4103	1204	51.2185	M12B	MER103526	ADAMTS20 peptidase {mouse-type} (Cavia porcellus) [M12.188]	222	28.8288	3e-11	ref|XP_002575734.1| adamts (A disintegrin and metalloprotease [Schistosoma mansoni] emb|CAZ31968.1| adamts (A disintegrin and metalloprotease, putative [Schistosoma mansoni]	568	63.3803	0
FG1_Contig13708	406	113	48.5797	M28A	MER061717	glutaminyl cyclase (Macaca mulatta) [M28.974]	140	49.2857	3e-29	ref|XP_001101173.1| PREDICTED: glutaminyl-peptide cyclotransferase [Macaca mulatta]	140	49.2857	3e-27
FG1_Contig16961	650	173	46.4553	M24B	MER122866	mitochondrial intermediate cleaving peptidase 55 kDa (Schistosoma japonicum) [M24.026]	133	58.6466	3e-43	gb|AAW27652.1| SJCHGC00876 protein [Schistosoma japonicum]	140	59.2857	2e-44
FG1_Contig23201	2808	714	44.3816	M01	MER126531	cytosol alanyl aminopeptidase (Nematostella vectensis) [M01.010]	223	64.1256	4e-84	ref|XP_002580160.1| cytosol alanyl aminopeptidase (M01 family) [Schistosoma mansoni] emb|CAZ36399.1| cytosol alanyl aminopeptidase (M01 family) [Schistosoma mansoni]	905	53.0387	0
FG1_Contig25115	1371	345	43.9222	M18	MER189140	aspartyl aminopeptidase (Schistosoma mansoni) [M18.002]	450	57.5556	1e-146	ref|XP_002578171.1| aspartyl aminopeptidase (M18 family) [Schistosoma mansoni] emb|CAZ34409.1| aspartyl aminopeptidase (M18 family) [Schistosoma mansoni]	451	57.6497	2.33e-156
FG1_Contig12611	362	89	42.9125	M03A	MER103219	thimet oligopeptidase (Schistosoma japonicum) [M03.001]	56	67.8571	2e-18	gb|AAX26445.2| SJCHGC06754 protein [Schistosoma japonicum]	62	67.7419	4e-19
FG1_Contig25394	1903	464	42.558	M41	MER190702	family M41 unassigned peptidases (Schistosoma mansoni) [M41.UPW]	227	84.5815	1e-110	gb|AAO32953.1| putative AFG3-like protein 2 [Schistosoma japonicum]	469	87.8465	0
FG1_Contig34588	1214	294	42.2699	M67A	MER035522	26S proteasome non-ATPase regulatory subunit 7 (Schistosoma japonicum) [M67.973]	106	82.0755	1e-44	gb|ACE06915.1| unknown [Schistosoma japonicum] emb|CAX72719.1| putative 26S proteasome non-ATPase regulatory subunit 7 [Schistosoma japonicum] emb|CAX72849.1| putative 26S proteasome non-ATPase regulatory subunit 7 [Schistosoma japonicum]	272	78.3088	1e-116
FG1_Contig14157	429	98	39.8723	M48A	MER190825	farnesylated-protein converting enzyme 1 (Schistosoma mansoni) [M48.003]	125	61.6	1e-41	ref|XP_002579352.1| farnesylated-protein converting enzyme 1 (M48 family) [Schistosoma mansoni] emb|CAZ35591.1| farnesylated-protein converting enzyme 1 (M48 family) [Schistosoma mansoni]	125	61.6	8e-40
FG1_Contig25742	1262	273	37.7577	M50A	MER190941	S2P peptidase (Schistosoma mansoni) [M50.001]	243	69.5473	1e-103	ref|XP_002576720.1| S2P peptidase (M50 family) [Schistosoma mansoni] emb|CAZ32957.1| S2P peptidase (M50 family) [Schistosoma mansoni]	284	68.3099	1e-118
FG1_Contig18638	1055	227	37.5557	M38	MER078828	dihydropyrimidinase related protein-1 (Brachydanio rerio) [M38.974]	122	45.082	3e-19	ref|XP_002569804.1| dihydropyrimidinase related protein-1 (M38 family) [Schistosoma mansoni] emb|CAY17194.1| dihydropyrimidinase related protein-1 (M38 family) [Schistosoma mansoni]	302	49.3377	6e-75
FG1_Contig18825	1202	251	36.4478	M03A	MER187718	subfamily M3A unassigned peptidases (Schistosoma mansoni) [M03.UPA]	383	63.1854	1e-142	ref|XP_002574401.1| thimet oligopeptidase (M03 family) [Schistosoma mansoni] emb|CAZ30634.1| thimet oligopeptidase (M03 family) [Schistosoma mansoni]	383	63.1854	1e-141
FG1_Contig19335	2621	531	35.3614	M49	MER190925	dipeptidyl-peptidase III (Schistosoma mansoni) [M49.001]	249	65.8635	8e-96	ref|XP_002573349.1| dipeptidyl-peptidase III (M49 family) [Schistosoma mansoni] emb|CAZ29581.1| dipeptidyl-peptidase III (M49 family) [Schistosoma mansoni]	665	62.1053	0
FG1_Contig11580	328	63	33.525	M14B	MER164180	subfamily M14B unassigned peptidases (Drosophila erecta) [M14.UPB]	121	48.7603	5e-28	ref|XP_002578162.1| metallocarboxypeptidase D peptidase unit 2 (M14 family) [Schistosoma mansoni] emb|CAZ34400.1| metallocarboxypeptidase D peptidase unit 2 (M14 family) [Schistosoma mansoni]	108	58.3333	7e-31
FG1_Contig18751	1149	215	32.6603	M14X	MER098476	cytosolic carboxypeptidase 6 (Equus caballus) [M14.027]	142	62.6761	2e-52	ref|XP_002192640.1| PREDICTED: similar to Cytosolic carboxypeptidase 6 [Taeniopygia guttata]	311	63.3441	1e-119
FG1_Contig18665	1080	189	30.545	M24A	MER111713	methionyl aminopeptidase 1 (Gasterosteus aculeatus) [M24.001]	258	64.7287	1e-101	ref|XP_002575045.1| methionyl aminopeptidase 1 (M24 family) [Schistosoma mansoni] emb|CAZ31278.1| methionyl aminopeptidase 1 (M24 family) [Schistosoma mansoni]	333	74.4745	1e-149
FG1_Contig10526	298	52	30.4572	M28B	MER190366	subfamily M28B unassigned peptidases (Schistosoma mansoni) [M28.UPB]	97	55.6701	1e-27	ref|XP_002573904.1| NAALADASE L peptidase (M28 family) [Schistosoma mansoni] emb|CAZ30137.1| NAALADASE L peptidase (M28 family) [Schistosoma mansoni]	97	55.6701	9e-26
FG1_Contig24698	850	143	29.3643	M38	MER078820	dihydropyrimidinase related protein-5 (Xenopus tropicalis) [M38.978]	272	31.6176	7e-33	gb|AAW27653.1| SJCHGC06171 protein [Schistosoma japonicum]	286	44.0559	6e-64
FG1_Contig18038	854	138	28.2048	M38	MER043770	dihydropyrimidinase (Drosophila melanogaster) [M38.973]	51	76.4706	2e-17	ref|XP_002579613.1| dihydropyrimidinase (M38 family) [Schistosoma mansoni] emb|CAZ35852.1| dihydropyrimidinase (M38 family) [Schistosoma mansoni]	221	66.5158	1e-83
FG1_Contig16224	912	147	28.1336	M67A	MER077615	COP9 signalosome subunit 6 (Xenopus tropicalis) [M67.972]	103	50.4854	6e-23	ref|XP_002572319.1| COP9 signalosome subunit 6 (M67 family) [Schistosoma mansoni] emb|CAZ28550.1| COP9 signalosome subunit 6 (M67 family) [Schistosoma mansoni]	194	81.9588	2e-86
FG1_Contig19250	1734	270	27.178	M14B	MER110928	metallocarboxypeptidase D peptidase unit 2 (Oryzias latipes) [M14.016]	154	28.5714	2e-07	ref|XP_002578162.1| metallocarboxypeptidase D peptidase unit 2 (M14 family) [Schistosoma mansoni] emb|CAZ34400.1| metallocarboxypeptidase D peptidase unit 2 (M14 family) [Schistosoma mansoni]	513	35.0877	5e-73
FG1_Contig16567	606	88	25.3462	M16C	MER188964	eupitrilysin (Schistosoma mansoni) [M16.009]	143	76.2238	2e-60	ref|XP_002575766.1| eupitrilysin (M16 family) [Schistosoma mansoni] emb|CAZ32001.1| eupitrilysin (M16 family) [Schistosoma mansoni]	202	70.297	8e-78
FG1_Contig15382	498	67	23.4827	M38	MER080807	dihydro-orotase (Xenopus tropicalis) [M38.972]	71	54.9296	3e-17	ref|XP_002581388.1| aspartate carbamoyltransferase [Schistosoma mansoni] emb|CAZ37627.1| aspartate carbamoyltransferase; carbamoyl-phosphate synthetase (glutamine-hydrolysing); dihydro-orotase (M38 family); dihydroorotase [Schistosoma mansoni]	166	58.4337	8e-48
FG1_Contig18756	1130	152	23.4783	M38	MER078097	dihydropyrimidinase (Takifugu rubripes) [M38.973]	348	51.1494	3e-97	emb|CAX69802.1| dihydropyrimidinase-like 2 [Schistosoma japonicum]	371	56.8733	1e-118
FG1_Contig13301	400	51	22.2542	M08	MER187894	family M8 unassigned peptidases (Schistosoma mansoni) [M08.UPW]	119	45.3782	2e-27	emb|CAX69323.1| Leishmanolysin homolog precursor [Schistosoma japonicum]	121	47.1074	8e-29
FG1_Contig25897	674	78	20.1993	M08	MER187896	family M8 unassigned peptidases (Schistosoma mansoni) [M08.UPW]	140	30	6e-16	emb|CAX69323.1| Leishmanolysin homolog precursor [Schistosoma japonicum]	137	32.8467	1e-15
FG1_Contig16235	566	65	20.0447	M38	MER033185	hypothetical protein like 5730457F11RIK (Mus musculus) [M38.979]	161	49.0683	6e-34	emb|CAX73390.1| amidohydrolase domain containing 2 [Schistosoma japonicum]	189	59.2593	4e-59
FG1_Contig9916	430	49	19.8898	M08	MER187896	family M8 unassigned peptidases (Schistosoma mansoni) [M08.UPW]	129	38.7597	3e-23	emb|CAX69323.1| Leishmanolysin homolog precursor [Schistosoma japonicum]	136	42.6471	6e-27
FG1_Contig11973	361	41	19.8234	M08	MER165345	leishmanolysin-2 (Strongylocentrotus purpuratus) [M08.003]	98	35.7143	2e-13	ref|XP_001203887.1| PREDICTED: similar to leishmanolysin-like (metallopeptidase M8 family) [Strongylocentrotus purpuratus] ref|XP_785477.2| PREDICTED: similar to leishmanolysin-like (metallopeptidase M8 family) [Strongylocentrotus purpuratus]	98	35.7143	1e-11
FG1_Contig16115	555	61	19.184	M38	MER080807	dihydro-orotase (Xenopus tropicalis) [M38.972]	185	54.0541	6e-52	ref|XP_002581388.1| aspartate carbamoyltransferase [Schistosoma mansoni] emb|CAZ37627.1| aspartate carbamoyltransferase; carbamoyl-phosphate synthetase (glutamine-hydrolysing); dihydro-orotase (M38 family); dihydroorotase [Schistosoma mansoni]	184	67.3913	4e-71
FG1_Contig33178	441	48	18.9979	M28X	MER027473	Fxna peptidase (Rattus norvegicus) [M28.018]	146	54.1096	7e-42	ref|XP_002580556.1| Fxna peptidase (M28 family) [Schistosoma mansoni] emb|CAZ36795.1| Fxna peptidase (M28 family) [Schistosoma mansoni]	146	57.5342	2e-44
FG1_Contig11676	331	36	18.9835	M14B	MER113255	metallocarboxypeptidase D peptidase unit 2 (Gallus gallus) [M14.016]	94	48.9362	3e-20	emb|CAX82614.1| carboxypeptidase N, polypeptide 1, 50kD [Schistosoma japonicum]	93	53.7634	2e-22
FG1_Contig23032	246	25	17.7381	M48A	MER064754	farnesylated-protein converting enzyme 1 (Taenia solium) [M48.003]	58	77.5862	2e-20	gb|AAZ80484.1| membrane-associated metalloproteinase [Taenia solium]	63	73.0159	3e-19
FG1_Contig15167	485	49	17.6342	M13	MER027380	family M13 unassigned peptidases (Locusta migratoria) [M13.UPW]	160	51.25	8e-46	emb|CAX82880.1| endothelin converting enzyme 2 [Schistosoma japonicum]	159	71.0692	7e-65
FG1_Contig18121	879	87	17.2756	M16C	MER188964	eupitrilysin (Schistosoma mansoni) [M16.009]	290	52.7586	9e-82	ref|XP_002575766.1| eupitrilysin (M16 family) [Schistosoma mansoni] emb|CAZ32001.1| eupitrilysin (M16 family) [Schistosoma mansoni]	290	52.7586	6e-80
FG1_Contig27380	213	21	17.2085	M48A	MER190825	farnesylated-protein converting enzyme 1 (Schistosoma mansoni) [M48.003]	62	70.9677	1e-22	ref|XP_002579352.1| farnesylated-protein converting enzyme 1 (M48 family) [Schistosoma mansoni] emb|CAZ35591.1| farnesylated-protein converting enzyme 1 (M48 family) [Schistosoma mansoni]	70	71.4286	2e-24
FG1_Contig15389	498	48	16.8234	M28X	MER098023	nicalin (Ornithorhynchus anatinus) [M28.978]	94	47.8723	1e-20	gb|AAX26653.2| SJCHGC04392 protein [Schistosoma japonicum]	159	52.2013	6e-40
FG1_Contig14384	438	39	15.5415	M67C	MER191265	subfamily M67C unassigned peptidases (Schistosoma mansoni) [M67.UPC]	54	62.963	3e-15	emb|CAX73442.1| STAM binding protein [Schistosoma japonicum]	74	59.4595	3e-18
FG1_Contig30130	342	30	15.3108	M38	MER033184	hypothetical protein like 5730457F11RIK (Homo sapiens) [M38.979]	74	50	2e-16	emb|CAX73390.1| amidohydrolase domain containing 2 [Schistosoma japonicum]	88	54.5455	2e-23
FG1_Contig15293	492	43	15.2548	M08	MER187893	family M8 unassigned peptidases (Schistosoma mansoni) [M08.UPW]	148	67.5676	3e-60	ref|XP_002572383.1| invadolysin (M08 family) [Schistosoma mansoni] emb|CAZ28614.1| invadolysin (M08 family) [Schistosoma mansoni]	148	67.5676	1e-58
FG1_Contig36693	424	37	15.2313	M08	MER187894	family M8 unassigned peptidases (Schistosoma mansoni) [M08.UPW]	136	46.3235	9e-29	ref|XP_002573909.1| leishmanolysin-2 (M08 family) [Schistosoma mansoni] emb|CAZ30142.1| leishmanolysin-2 (M08 family) [Schistosoma mansoni]	136	46.3235	6e-27
FG1_Contig12177	347	30	15.0902	M50A	MER190941	S2P peptidase (Schistosoma mansoni) [M50.001]	103	68.932	2e-36	ref|XP_002576720.1| S2P peptidase (M50 family) [Schistosoma mansoni] emb|CAZ32957.1| S2P peptidase (M50 family) [Schistosoma mansoni]	111	66.6667	3e-36
FG1_Contig24933	226	19	14.674	M28B	MER190366	subfamily M28B unassigned peptidases (Schistosoma mansoni) [M28.UPB]	74	52.7027	5e-18	ref|XP_002573904.1| NAALADASE L peptidase (M28 family) [Schistosoma mansoni] emb|CAZ30137.1| NAALADASE L peptidase (M28 family) [Schistosoma mansoni]	74	52.7027	4e-16
FG1_491677	227	19	14.6093	M20A	MER071632	aminoacylase (Apis mellifera) [M20.973]	75	50.6667	3e-14	ref|XP_002573411.1| aminoacylase (M20 family) [Schistosoma mansoni] emb|CAZ29643.1| aminoacylase (M20 family) [Schistosoma mansoni]	75	61.3333	9e-20
FG1_Contig14247	431	35	14.174	M13	MER176945	family M13 unassigned peptidases (Pediculus humanus) [M13.UPW]	142	30.9859	1e-11	emb|CAX82880.1| endothelin converting enzyme 2 [Schistosoma japonicum]	141	51.0638	1e-38
FG1_Contig16387	579	46	13.867	M13	MER148849	family M13 unassigned peptidases (Ciona intestinalis) [M13.UPW]	73	57.5342	6e-20	emb|CAX82880.1| endothelin converting enzyme 2 [Schistosoma japonicum]	74	74.3243	2e-27
FG1_Contig15445	502	39	13.5601	M12A	MER188188	subfamily M12A unassigned peptidases (Schistosoma mansoni) [M12.UPA]	165	95.7576	2e-95	ref|XP_002573725.1| subfamily M12A unassigned peptidase (M12 family) [Schistosoma mansoni] emb|CAZ29957.1| subfamily M12A unassigned peptidase (M12 family) [Schistosoma mansoni]	165	95.7576	7e-94
FG1_Contig7413	233	17	12.7349	M28A	MER015105	glutaminyl cyclase (Drosophila melanogaster) [M28.974]	78	43.5897	5e-11	emb|CAX73278.1| glutaminyl-peptide cyclotransferase [Schistosoma japonicum]	76	55.2632	1e-17
FG1_Contig29838	249	18	12.6176	M50A	MER190941	S2P peptidase (Schistosoma mansoni) [M50.001]	38	63.1579	9e-09	ref|XP_002576720.1| S2P peptidase (M50 family) [Schistosoma mansoni] emb|CAZ32957.1| S2P peptidase (M50 family) [Schistosoma mansoni]	38	63.1579	7e-07
FG1_Contig25457	528	38	12.5618	M16A	MER062978	subfamily M16A unassigned peptidases (Vibrio splendidus) [M16.UPA]	179	27.933	4e-11	ref|XP_002577706.1| nardilysin (M16 family) [Schistosoma mansoni] emb|CAZ33944.1| nardilysin (M16 family) [Schistosoma mansoni]	159	27.673	2e-12
FG1_Contig28177	267	19	12.4207	M28X	MER053665	nicalin (Canis familiaris) [M28.978]	46	54.3478	3e-07	ref|XP_002579900.1| nicalin (M28 family) [Schistosoma mansoni] emb|CAZ36139.1| nicalin (M28 family) [Schistosoma mansoni]	77	58.4416	5e-20
FG1_Contig9279	269	19	12.3283	M38	MER033184	hypothetical protein like 5730457F11RIK (Homo sapiens) [M38.979]	87	44.8276	1e-17	emb|CAX73390.1| amidohydrolase domain containing 2 [Schistosoma japonicum]	88	47.7273	2e-20
FG1_Contig12886	377	26	12.0374	M22	MER189508	Kae1 putative peptidase (Schistosoma mansoni) [M22.003]	89	85.3933	2e-38	ref|XP_002572707.1| Kae1 peptidase (M22 family) [Schistosoma mansoni] emb|CAZ28939.1| Kae1 putative peptidase (M22 family) [Schistosoma mansoni]	111	80.1802	6e-45
FG1_504238	276	19	12.0156	M24B	MER189855	Xaa-Pro dipeptidase {bacteria-type} (Perkinsus marinus) [M24.003]	77	57.1429	5e-18	ref|XP_002576313.1| aminopeptidase P1 (M24 family) [Schistosoma mansoni] emb|CAZ32550.1| aminopeptidase P1 (M24 family) [Schistosoma mansoni]	78	71.7949	4e-23
FG1_Contig32171	292	20	11.955	M08	MER187893	family M8 unassigned peptidases (Schistosoma mansoni) [M08.UPW]	77	48.0519	6e-15	ref|XP_002572383.1| invadolysin (M08 family) [Schistosoma mansoni] emb|CAZ28614.1| invadolysin (M08 family) [Schistosoma mansoni]	93	50.5376	6e-19
FG1_Contig16338	575	37	11.2315	M12A	MER188189	subfamily M12A unassigned peptidases (Schistosoma mansoni) [M12.UPA]	174	45.977	7e-43	ref|XP_002576064.1| SpAN g.p. (M12 family) [Schistosoma mansoni] emb|CAZ32299.1| SpAN g.p. (M12 family) [Schistosoma mansoni]	188	46.2766	4e-45
FG1_Contig25374	210	13	10.805	M14B	MER188578	carboxypeptidase M (Tribolium castaneum) [M14.006]	67	56.7164	1e-17	ref|XP_002578162.1| metallocarboxypeptidase D peptidase unit 2 (M14 family) [Schistosoma mansoni] emb|CAZ34400.1| metallocarboxypeptidase D peptidase unit 2 (M14 family) [Schistosoma mansoni]	67	61.194	5e-20
FG1_Contig10894	309	19	10.7324	M20A	MER013441	aminoacylase (Arabidopsis thaliana) [M20.973]	102	50	3e-29	ref|XP_002012860.1| GL23826 [Drosophila persimilis] gb|EDW23846.1| GL23826 [Drosophila persimilis]	104	59.6154	2e-26
FG1_496867	244	15	10.7301	M13	MER002285	family M13 unassigned peptidases (Caenorhabditis elegans) [M13.UPW]	70	38.5714	8e-07	emb|CAX82880.1| endothelin converting enzyme 2 [Schistosoma japonicum]	76	44.7368	2e-13
FG1_Contig9264	268	16	10.4205	M14B	MER107623	metallocarboxypeptidase D peptidase unit 2 (Nematostella vectensis) [M14.016]	73	57.5342	2e-19	ref|XP_001633785.1| predicted protein [Nematostella vectensis] gb|EDO41722.1| predicted protein [Nematostella vectensis]	73	57.5342	1e-17
FG1_521388	403	24	10.3946	M22	MER189507	OSGEPL1-like protein (Schistosoma mansoni) [M22.004]	125	60	3e-36	ref|XP_002572015.1| peptidase [Schistosoma mansoni] emb|CAZ28245.1| Mername-AA018 peptidase (M22 family) [Schistosoma mansoni]	125	60	2e-34
FG1_Contig13017	377	22	10.1855	M01	MER031599	Tata binding protein associated factor (Mus musculus) [M01.972]	58	50	4e-12	ref|XP_002572728.1| Tata binding protein associated factor (M01 family) [Schistosoma mansoni] emb|CAZ28960.1| Tata binding protein associated factor (M01 family) [Schistosoma mansoni]	123	73.9837	3e-49
FG1_496165	242	13	9.37627	M38	MER034718	1300019j08rik protein (Mus musculus) [M38.980]	44	68.1818	2e-14	ref|NP_001007888.1| amidohydrolase domain containing 1 [Xenopus (Silurana) tropicalis] sp|Q68EP2.1|HUTI_XENTR RecName: Full=Probable imidazolonepropionase; AltName: Full=Amidohydrolase domain-containing protein 1 gb|AAH80159.1| MGC89894 protein [Xenopus (Silurana) tropicalis]	69	57.971	2e-16
FG1_Contig6908	242	13	9.37627	M38	MER033186	1300019j08rik protein (Homo sapiens) [M38.980]	73	52.0548	7e-17	ref|XP_002189580.1| PREDICTED: similar to putative protein product of HMFT1272 [Taeniopygia guttata]	73	53.4247	4e-16
FG1_Contig10584	300	16	9.30896	M08	MER187893	family M8 unassigned peptidases (Schistosoma mansoni) [M08.UPW]	80	62.5	9e-27	ref|XP_002572383.1| invadolysin (M08 family) [Schistosoma mansoni] emb|CAZ28614.1| invadolysin (M08 family) [Schistosoma mansoni]	80	62.5	7e-25
FG1_Contig28526	291	15	8.99706	M12B	MER005084	SUP-17 peptidase {{Caenorhabditis elegans}} (Caenorhabditis elegans) [M12.328]	106	53.7736	7e-22	ref|XP_002575735.1| Kuzbanian peptidase (M12 family); dihydroceramide desaturase [Schistosoma mansoni] emb|CAZ31969.1| Kuzbanian peptidase (M12 family); dihydroceramide desaturase [Schistosoma mansoni]	103	63.1068	5e-31
FG1_Contig32086	219	11	8.767	M20A	MER038711	aminoacylase (Brachydanio rerio) [M20.973]	60	53.3333	5e-14	ref|XP_002097104.1| GE24683 [Drosophila yakuba] gb|EDW96816.1| GE24683 [Drosophila yakuba]	55	63.6364	8e-11
FG1_Contig26531	367	17	8.0851	M14B	MER078761	carboxypeptidase E (Brachydanio rerio) [M14.005]	82	50	4e-20	emb|CAX82614.1| carboxypeptidase N, polypeptide 1, 50kD [Schistosoma japonicum]	96	53.125	1e-25
FG1_Contig35818	243	10	7.18284	M24B	MER102486	aminopeptidase P1 (Dasypus novemcinctus) [M24.009]	68	50	4e-11	emb|CAX73423.1| putative X-prolyl aminopeptidase [Schistosoma japonicum]	72	68.0556	2e-21
FG1_Contig37052	251	10	6.9539	M20A	MER098439	aminoacylase (Equus caballus) [M20.973]	83	44.5783	2e-14	ref|XP_001492888.1| PREDICTED: similar to aminoacylase 1 [Equus caballus]	83	44.5783	1e-12
FG1_Contig39135	310	12	6.7565	M12B	MER035799	Kuzbanian peptidase {non-mammalian} (Anopheles gambiae) [M12.211]	53	43.3962	3e-06	ref|XP_002575735.1| Kuzbanian peptidase (M12 family); dihydroceramide desaturase [Schistosoma mansoni] emb|CAZ31969.1| Kuzbanian peptidase (M12 family); dihydroceramide desaturase [Schistosoma mansoni]	127	43.3071	6e-21
FG1_Contig34056	264	9	5.95033	M22	MER164351	Kae1 putative peptidase (Schistosoma japonicum) [M22.003]	88	81.8182	6e-39	gb|AAX26242.2| SJCHGC03594 protein [Schistosoma japonicum]	88	81.8182	5e-37
Serine protease
FG1_Contig1274	619	4082	1151.02	S10	MER117770	serine carboxypeptidase A (Schistosoma japonicum) [S10.002]	190	57.8947	3e-58	emb|CAX73718.1| Lysosomal protective protein precursor [Schistosoma japonicum]	192	55.2083	5e-57
FG1_Contig21631	452	2660	1027.18	S28	MER144534	lysosomal Pro-Xaa carboxypeptidase (Clonorchis sinensis) [S28.001]	146	58.2192	3e-45	gb|ABJ89817.1| lysosomal pro-X carboxypeptidase [Clonorchis sinensis]	146	58.2192	2e-43
FG1_Contig20353	1323	4701	620.201	S28	MER119870	dipeptidyl-peptidase II (Schistosoma japonicum) [S28.002]	379	65.1715	1e-149	emb|CAX71063.1| putative Lysosomal Pro-X carboxypeptidase precursor [Schistosoma japonicum]	379	65.1715	1e-147
FG1_Contig19977	1015	3321	571.091	S01A	MER098910	ovochymase domain 3 (Schistosoma japonicum) [S01.245]	167	67.6647	6e-67	emb|CAX74751.1| Mastin precursor [Schistosoma japonicum]	267	65.5431	1e-109
FG1_Contig24417	336	1012	525.707	S10	MER110985	serine carboxypeptidase A (Oryzias latipes) [S10.002]	55	69.0909	5e-17	dbj|BAG65336.1| unnamed protein product [Homo sapiens]	63	63.4921	3e-16
FG1_Contig20497	349	1010	505.124	S28	MER119870	dipeptidyl-peptidase II (Schistosoma japonicum) [S28.002]	60	58.3333	3e-15	emb|CAX71063.1| putative Lysosomal Pro-X carboxypeptidase precursor [Schistosoma japonicum]	82	54.878	3e-20
FG1_Contig29653	615	1723	489.004	S01A	MER098910	ovochymase domain 3 (Schistosoma japonicum) [S01.245]	136	50	2e-37	ref|XP_002571685.1| subfamily S1A unassigned peptidase (S01 family) [Schistosoma mansoni] emb|CAZ27915.1| subfamily S1A unassigned peptidase (S01 family) [Schistosoma mansoni]	141	52.4823	1e-38
FG1_Contig21201	290	332	199.822	S09X	MER077683	Mername-AA196 putative peptidase (Xenopus tropicalis) [S09.054]	80	47.5	4e-15	emb|CAX69743.1| Abhydrolase domain-containing protein 12 [Schistosoma japonicum]	95	61.0526	6e-25
FG1_Contig21567	519	570	191.695	S54	MER054169	rhomboid-like protein 5 (Gallus gallus) [S54.954]	78	38.4615	5e-09	ref|XP_002110171.1| hypothetical protein TRIADDRAFT_53891 [Trichoplax adhaerens] gb|EDV28337.1| hypothetical protein TRIADDRAFT_53891 [Trichoplax adhaerens]	80	40	1e-08
FG1_Contig14818	941	1022	189.567	S09X	MER017369	Mername-AA196 putative peptidase (Mus musculus) [S09.054]	191	40.3141	6e-34	emb|CAX69743.1| Abhydrolase domain-containing protein 12 [Schistosoma japonicum]	146	50.6849	6e-34
FG1_Contig23017	1880	1724	160.06	S33	MER157821	family S33 unassigned peptidases (Dipodomys ordii) [S33.UPW]	295	43.3898	4e-66	gb|ACO82054.1| lipase [Clonorchis sinensis]	381	61.4173	1e-138
FG1_Contig20233	1167	1001	149.715	S01B	MER182711	DegP peptidase (Dickeya dadantii) [S01.273]	181	24.8619	2e-07	ref|XP_002593626.1| hypothetical protein BRAFLDRAFT_235773 [Branchiostoma floridae] gb|EEN49637.1| hypothetical protein BRAFLDRAFT_235773 [Branchiostoma floridae]	259	47.1042	3e-56
FG1_Contig24083	1406	932	115.7	S01A	MER098912	subfamily S1A unassigned peptidases (Schistosoma japonicum) [S01.UPA]	214	65.8879	2e-82	gb|AAW27404.1| SJCHGC03379 protein [Schistosoma japonicum]	230	64.7826	8e-87
FG1_Contig9783	280	183	114.076	S54	MER054169	rhomboid-like protein 5 (Gallus gallus) [S54.954]	92	25	2e-09	ref|NP_001133781.1| Rhomboid domain-containing protein 1 [Salmo salar] gb|ACI33888.1| Rhomboid domain-containing protein 1 [Salmo salar] gb|ACI68234.1| Rhomboid domain-containing protein 1 [Salmo salar]	92	28.2609	2e-07
FG1_Contig14109	902	477	92.3026	S09X	MER148303	family S9 unassigned peptidases (Ciona intestinalis) [S09.UPW]	107	42.0561	9e-16	gb|ABM69169.1| lysophospholipase [Clonorchis sinensis]	238	62.1849	1e-82
FG1_Contig21554	935	437	81.5778	S26B	MER099442	signalase {animal} 21 kDa component (Schistosoma japonicum) [S26.010]	116	83.6207	2e-55	gb|AAW24651.1| SJCHGC06703 protein [Schistosoma japonicum] emb|CAX70365.1| SEC11-like 3 [Schistosoma japonicum] emb|CAX70368.1| SEC11-like 3 [Schistosoma japonicum]	182	70.8791	2e-72
FG1_Contig23579	1150	526	79.8344	S26A	MER097692	mitochondrial inner membrane peptidase 1 (Ornithorhynchus anatinus) [S26.002]	128	39.8438	3e-21	emb|CAX74549.1| IMP1 inner mitochondrial membrane peptidase-like [Schistosoma japonicum]	145	58.6207	4e-47
FG1_Contig24737	1549	633	71.3271	S33	MER031614	epoxide hydrolase-like putative peptidase (Homo sapiens) [S33.011]	306	31.0458	3e-40	dbj|BAG60516.1| unnamed protein product [Homo sapiens]	306	31.0458	2e-38
FG1_Contig19208	2623	1036	68.9388	S09X	MER149320	family S9 unassigned peptidases (Ciona intestinalis) [S09.UPW]	194	56.1856	3e-62	ref|XP_002575250.1| peptidase [Schistosoma mansoni] emb|CAZ31483.1| Mername-AA194 putative peptidase (S09 family) [Schistosoma mansoni]	356	74.7191	2.33e-156
FG1_Contig31790	2016	778	67.3583	S33	MER077181	NDRG3 protein (Gallus gallus) [S33.987]	343	28.2799	1e-27	gb|AAP06021.1| similar to XM_080170 misexpression suppressor of KSR 2 in Drosophila melanogaster [Schistosoma japonicum]	388	59.2784	1e-129
FG1_Contig18010	1070	391	63.7816	S14	MER192950	peptidase Clp {type 1} (Lepeophtheirus salmonis) [S14.001]	189	61.3757	5e-64	emb|CAX74966.1| ClpP caseinolytic peptidase, ATP-dependent, proteolytic subunit homolog [Schistosoma japonicum]	197	76.6497	6e-81
FG1_Contig28452	2030	662	56.9199	S09X	MER078797	protein similar to {Mus musculus} chromosome 20 open reading frame 135 (Macaca mulatta) [S09.976]	346	38.1503	8e-62	gb|ABX82812.1| HLA-B-associated protein 5 [Sus scrofa]	552	33.8768	2e-77
FG1_Contig15249	1650	531	56.1711	S33	MER044842	protein phosphatase methylesterase 1 (Drosophila melanogaster) [S33.984]	394	41.6244	4e-80	ref|XP_002576490.1| protein phosphatase methylesterase 1 (S33 family) [Schistosoma mansoni] emb|CAZ32727.1| protein phosphatase methylesterase 1 (S33 family) [Schistosoma mansoni]	232	77.1552	1e-96
FG1_Contig19371	2500	762	53.2007	S16	MER111537	PIM1 peptidase (Gasterosteus aculeatus) [S16.002]	286	52.0979	1e-72	ref|XP_002572282.1| PIM1 peptidase (S16 family) [Schistosoma mansoni] emb|CAZ28513.1| PIM1 peptidase (S16 family) [Schistosoma mansoni]	765	77.1242	0
FG1_Contig31637	1025	249	42.4012	S01A	MER013674	subfamily S1A unassigned peptidases (Schistosoma mansoni) [S01.UPA]	189	41.2698	5e-35	ref|XP_002580446.1| aminopeptidase PILS (M01 family) [Schistosoma mansoni] emb|CAZ36685.1| aminopeptidase PILS (M01 family) [Schistosoma mansoni]	299	51.8395	1e-79
FG1_Contig24985	658	159	42.1768	S09X	MER056584	family S9 unassigned peptidases (Strongylocentrotus purpuratus) [S09.UPW]	136	55.8824	1e-39	ref|XP_002574140.1| family S9 unassigned peptidase (S09 family) [Schistosoma mansoni] emb|CAZ30373.1| family S9 unassigned peptidase (S09 family) [Schistosoma mansoni]	201	79.1045	6e-88
FG1_Contig29618	2117	478	39.4103	S09X	MER043281	hormone-sensitive lipase (Drosophila melanogaster) [S09.993]	155	51.6129	9e-42	ref|XP_001974881.1| GG22019 [Drosophila erecta] gb|EDV55281.1| GG22019 [Drosophila erecta]	155	52.2581	6e-40
FG1_Contig22294	552	122	38.5765	S54	MER113496	family S54 unassigned peptidases (Schistosoma japonicum) [S54.UPW]	129	57.3643	1e-35	gb|AAX27187.2| SJCHGC04450 protein [Schistosoma japonicum]	139	56.1151	4e-36
FG1_Contig18953	1281	278	37.879	S09A	MER113308	prolyl oligopeptidase (Schistosoma japonicum) [S09.001]	262	67.5573	1e-101	gb|AAX26405.2| SJCHGC02324 protein [Schistosoma japonicum]	416	63.7019	1e-152
FG1_Contig23238	979	199	35.4791	S01B	MER147591	subfamily S1B unassigned peptidases (Ciona savignyi) [S01.UPB]	292	39.726	3e-49	ref|XP_002578558.1| subfamily S1B unassigned peptidase (S01 family) [Schistosoma mansoni] emb|CAZ34796.1| subfamily S1B unassigned peptidase (S01 family) [Schistosoma mansoni]	239	72.8033	6e-92
FG1_Contig19087	1447	282	34.016	S09X	MER034652	family S9 unassigned peptidases (Salmonella typhimurium) [S09.UPW]	136	36.0294	3e-12	ref|XP_001352826.1| GA21977 [Drosophila pseudoobscura pseudoobscura] gb|EAL30327.1| GA21977 [Drosophila pseudoobscura pseudoobscura]	165	34.5455	5e-13
FG1_Contig22418	600	109	31.7086	S08A	MER048784	subfamily S8A unassigned peptidases (Colwellia psychrerythraea) [S08.UPA]	105	37.1429	3e-07	ref|XP_002579895.1| protease [Schistosoma mansoni] emb|CAZ36134.1| protease, putative [Schistosoma mansoni]	168	50	2e-38
FG1_Contig11331	321	54	29.3624	S54	MER113340	family S54 unassigned peptidases (Caenorhabditis briggsae) [S54.UPW]	103	29.1262	3e-06	ref|XP_002572338.1| RHBDF1 protein (S54 family) [Schistosoma mansoni] emb|CAZ28569.1| RHBDF1 protein (S54 family) [Schistosoma mansoni]	121	37.1901	2e-11
FG1_Contig25180	400	66	28.7996	S08A	MER085902	subfamily S8A unassigned peptidases (Herpetosiphon aurantiacus) [S08.UPA]	69	42.029	5e-07	gb|AAX24322.2| SJCHGC08278 protein [Schistosoma japonicum]	97	49.4845	9e-20
FG1_Contig13164	383	62	28.255	S08A	MER191778	subfamily S8A unassigned peptidases (Schistosoma mansoni) [S08.UPA]	96	70.8333	2e-37	ref|XP_002575382.1| subfamily S8B unassigned peptidase (S08 family) [Schistosoma mansoni] emb|CAZ31615.1| subfamily S8B unassigned peptidase (S08 family) [Schistosoma mansoni]	126	69.0476	3e-48
FG1_Contig19031	1358	206	26.4771	S08A	MER191780	site-1 peptidase (Schistosoma mansoni) [S08.063]	361	60.6648	1e-112	ref|XP_002577240.1| site-1 peptidase (S08 family) [Schistosoma mansoni] emb|CAZ33477.1| site-1 peptidase (S08 family) [Schistosoma mansoni]	452	62.1681	1e-152
FG1_Contig12009	350	51	25.4334	S33	MER141658	family S33 unassigned peptidases (Branchiostoma floridae) [S33.UPW]	111	50.4505	3e-24	ref|XP_002032811.1| GM20984 [Drosophila sechellia] gb|EDW46824.1| GM20984 [Drosophila sechellia]	110	51.8182	1e-21
FG1_Contig8601	282	41	25.3768	S54	MER036116	rhomboid-like protein 2 (Brachydanio rerio) [S54.002]	63	49.2063	4e-10	ref|XP_002573461.1| family S54 unassigned peptidase (S54 family) [Schistosoma mansoni] emb|CAZ29693.1| family S54 unassigned peptidase (S54 family) [Schistosoma mansoni]	90	71.1111	3e-33
FG1_Contig16063	563	80	24.8018	S54	MER077171	Rhomboid-7 peptidase (Brachydanio rerio) [S54.009]	122	37.7049	6e-17	ref|XP_002574682.1| Rhomboid-7 peptidase (S54 family) [Schistosoma mansoni] emb|CAZ30915.1| Rhomboid-7 peptidase (S54 family) [Schistosoma mansoni]	124	58.871	2e-40
FG1_Contig10991	312	40	22.3773	S09X	MER077184	acetylcholinesterase (Takifugu rubripes) [S09.979]	102	46.0784	9e-19	ref|XP_002574124.1| family S9 non-peptidase homologue (S09 family) [Schistosoma mansoni] emb|CAZ30357.1| family S9 non-peptidase homologue (S09 family) [Schistosoma mansoni]	103	53.3981	3e-22
FG1_Contig12528	359	46	22.3648	S12	MER118189	family S12 unassigned peptidases (Schistosoma japonicum) [S12.UPW]	97	63.9175	1e-32	gb|AAX27853.2| SJCHGC01499 protein [Schistosoma japonicum]	97	63.9175	9e-31
FG1_Contig14727	457	49	18.7147	S59	MER112580	nucleoporin 145 (Gallus gallus) [S59.001]	106	57.5472	4e-30	ref|XP_001649036.1| nuclear pore complex protein nup98 [Aedes aegypti] gb|EAT44225.1| nuclear pore complex protein nup98 [Aedes aegypti]	94	57.4468	2e-28
FG1_Contig6530	227	24	18.4539	S33	MER149511	family S33 unassigned peptidases (Ciona intestinalis) [S33.UPW]	75	48	5e-17	ref|XP_002004548.1| GI19993 [Drosophila mojavensis] gb|EDW08483.1| GI19993 [Drosophila mojavensis]	73	54.7945	2e-13
FG1_Contig14923	513	54	18.3729	S08A	MER090852	subfamily S8A unassigned peptidases (Geobacter lovleyi) [S08.UPA]	116	33.6207	5e-07	ref|XP_002578324.1| zinc finger protein [Schistosoma mansoni] emb|CAZ34562.1| zinc finger protein, putative [Schistosoma mansoni]	117	51.2821	6e-25
FG1_Contig31645	272	28	17.9677	S12	MER011718	family S12 unassigned peptidases (Caenorhabditis elegans) [S12.UPW]	91	35.1648	6e-11	gb|AAW26918.1| SJCHGC01465 protein [Schistosoma japonicum]	90	51.1111	1e-20
FG1_Contig21091	647	63	16.9957	S08A	MER191777	tripeptidyl-peptidase II (Schistosoma mansoni) [S08.090]	153	55.5556	9e-48	ref|XP_002573128.1| tripeptidyl-peptidase II (S08 family) [Schistosoma mansoni] emb|CAZ29360.1| tripeptidyl-peptidase II (S08 family) [Schistosoma mansoni]	153	55.5556	5e-46
FG1_Contig15992	543	52	16.715	S09B	MER192242	subfamily S9B unassigned peptidases (Schistosoma mansoni) [S09.UPB]	180	62.2222	4e-66	ref|XP_002577040.1| subfamily S9B unassigned peptidase (S09 family) [Schistosoma mansoni] emb|CAZ33277.1| subfamily S9B unassigned peptidase (S09 family) [Schistosoma mansoni]	180	62.2222	2e-64
FG1_Contig7879	241	23	16.6576	S08B	MER139853	subfamily S8B unassigned peptidases (Nematostella vectensis) [S08.UPB]	79	73.4177	3e-33	emb|CAX73112.1| proprotein convertase subtilisin/kexin type 2 [Schistosoma japonicum]	87	78.1609	9e-33
FG1_Contig32638	634	60	16.5183	S12	MER192854	LACT-1 peptidase (Trichoplax adhaerens) [S12.004]	196	35.2041	2e-24	ref|XP_002575149.1| family S12 unassigned peptidase (S12 family) [Schistosoma mansoni] emb|CAZ31382.1| family S12 unassigned peptidase (S12 family) [Schistosoma mansoni]	208	54.8077	4e-56
FG1_Contig25845	395	37	16.3496	S09X	MER037861	BC026374 protein {{Mus musculus}} (Mus musculus) [S09.962]	43	60.4651	3e-09	ref|XP_002574124.1| family S9 non-peptidase homologue (S09 family) [Schistosoma mansoni] emb|CAZ30357.1| family S9 non-peptidase homologue (S09 family) [Schistosoma mansoni]	83	55.4217	5e-20
FG1_Contig15571	511	47	16.0539	S08A	MER191778	subfamily S8A unassigned peptidases (Schistosoma mansoni) [S08.UPA]	112	76.7857	9e-46	ref|XP_002575382.1| subfamily S8B unassigned peptidase (S08 family) [Schistosoma mansoni] emb|CAZ31615.1| subfamily S8B unassigned peptidase (S08 family) [Schistosoma mansoni]	163	70.5521	2e-60
FG1_Contig17073	661	59	15.5795	S54	MER165008	RHBDF1 protein (Salmo salar) [S54.952]	183	45.3552	7e-46	ref|XP_002572338.1| RHBDF1 protein (S54 family) [Schistosoma mansoni] emb|CAZ28569.1| RHBDF1 protein (S54 family) [Schistosoma mansoni]	172	49.4186	9e-47
FG1_Contig7481	234	20	14.9182	S08A	MER191778	subfamily S8A unassigned peptidases (Schistosoma mansoni) [S08.UPA]	77	62.3377	2e-22	ref|XP_002575382.1| subfamily S8B unassigned peptidase (S08 family) [Schistosoma mansoni] emb|CAZ31615.1| subfamily S8B unassigned peptidase (S08 family) [Schistosoma mansoni]	77	62.3377	1e-20
FG1_Contig33183	502	42	14.6032	S09X	MER044522	acetylcholinesterase (Bemisia tabaci) [S09.979]	64	43.75	5e-07	ref|XP_002574124.1| family S9 non-peptidase homologue (S09 family) [Schistosoma mansoni] emb|CAZ30357.1| family S9 non-peptidase homologue (S09 family) [Schistosoma mansoni]	112	31.25	5e-12
FG1_Contig13216	385	26	11.7873	S09B	MER125676	subfamily S9B unassigned peptidases (Schistosoma japonicum) [S09.UPB]	116	60.3448	4e-39	gb|AAW25710.1| SJCHGC07346 protein [Schistosoma japonicum]	116	60.3448	3e-37
FG1_Contig7153	229	15	11.4329	S09A	MER015621	At1g76140 {{Arabidopsis thaliana}}-type peptidase (Arabidopsis thaliana) [S09.A02]	74	45.9459	4e-14	ref|XP_001505853.1| PREDICTED: similar to Prolyl endopeptidase (Post-proline cleaving enzyme) (PE) [Ornithorhynchus anatinus]	75	50.6667	3e-13
FG1_Contig8494	252	16	11.0821	S08A	MER191779	subfamily S8A unassigned peptidases (Schistosoma mansoni) [S08.UPA]	83	36.1446	3e-11	ref|XP_001809621.1| PREDICTED: similar to prohormone convertase 1 [Tribolium castaneum]	83	38.5542	3e-08
FG1_Contig23877	427	26	10.6279	S09X	MER017239	family S9 unassigned peptidases (Drosophila melanogaster) [S09.UPW]	141	41.844	1e-26	ref|NP_001032774.1| abhydrolase domain containing 13 [Danio rerio] sp|Q32LS6.1|ABHDD_DANRE RecName: Full=Abhydrolase domain-containing protein 13 gb|AAI09446.1| Zgc:123286 [Danio rerio]	120	50.8333	3e-27
FG1_Contig12105	345	21	10.6244	S09X	MER077835	neuroligin 3 (Brachydanio rerio) [S09.987]	113	34.5133	1e-10	ref|XP_002574956.1| family S9 non-peptidase homologue (S09 family) [Schistosoma mansoni] emb|CAZ31189.1| family S9 non-peptidase homologue (S09 family) [Schistosoma mansoni]	114	60.5263	2e-37
FG1_499526	255	15	10.2672	S01A	MER111572	matriptase-3 (Gasterosteus aculeatus) [S01.072]	52	50	1e-08	dbj|BAG58675.1| unnamed protein product [Homo sapiens]	78	50	4e-16
Threonine protease
FG1_Contig16088	1064	1075	176.347	T01A	MER167436	proteasome catalytic subunit 3 (Schistosoma japonicum) [T01.012]	198	81.8182	4e-93	emb|CAX70714.1| proteasome (prosome, macropain) subunit, beta type 5 [Schistosoma japonicum]	267	69.6629	1e-104
FG1_Contig17084	663	656	172.7	T01A	MER165974	subfamily T1A unassigned peptidases (Clonorchis sinensis) [T01.UPA]	193	78.7565	1e-84	gb|AAX47290.1| proteasome beta 1 subunit [Clonorchis sinensis]	204	77.9412	1e-87
FG1_Contig20262	860	693	140.649	T01A	MER171163	proteasome subunit alpha 2 (Haliotis discus) [T01.972]	196	67.8571	4e-71	ref|XP_002578004.1| proteasome subunit alpha 2 (T01 family) [Schistosoma mansoni] emb|CAZ34242.1| proteasome subunit alpha 2 (T01 family) [Schistosoma mansoni]	234	82.4786	1e-104
FG1_Contig16794	626	410	114.317	T01A	MER111812	proteasome subunit alpha 4 (Gasterosteus aculeatus) [T01.973]	175	56	8e-54	emb|CAX75030.1| proteasome (prosome macropain) subunit alpha type 4 [Schistosoma japonicum]	185	76.2162	2e-76
FG1_Contig18792	1161	730	109.747	T02	MER119795	glycosylasparaginase precursor (Schistosoma japonicum) [T02.001]	196	61.7347	1e-65	ref|XP_002580314.1| family T2 unassigned peptidase (T02 family) [Schistosoma mansoni] emb|CAZ36553.1| family T2 unassigned peptidase (T02 family) [Schistosoma mansoni]	344	52.3256	1e-100
FG1_Contig23376	1002	527	91.8005	T01A	MER123468	proteasome catalytic subunit 2 (Schistosoma japonicum) [T01.011]	202	75.2475	6e-88	ref|XP_002578515.1| proteasome catalytic subunit 2 (T01 family) [Schistosoma mansoni] emb|CAZ34753.1| proteasome catalytic subunit 2 (T01 family) [Schistosoma mansoni]	280	71.4286	1e-114
FG1_Contig17233	782	381	85.0395	T01A	MER035524	proteasome catalytic subunit 1 (Schistosoma japonicum) [T01.010]	197	71.066	3e-78	ref|XP_002574904.1| proteasome catalytic subunit 1 (T01 family) [Schistosoma mansoni] emb|CAZ31137.1| proteasome catalytic subunit 1 (T01 family) [Schistosoma mansoni]	201	73.1343	4e-80
FG1_Contig22870	634	254	69.9273	T01A	MER085407	proteasome subunit alpha 6 (Aedes aegypti) [T01.971]	187	55.0802	8e-59	gb|AAW25684.1| SJCHGC05022 protein [Schistosoma japonicum] emb|CAX70048.1| proteasome (prosome, macropain) subunit, alpha type 6 [Schistosoma japonicum] emb|CAX74383.1| proteasome (prosome, macropain) subunit, alpha type 6 [Schistosoma japonicum]	191	76.9634	2e-81
FG1_Contig28567	869	283	56.8419	T01A	MER000559	proteasome subunit beta 4 (Xenopus laevis) [T01.987]	207	54.1063	7e-60	ref|XP_002576942.1| proteasome subunit beta 4 (T01 family) [Schistosoma mansoni] emb|CAZ33179.1| proteasome subunit beta 4 (T01 family) [Schistosoma mansoni]	230	63.913	3e-88
FG1_Contig17360	708	203	50.0455	T01A	MER035526	proteasome subunit beta 2 (Schistosoma japonicum) [T01.984]	188	69.1489	2e-74	gb|AAX47291.1| proteasome beta 2 subunit [Clonorchis sinensis]	200	76.5	2e-86
FG1_Contig28304	353	49	24.2283	T03	MER181278	gamma-glutamyltransferase {insect} (Drosophila ananassae) [T03.007]	123	32.5203	4e-07	ref|XP_002579947.1| gamma-glutamyltransferase-like protein 3 (T03 family) [Schistosoma mansoni] emb|CAZ36186.1| gamma-glutamyltransferase-like protein 3 (T03 family) [Schistosoma mansoni]	96	54.1667	2e-22
FG1_Contig12937	374	46	21.4678	T02	MER119795	glycosylasparaginase precursor (Schistosoma japonicum) [T02.001]	121	55.3719	1e-31	ref|XP_002580314.1| family T2 unassigned peptidase (T02 family) [Schistosoma mansoni] emb|CAZ36553.1| family T2 unassigned peptidase (T02 family) [Schistosoma mansoni]	126	57.1429	1e-32
FG1_Contig20598	337	26	13.4662	T02	MER181375	taspase-1 (Ixodes scapularis) [T02.004]	79	55.6962	4e-19	gb|AAW25758.1| SJCHGC02349 protein [Schistosoma japonicum]	75	61.3333	4e-19
Protease inhibitor
FG1_Contig21378	387	990	446.505	I25A	MER116858	subfamily I25A unassigned peptidase inhibitors (Clonorchis sinensis) [I25.UPA]	75	52	5e-20	gb|ACS35603.1| Stefin-1 [Fasciola gigantica]	76	100	3e-37
FG1_Contig11926	1011	2003	345.806	I25A	MER045024	subfamily I25A unassigned peptidase inhibitor homologues (Fasciola hepatica) [I25.UNA]	107	98.1308	4e-57	emb|CAC86126.1| putative cys1 protein [Fasciola hepatica]	336	98.5119	0
FG1_Contig7349	232	276	207.646	I04	MER135501	PwSERPIN {{Paragonimus westermani}} (Paragonimus westermani) [I04.067]	72	44.4444	1e-10	gb|AAI56711.1| Predicted gene, OTTMUSG00000000720 [synthetic construct]	61	45.9016	3e-07
FG1_Contig21830	642	521	141.646	I25B	MER018604	T-kininogen inhibitor unit 3 (Rattus norvegicus) [I25.019]	103	29.1262	2e-07	gb|EDK97648.1| mCG128256, isoform CRA_c [Mus musculus]	93	32.2581	7e-08
FG1_Contig24726	764	600	137.076	I04	MER179771	serpin Emu {{Echinococcus multilocularis}} (Schistosoma japonicum) [I04.080]	233	37.7682	3e-45	ref|XP_002577485.1| serine protease inhibitors serpins [Schistosoma mansoni] emb|CAZ33723.1| serine protease inhibitors, serpins, putative [Schistosoma mansoni]	237	39.6624	1e-44
FG1_Contig11249	1512	851	98.2381	I04	MER167667	family I4 unassigned peptidase inhibitors (Ixodes scapularis) [I04.UPW]	332	34.9398	4e-48	emb|CAX69453.1| Serpin B6 (Placental thrombin inhibitor) [Schistosoma japonicum]	356	33.7079	3e-51
FG1_Contig20464	1723	937	94.9198	I32	MER167048	family I32 unassigned peptidase inhibitors (Schistosoma japonicum) [I32.UPW]	109	57.7982	4e-28	emb|CAX71675.1| Proteinase inhibitor I32, inhibitor of apoptosis,domain-containing protein [Schistosoma japonicum]	390	53.8462	1e-109
FG1_Contig19249	6226	3135	87.8882	I39	MER168414	family I39 unassigned peptidase inhibitors (Nasonia vitripennis) [I39.UPW]	862	29.0023	3e-82	ref|XP_002579987.1| macroglobulin/complement [Schistosoma mansoni] emb|CAZ36226.1| macroglobulin/complement, putative [Schistosoma mansoni]	1119	37.7122	0
FG1_Contig22772	2130	1061	86.9437	I43	MER199682	family I43 unassigned peptidase inhibitors (Gallus gallus) [I43.UPW]	206	30.5825	3e-23	ref|XP_002581276.1| titin [Schistosoma mansoni] emb|CAZ37515.1| titin, putative [Schistosoma mansoni]	656	68.9024	0
FG1_Contig22373	1312	623	82.8813	I04	MER018680	family I4 unassigned peptidase inhibitors (Schistosoma japonicum) [I04.UPW]	398	35.9296	4e-74	emb|CAX76359.1| Estrogen-regulated protein EP45 precursor [Schistosoma japonicum]	404	36.1386	5e-74
FG1_Contig16522	594	266	78.1623	I63	MER148269	family I63 unassigned peptidase inhibitor homologues (Ciona intestinalis) [I63.UNW]	85	37.6471	1e-07	ref|XP_002591404.1| hypothetical protein BRAFLDRAFT_69967 [Branchiostoma floridae] gb|EEN47415.1| hypothetical protein BRAFLDRAFT_69967 [Branchiostoma floridae]	87	39.0805	1e-06
FG1_Contig12320	1439	629	76.2943	I63	MER156896	family I63 unassigned peptidase inhibitors (Dipodomys ordii) [I63.UPW]	95	32.6316	8e-07	ref|XP_001950069.1| PREDICTED: similar to AGAP003873-PA [Acyrthosiphon pisum]	121	35.5372	2e-12
FG1_Contig17859	1103	420	66.4624	I04	MER018680	family I4 unassigned peptidase inhibitors (Schistosoma japonicum) [I04.UPW]	238	42.437	3e-55	emb|CAX76359.1| Estrogen-regulated protein EP45 precursor [Schistosoma japonicum]	238	42.8571	1e-53
FG1_Contig20210	1027	352	59.8239	I43	MER149016	family I43 unassigned peptidase inhibitor homologues (Ciona intestinalis) [I43.UNW]	178	28.0899	2e-12	ref|XP_002577717.1| hemicentin [Schistosoma mansoni] emb|CAZ33955.1| hemicentin, putative [Schistosoma mansoni]	303	37.9538	7e-47
FG1_Contig20433	1056	360	59.5033	I63	MER148108	family I63 unassigned peptidase inhibitor homologues (Ciona intestinalis) [I63.UNW]	153	32.6797	2e-12	ref|XP_002579990.1| integrin beta subunit [Schistosoma mansoni] emb|CAZ36229.1| integrin beta subunit, putative [Schistosoma mansoni]	357	64.4258	1e-137
FG1_Contig18913	1263	422	58.3192	I02	MER142208	family I2 unassigned peptidase inhibitors (Pseudonaja textilis) [I02.UPW]	58	50	3e-07	ref|XP_001360711.1| fat-spondin [Drosophila pseudoobscura pseudoobscura] gb|EAL25286.1| fat-spondin [Drosophila pseudoobscura pseudoobscura]	183	31.1475	2e-20
FG1_Contig26377	1461	463	55.3137	I63	MER156507	family I63 unassigned peptidase inhibitors (Dipodomys ordii) [I63.UPW]	96	44.7917	7e-20	ref|XP_002577722.1| cysteine-rich with egf-like domains protein [Schistosoma mansoni] emb|CAZ33960.1| cysteine-rich with egf-like domains protein [Schistosoma mansoni]	380	44.4737	2e-99
FG1_Contig18156	892	281	54.9849	I02	MER186969	family I2 unassigned peptidase inhibitors (Strongylocentrotus purpuratus) [I02.UPW]	51	45.098	6e-07	ref|XP_002576524.1| serine-type protease inhibitor [Schistosoma mansoni] emb|CAZ32761.1| serine-type protease inhibitor, putative [Schistosoma mansoni]	75	40	2e-06
FG1_Contig22975	2325	716	53.7517	I63	MER148276	family I63 unassigned peptidase inhibitor homologues (Ciona intestinalis) [I63.UNW]	117	35.0427	3e-08	ref|XP_002577369.1| egf-like domain protein [Schistosoma mansoni] emb|CAZ33607.1| egf-like domain protein [Schistosoma mansoni]	584	56.3356	0
FG1_Contig26461	417	125	52.321	I02	MER097853	family I2 unassigned peptidase inhibitors (Ornithorhynchus anatinus) [I02.UPW]	52	55.7692	6e-13	gb|ACO36150.1| Kunitz-like protease inhibitor [Perca flavescens]	54	51.8519	1e-09
FG1_Contig17689	766	220	50.1298	I29	MER043102	cytotoxic T-lymphocyte antigen-2 alpha (Schistosoma japonicum) [I29.002]	59	38.9831	2e-07	emb|CAX70513.1| Cathepsin L-like proteinase precursor [Schistosoma japonicum]	64	40.625	7e-07
FG1_Contig16350	882	252	49.8694	I63	MER182924	family I63 unassigned peptidase inhibitors (Ochotona princeps) [I63.UPW]	190	28.9474	1e-15	ref|XP_002577369.1| egf-like domain protein [Schistosoma mansoni] emb|CAZ33607.1| egf-like domain protein [Schistosoma mansoni]	277	59.5668	1e-107
FG1_Contig38896	351	99	49.2301	I02	MER021736	family I2 unassigned peptidase inhibitors (Fasciola hepatica) [I02.UPW]	51	56.8627	2e-12	gb|AAB46830.1| Fh-KTM=6.751 kda monomeric Kunitz-type proteinase inhibitor [Fasciola hepatica=trematode, Peptide, 58 aa]	54	55.5556	4e-11
FG1_Contig18033	896	228	44.4149	I43	MER201921	family I43 unassigned peptidase inhibitors (Drosophila melanogaster) [I43.UPW]	207	33.8164	1e-25	ref|XP_002571772.1| hypothetical protein [Schistosoma mansoni] emb|CAZ28002.1| kettin/titin-related protein [Schistosoma mansoni]	263	72.2433	1e-112
FG1_Contig27033	1172	276	41.104	I01	MER183656	family I1 unassigned peptidase inhibitors (Ochotona princeps) [I01.UPW]	133	36.8421	9e-14	ref|XP_002578119.1| neurexin IV; septate junction protein [Schistosoma mansoni] emb|CAZ34357.1| neurexin IV; septate junction protein [Schistosoma mansoni]	315	80.6349	1e-152
FG1_Contig19400	3251	748	40.1594	I63	MER156696	family I63 unassigned peptidase inhibitors (Dipodomys ordii) [I63.UPW]	157	43.949	1e-39	ref|XP_002578904.1| laminin gamma-1 chain [Schistosoma mansoni] emb|CAZ35142.1| laminin gamma-1 chain,, putative [Schistosoma mansoni]	586	57.6792	0
FG1_Contig17801	789	179	39.5985	I43	MER145769	family I43 unassigned peptidase inhibitor homologues (Ciona savignyi) [I43.UNW]	163	26.9939	3e-13	ref|XP_002580875.1| hypothetical protein [Schistosoma mansoni] emb|CAZ37114.1| expressed protein [Schistosoma mansoni]	122	72.9508	7e-50
FG1_Contig22368	1306	292	39.0249	I63	MER148603	family I63 unassigned peptidase inhibitor homologues (Ciona intestinalis) [I63.UNW]	103	33.9806	2e-11	ref|XP_002572593.1| hypothetical protein [Schistosoma mansoni] emb|CAZ28825.1| expressed protein [Schistosoma mansoni]	197	45.6853	2e-45
FG1_Contig12324	352	78	38.6771	I04	MER018680	family I4 unassigned peptidase inhibitors (Schistosoma japonicum) [I04.UPW]	118	36.4407	3e-18	emb|CAX76360.1| Serine protease inhibitor serpin [Schistosoma japonicum]	118	36.4407	2e-16
FG1_Contig15892	537	118	38.3539	I32	MER122755	survivin (Schistosoma japonicum) [I32.005]	103	60.1942	3e-33	gb|ABJ98055.1| survivin [Cricetulus griseus]	98	52.0408	2e-23
FG1_Contig20428	950	208	38.2157	I43	MER183435	family I43 unassigned peptidase inhibitors (Ochotona princeps) [I43.UPW]	125	36	2e-13	ref|XP_002575948.1| hypothetical protein [Schistosoma mansoni] emb|CAZ32183.1| expressed protein [Schistosoma mansoni]	311	53.0547	3e-93
FG1_Contig25465	1749	382	38.122	I63	MER177030	family I63 unassigned peptidase inhibitors (Tetrahymena thermophila) [I63.UPW]	91	36.2637	2e-06	gb|AAA29866.1| epidermal growth factor receptor [Schistosoma mansoni]	540	52.037	1e-175
FG1_Contig29941	1260	272	37.6791	I43	MER201698	family I43 unassigned peptidase inhibitors (Rattus norvegicus) [I43.UPW]	161	33.5404	1e-14	ref|XP_002581753.1| titin [Schistosoma mansoni] emb|CAZ37994.1| titin, putative [Schistosoma mansoni]	21	61.9048	3e-70
FG1_Contig21648	1605	331	35.9961	I43	MER149010	family I43 unassigned peptidase inhibitor homologues (Ciona intestinalis) [I43.UNW]	193	29.0155	2e-15	ref|XP_002572237.1| protein kinase; titin [Schistosoma mansoni] emb|CAZ28468.1| protein kinase; titin, putative [Schistosoma mansoni]	189	46.0317	9e-42
FG1_Contig34638	401	80	34.8215	I43	MER201254	family I43 unassigned peptidase inhibitors (Manduca sexta) [I43.UPW]	129	37.2093	5e-20	ref|XP_002580854.1| neuroglian; septate junction protein [Schistosoma mansoni] emb|CAZ37093.1| neuroglian; septate junction protein [Schistosoma mansoni]	133	76.6917	6e-56
FG1_Contig17423	881	175	34.6708	I63	MER156695	family I63 unassigned peptidase inhibitors (Dipodomys ordii) [I63.UPW]	96	48.9583	7e-24	ref|XP_002578904.1| laminin gamma-1 chain [Schistosoma mansoni] emb|CAZ35142.1| laminin gamma-1 chain,, putative [Schistosoma mansoni]	292	78.7671	1e-149
FG1_Contig17521	732	145	34.5748	I02	MER177116	family I2 unassigned peptidase inhibitors (Pediculus humanus) [I02.UPW]	60	43.3333	1e-08	ref|XP_002581275.1| serine-type protease inhibitor [Schistosoma mansoni] emb|CAZ37514.1| serine-type protease inhibitor, putative [Schistosoma mansoni]	222	52.2523	2e-59
FG1_Contig26741	954	188	34.3963	I63	MER157477	family I63 unassigned peptidase inhibitors (Dipodomys ordii) [I63.UPW]	101	36.6337	3e-10	ref|XP_544242.2| PREDICTED: similar to mannose receptor, C type 1-like 1 [Canis familiaris]	112	37.5	2e-10
FG1_Contig23771	627	123	34.2405	I51	MER110003	family I51 unassigned peptidase inhibitor homologues (Gallus gallus) [I51.UNW]	131	29.0076	4e-08	ref|XP_002576374.1| phosphatidylethanolamine-binding protein [Schistosoma mansoni] emb|CAZ32611.1| phosphatidylethanolamine-binding protein, putative [Schistosoma mansoni]	202	43.0693	5e-41
FG1_Contig24767	442	85	33.566	I43	MER157307	family I43 unassigned peptidase inhibitors (Dipodomys ordii) [I43.UPW]	130	26.9231	2e-07	ref|XP_002571746.1| peroxidasin [Schistosoma mansoni] emb|CAZ27976.1| peroxidasin, putative [Schistosoma mansoni]	135	65.1852	3e-46
FG1_Contig22526	668	128	33.4454	I43	MER156724	family I43 unassigned peptidase inhibitors (Dipodomys ordii) [I43.UPW]	136	33.8235	1e-10	emb|CAG04726.1| unnamed protein product [Tetraodon nigroviridis]	93	36.5591	9e-09
FG1_Contig17655	903	170	32.8597	I63	MER146385	family I63 unassigned peptidase inhibitor homologues (Ciona savignyi) [I63.UNW]	66	37.8788	5e-06	ref|XP_002572968.1| cell polarity protein [Schistosoma mansoni] emb|CAZ29200.1| Crumbs complex protein; cell polarity protein; family S9 non-peptidase homologue (S09 family) [Schistosoma mansoni]	289	64.7059	1e-111
FG1_Contig19058	1391	259	32.4994	I01	MER182946	family I1 unassigned peptidase inhibitors (Ochotona princeps) [I01.UPW]	135	31.1111	2e-16	ref|XP_002578118.1| neurexin IV; septate junction protein [Schistosoma mansoni] emb|CAZ34356.1| neurexin IV; septate junction protein [Schistosoma mansoni]	250	73.6	1e-110
FG1_Contig18574	1028	190	32.2599	I63	MER183017	family I63 unassigned peptidase inhibitors (Ochotona princeps) [I63.UPW]	71	49.2958	2e-11	ref|XP_002571586.1| hypothetical protein [Schistosoma mansoni] emb|CAZ27816.1| hypothetical conserved protein [Schistosoma mansoni]	266	49.6241	1e-81
FG1_Contig19106	1442	256	30.9868	I01	MER148782	family I1 unassigned peptidase inhibitor homologues (Ciona intestinalis) [I01.UNW]	114	29.8246	8e-07	ref|XP_002572968.1| cell polarity protein [Schistosoma mansoni] emb|CAZ29200.1| Crumbs complex protein; cell polarity protein; family S9 non-peptidase homologue (S09 family) [Schistosoma mansoni]	464	63.5776	1e-172
FG1_Contig18271	924	164	30.9795	I43	MER201696	family I43 unassigned peptidase inhibitors (Rattus norvegicus) [I43.UPW]	160	31.875	8e-18	ref|XP_002572237.1| protein kinase; titin [Schistosoma mansoni] emb|CAZ28468.1| protein kinase; titin, putative [Schistosoma mansoni]	309	73.7864	1e-134
FG1_Contig17530	742	130	30.5803	I51	MER113683	family I51 unassigned peptidase inhibitor homologues (Aedes aegypti) [I51.UNW]	77	50.6494	3e-14	ref|XP_002576374.1| phosphatidylethanolamine-binding protein [Schistosoma mansoni] emb|CAZ32611.1| phosphatidylethanolamine-binding protein, putative [Schistosoma mansoni]	221	63.8009	4e-84
FG1_Contig12909	373	64	29.9484	I63	MER148078	family I63 unassigned peptidase inhibitor homologues (Ciona intestinalis) [I63.UNW]	93	37.6344	3e-16	ref|XP_002572968.1| cell polarity protein [Schistosoma mansoni] emb|CAZ29200.1| Crumbs complex protein; cell polarity protein; family S9 non-peptidase homologue (S09 family) [Schistosoma mansoni]	124	62.9032	4e-50
FG1_Contig18604	1039	171	28.7265	I43	MER201255	family I43 unassigned peptidase inhibitors (Manduca sexta) [I43.UPW]	190	34.2105	8e-24	ref|XP_002576148.1| neuroglian; septate junction protein [Schistosoma mansoni] emb|CAZ32383.1| neuroglian; septate junction protein [Schistosoma mansoni]	291	59.4502	7e-95
FG1_Contig31570	2124	343	28.1865	I02	MER119966	family I2 unassigned peptidase inhibitors (Culex pipiens) [I02.UPW]	62	50	1e-12	ref|XP_002581275.1| serine-type protease inhibitor [Schistosoma mansoni] emb|CAZ37514.1| serine-type protease inhibitor, putative [Schistosoma mansoni]	701	46.2197	0
FG1_Contig17946	828	133	28.0365	I63	MER201294	family I63 unassigned peptidase inhibitors (Brachydanio rerio) [I63.UPW]	247	23.4818	1e-07	ref|XP_002579792.1| subfamily M23B non-peptidase homologue (M23 family) [Schistosoma mansoni] emb|CAZ36031.1| subfamily M23B non-peptidase homologue (M23 family) [Schistosoma mansoni]	281	38.0783	5e-47
FG1_Contig18491	999	159	27.7801	I43	MER200273	family I43 unassigned peptidase inhibitors (Mus musculus) [I43.UPW]	122	31.9672	5e-11	ref|XP_002572691.1| titin [Schistosoma mansoni] emb|CAZ28923.1| titin, putative [Schistosoma mansoni]	357	27.1709	1e-31
FG1_Contig18795	1162	176	26.4368	I43	MER200198	family I43 unassigned peptidase inhibitors (Mus musculus) [I43.UPW]	164	37.8049	4e-25	ref|XP_002572237.1| protein kinase; titin [Schistosoma mansoni] emb|CAZ28468.1| protein kinase; titin, putative [Schistosoma mansoni]	386	79.7927	0
FG1_Contig18819	1185	179	26.3656	I43	MER199832	family I43 unassigned peptidase inhibitors (Callithrix jacchus) [I43.UPW]	209	27.2727	2e-13	ref|XP_002570063.1| neurotracting/lsamp/neurotrimin/obcam related cell adhesion molecule [Schistosoma mansoni] emb|CAY17707.1| neurotracting/lsamp/neurotrimin/obcam related cell adhesion molecule [Schistosoma mansoni]	364	87.0879	0
FG1_Contig17151	675	101	26.1168	I43	MER149193	family I43 unassigned peptidase inhibitor homologues (Ciona intestinalis) [I43.UNW]	165	31.5152	2e-10	ref|XP_002572237.1| protein kinase; titin [Schistosoma mansoni] emb|CAZ28468.1| protein kinase; titin, putative [Schistosoma mansoni]	223	58.7444	7e-71
FG1_Contig30007	651	96	25.7391	I63	MER199549	family I63 unassigned peptidase inhibitors (Homo sapiens) [I63.UPW]	124	26.6129	9e-06	ref|NP_002900.2| regenerating islet-derived 1 alpha precursor [Homo sapiens] sp|P05451.3|REG1A_HUMAN RecName: Full=Lithostathine-1-alpha; AltName: Full=Pancreatic stone protein; Short=PSP; AltName: Full=Pancreatic thread protein; Short=PTP; AltName: Full=Islet of Langerhans regenerating protein; Short=REG; AltName: Full=Regenerating protein I alpha; AltName: Full=Islet cells regeneration factor; …	164	25.6098	9e-06
FG1_Contig16724	635	93	25.563	I43	MER200186	family I43 unassigned peptidase inhibitors (Mus musculus) [I43.UPW]	120	32.5	2e-11	ref|XP_002572237.1| protein kinase; titin [Schistosoma mansoni] emb|CAZ28468.1| protein kinase; titin, putative [Schistosoma mansoni]	137	75.1825	3e-54
FG1_Contig16267	568	83	25.5054	I63	MER111781	family I63 unassigned peptidase inhibitor homologues (Gasterosteus aculeatus) [I63.UNW]	120	29.1667	1e-06	gb|AAX63737.1| carbohydrate-binding calcium-dependent lectin precursor [Schistosoma mansoni]	154	31.8182	2e-12
FG1_Contig17154	675	98	25.341	I63	MER156643	family I63 unassigned peptidase inhibitors (Dipodomys ordii) [I63.UPW]	76	35.5263	4e-07	ref|XP_002577044.1| epidermal growth factor [Schistosoma mansoni] emb|CAZ33281.1| epidermal growth factor, putative [Schistosoma mansoni]	133	40.6015	2e-22
FG1_Contig30486	1063	153	25.1224	I02	MER136531	family I2 unassigned peptidase inhibitors (Branchiostoma floridae) [I02.UPW]	51	56.8627	2e-13	ref|XP_002581275.1| serine-type protease inhibitor [Schistosoma mansoni] emb|CAZ37514.1| serine-type protease inhibitor, putative [Schistosoma mansoni]	309	63.754	1e-121
FG1_Contig34943	344	49	24.8622	I02	MER139135	family I2 unassigned peptidase inhibitor homologues (Sabellastarte magnifica) [I02.UNW]	52	50	2e-10	sp|P84875.1|PCPI_SABMA RecName: Full=Carboxypeptidase inhibitor SmCI emb|CAK55547.1| putative carboxypeptidase inhibitor [Sabellastarte magnifica]	52	50	2e-08
FG1_Contig22013	281	40	24.846	I43	MER200310	family I43 unassigned peptidase inhibitors (Mus musculus) [I43.UPW]	60	48.3333	4e-09	ref|XP_002572237.1| protein kinase; titin [Schistosoma mansoni] emb|CAZ28468.1| protein kinase; titin, putative [Schistosoma mansoni]	93	77.4194	2e-35
FG1_Contig14168	428	60	24.4686	I43	MER200214	family I43 unassigned peptidase inhibitors (Mus musculus) [I43.UPW]	111	46.8468	3e-23	ref|XP_002572237.1| protein kinase; titin [Schistosoma mansoni] emb|CAZ28468.1| protein kinase; titin, putative [Schistosoma mansoni]	135	75.5556	1e-55
FG1_Contig18408	970	135	24.2921	I43	MER199724	family I43 unassigned peptidase inhibitors (Schmidtea mediterranea) [I43.UPW]	157	45.8599	3e-38	gb|ABC61954.1| roboA [Schmidtea mediterranea]	306	39.8693	7e-59
FG1_Contig17698	767	104	23.6668	I43	MER200251	family I43 unassigned peptidase inhibitors (Mus musculus) [I43.UPW]	158	37.9747	1e-22	ref|XP_002572237.1| protein kinase; titin [Schistosoma mansoni] emb|CAZ28468.1| protein kinase; titin, putative [Schistosoma mansoni]	255	65.8824	2e-96
FG1_Contig9992	285	38	23.2724	I63	MER157256	family I63 unassigned peptidase inhibitors (Dipodomys ordii) [I63.UPW]	98	41.8367	2e-20	ref|XP_002575317.1| laminin [Schistosoma mansoni] emb|CAZ31550.1| laminin, putative [Schistosoma mansoni]	94	77.6596	7e-44
FG1_Contig14648	452	60	23.1694	I63	MER156049	family I63 unassigned peptidase inhibitors (Dipodomys ordii) [I63.UPW]	78	48.7179	2e-13	ref|XP_002578919.1| titin [Schistosoma mansoni] emb|CAZ35157.1| titin, putative [Schistosoma mansoni]	150	63.3333	9e-57
FG1_Contig14510	445	59	23.1416	I63	MER145915	family I63 unassigned peptidase inhibitor homologues (Ciona savignyi) [I63.UNW]	104	34.6154	6e-10	ref|XP_002575374.1| hypothetical protein [Schistosoma mansoni] emb|CAZ31607.1| hypothetical protein [Schistosoma mansoni]	147	46.9388	5e-37
FG1_Contig24719	347	45	22.6353	I43	MER201590	family I43 unassigned peptidase inhibitors (Homo sapiens) [I43.UPW]	100	32	2e-11	ref|XP_002580716.1| contactin; neuroglian; septate junction protein [Schistosoma mansoni] emb|CAZ36955.1| contactin; neuroglian; septate junction protein [Schistosoma mansoni]	114	70.1754	2e-45
FG1_Contig16098	554	70	22.0542	I43	MER201721	family I43 unassigned peptidase inhibitors (Rattus norvegicus) [I43.UPW]	118	42.3729	6e-20	ref|XP_002572237.1| protein kinase; titin [Schistosoma mansoni] emb|CAZ28468.1| protein kinase; titin, putative [Schistosoma mansoni]	183	59.0164	5e-62
FG1_Contig32487	368	46	21.8179	I43	MER200316	family I43 unassigned peptidase inhibitors (Mus musculus) [I43.UPW]	79	46.8354	2e-14	ref|XP_002572237.1| protein kinase; titin [Schistosoma mansoni] emb|CAZ28468.1| protein kinase; titin, putative [Schistosoma mansoni]	121	62.8099	4e-38
FG1_Contig14327	435	54	21.6674	I43	MER149009	family I43 unassigned peptidase inhibitor homologues (Ciona intestinalis) [I43.UNW]	133	31.5789	5e-12	ref|XP_544073.2| PREDICTED: similar to CG12002-PA, isoform A [Canis familiaris]	126	33.3333	1e-09
FG1_Contig32224	858	106	21.5636	I43	MER201721	family I43 unassigned peptidase inhibitors (Rattus norvegicus) [I43.UPW]	125	41.6	6e-17	ref|XP_002572237.1| protein kinase; titin [Schistosoma mansoni] emb|CAZ28468.1| protein kinase; titin, putative [Schistosoma mansoni]	285	72.6316	1e-126
FG1_Contig12258	350	42	20.9452	I63	MER148078	family I63 unassigned peptidase inhibitor homologues (Ciona intestinalis) [I63.UNW]	93	37.6344	7e-16	ref|XP_002572968.1| cell polarity protein [Schistosoma mansoni] emb|CAZ29200.1| Crumbs complex protein; cell polarity protein; family S9 non-peptidase homologue (S09 family) [Schistosoma mansoni]	116	49.1379	5e-29
FG1_Contig16799	628	75	20.8451	I63	MER177120	family I63 unassigned peptidase inhibitors (Tetrahymena thermophila) [I63.UPW]	145	27.5862	8e-11	ref|XP_002575382.1| subfamily S8B unassigned peptidase (S08 family) [Schistosoma mansoni] emb|CAZ31615.1| subfamily S8B unassigned peptidase (S08 family) [Schistosoma mansoni]	212	36.7925	9e-35
FG1_Contig13378	392	46	20.4821	I43	MER145860	family I43 unassigned peptidase inhibitor homologues (Ciona savignyi) [I43.UNW]	84	33.3333	2e-06	ref|XP_002572237.1| protein kinase; titin [Schistosoma mansoni] emb|CAZ28468.1| protein kinase; titin, putative [Schistosoma mansoni]	129	75.1938	5e-56
FG1_Contig16475	589	69	20.4473	I63	MER147537	family I63 unassigned peptidase inhibitor homologues (Ciona savignyi) [I63.UNW]	70	35.7143	1e-06	ref|XP_002577044.1| epidermal growth factor [Schistosoma mansoni] emb|CAZ33281.1| epidermal growth factor, putative [Schistosoma mansoni]	117	44.4444	2e-24
FG1_Contig14880	481	56	20.321	I43	MER200201	family I43 unassigned peptidase inhibitors (Mus musculus) [I43.UPW]	122	36.0656	5e-20	ref|XP_002572237.1| protein kinase; titin [Schistosoma mansoni] emb|CAZ28468.1| protein kinase; titin, putative [Schistosoma mansoni]	160	66.25	1e-58
FG1_Contig8490	252	29	20.0863	I63	MER148870	family I63 unassigned peptidase inhibitor homologues (Ciona intestinalis) [I63.UNW]	67	44.7761	1e-09	ref|XP_001653297.1| low-density lipoprotein receptor (ldl) [Aedes aegypti] sp|Q16YE7.1|CUE_AEDAE RecName: Full=Protein cueball; Flags: Precursor gb|EAT39657.1| low-density lipoprotein receptor (ldl) [Aedes aegypti]	82	47.561	3e-13
FG1_Contig15125	482	55	19.9167	I43	MER201713	family I43 unassigned peptidase inhibitors (Rattus norvegicus) [I43.UPW]	104	37.5	1e-16	ref|XP_002572237.1| protein kinase; titin [Schistosoma mansoni] emb|CAZ28468.1| protein kinase; titin, putative [Schistosoma mansoni]	160	66.875	3e-63
FG1_Contig15150	484	55	19.8344	I43	MER201705	family I43 unassigned peptidase inhibitors (Rattus norvegicus) [I43.UPW]	131	38.9313	7e-24	ref|XP_002572237.1| protein kinase; titin [Schistosoma mansoni] emb|CAZ28468.1| protein kinase; titin, putative [Schistosoma mansoni]	159	73.5849	3e-67
FG1_Contig16429	584	66	19.7257	I63	MER148220	family I63 unassigned peptidase inhibitor homologues (Ciona intestinalis) [I63.UNW]	165	27.8788	3e-09	ref|XP_002579792.1| subfamily M23B non-peptidase homologue (M23 family) [Schistosoma mansoni] emb|CAZ36031.1| subfamily M23B non-peptidase homologue (M23 family) [Schistosoma mansoni]	181	34.8066	2e-26
FG1_Contig14903	492	55	19.5119	I43	MER201713	family I43 unassigned peptidase inhibitors (Rattus norvegicus) [I43.UPW]	158	34.1772	1e-21	ref|XP_002572237.1| protein kinase; titin [Schistosoma mansoni] emb|CAZ28468.1| protein kinase; titin, putative [Schistosoma mansoni]	164	75.6098	2e-71
FG1_Contig38442	497	55	19.3156	I63	MER110758	family I63 unassigned peptidase inhibitor homologues (Oryzias latipes) [I63.UNW]	111	25.2252	3e-06	ref|XP_002579792.1| subfamily M23B non-peptidase homologue (M23 family) [Schistosoma mansoni] emb|CAZ36031.1| subfamily M23B non-peptidase homologue (M23 family) [Schistosoma mansoni]	175	27.4286	4e-10
FG1_Contig9878	282	31	19.1873	I43	MER201694	family I43 unassigned peptidase inhibitors (Rattus norvegicus) [I43.UPW]	59	42.3729	5e-09	ref|XP_002572237.1| protein kinase; titin [Schistosoma mansoni] emb|CAZ28468.1| protein kinase; titin, putative [Schistosoma mansoni]	92	71.7391	1e-31
FG1_Contig29345	255	28	19.1655	I63	MER147263	family I63 unassigned peptidase inhibitor homologues (Ciona savignyi) [I63.UNW]	74	47.2973	6e-16	ref|XP_002579398.1| fibrillin-related [Schistosoma mansoni] emb|CAZ35637.1| fibrillin-related [Schistosoma mansoni]	82	50	8e-22
FG1_Contig5298	202	22	19.0096	I43	MER201695	family I43 unassigned peptidase inhibitors (Rattus norvegicus) [I43.UPW]	67	40.2985	4e-06	ref|XP_002577716.1| titin [Schistosoma mansoni] emb|CAZ33954.1| titin, putative [Schistosoma mansoni]	66	51.5152	6e-11
FG1_Contig10713	306	33	18.8233	I43	MER200259	family I43 unassigned peptidase inhibitors (Mus musculus) [I43.UPW]	77	49.3506	5e-14	ref|XP_002572237.1| protein kinase; titin [Schistosoma mansoni] emb|CAZ28468.1| protein kinase; titin, putative [Schistosoma mansoni]	99	67.6768	9e-36
FG1_Contig5677	205	22	18.7314	I04	MER018680	family I4 unassigned peptidase inhibitors (Schistosoma japonicum) [I04.UPW]	62	43.5484	2e-07	ref|XP_002580026.1| serpin [Schistosoma mansoni] emb|CAZ36265.1| serpin [Schistosoma mansoni]	59	47.4576	2e-07
FG1_Contig17224	686	73	18.5738	I63	MER157080	family I63 unassigned peptidase inhibitors (Dipodomys ordii) [I63.UPW]	40	50	5e-08	ref|XP_002573725.1| subfamily M12A unassigned peptidase (M12 family) [Schistosoma mansoni] emb|CAZ29957.1| subfamily M12A unassigned peptidase (M12 family) [Schistosoma mansoni]	228	88.5965	1e-122
FG1_Contig34503	389	41	18.3966	I43	MER200168	family I43 unassigned peptidase inhibitors (Mus musculus) [I43.UPW]	89	39.3258	2e-08	ref|XP_002572237.1| protein kinase; titin [Schistosoma mansoni] emb|CAZ28468.1| protein kinase; titin, putative [Schistosoma mansoni]	129	67.4419	2e-45
FG1_Contig12722	366	38	18.1219	I43	MER200201	family I43 unassigned peptidase inhibitors (Mus musculus) [I43.UPW]	107	42.9907	5e-23	ref|XP_002572237.1| protein kinase; titin [Schistosoma mansoni] emb|CAZ28468.1| protein kinase; titin, putative [Schistosoma mansoni]	119	68.0672	3e-46
FG1_Contig28955	405	41	17.6698	I43	MER201721	family I43 unassigned peptidase inhibitors (Rattus norvegicus) [I43.UPW]	118	35.5932	9e-17	dbj|BAC00784.1| twitchin [Mytilus galloprovincialis]	125	54.4	1e-33
FG1_Contig35268	315	31	17.1772	I63	MER183035	family I63 unassigned peptidase inhibitors (Ochotona princeps) [I63.UPW]	84	41.6667	1e-09	ref|XP_002025805.1| GL18321 [Drosophila persimilis] gb|EDW32701.1| GL18321 [Drosophila persimilis]	65	47.6923	4e-11
FG1_Contig9608	276	27	17.0749	I43	MER200214	family I43 unassigned peptidase inhibitors (Mus musculus) [I43.UPW]	82	35.3659	5e-10	ref|XP_002572237.1| protein kinase; titin [Schistosoma mansoni] emb|CAZ28468.1| protein kinase; titin, putative [Schistosoma mansoni]	91	63.7363	5e-23
FG1_Contig11923	339	33	16.9909	I43	MER157092	family I43 unassigned peptidase inhibitors (Dipodomys ordii) [I43.UPW]	111	31.5315	2e-06	ref|XP_002580716.1| contactin; neuroglian; septate junction protein [Schistosoma mansoni] emb|CAZ36955.1| contactin; neuroglian; septate junction protein [Schistosoma mansoni]	112	75.8929	7e-46
FG1_Contig20150	361	35	16.9224	I01	MER052584	family I1 unassigned peptidase inhibitor homologues (Drosophila melanogaster) [I01.UNW]	48	45.8333	4e-07	emb|CAX72768.1| Solute carrier organic anion transporter family member 5A1 [Schistosoma japonicum]	102	45.098	4e-18
FG1_Contig25218	855	82	16.7398	I63	MER200405	family I63 unassigned peptidase inhibitors (Mus musculus) [I63.UPW]	57	45.614	2e-08	ref|NP_032742.1| Notch gene homolog 3 precursor [Mus musculus] sp|Q61982.1|NOTC3_MOUSE RecName: Full=Neurogenic locus notch homolog protein 3; Short=Notch 3; Contains: RecName: Full=Notch 3 extracellular truncation; Contains: RecName: Full=Notch 3 intracellular domain; Flags: Precursor emb|CAA52776.1| Notch 3 [Mus musculus] gb|EDL40331.1| mCG14251 [Mus musculus] emb|CAQ11934.1| Notch gene homolog…	55	47.2727	7e-06
FG1_Contig33686	328	30	15.9643	I63	MER146793	family I63 unassigned peptidase inhibitor homologues (Ciona savignyi) [I63.UNW]	83	28.9157	3e-08	ref|XP_002576355.1| notch [Schistosoma mansoni] emb|CAZ32592.1| notch [Schistosoma mansoni]	96	39.5833	1e-15
FG1_Contig10295	292	26	15.5415	I43	MER201155	family I43 unassigned peptidase inhibitors (Homo sapiens) [I43.UPW]	80	36.25	1e-08	ref|XP_002577716.1| titin [Schistosoma mansoni] emb|CAZ33954.1| titin, putative [Schistosoma mansoni]	96	56.25	1e-26
FG1_Contig15849	539	46	14.8961	I63	MER176951	family I63 unassigned peptidase inhibitors (Tetrahymena thermophila) [I63.UPW]	71	35.2113	1e-07	ref|XP_002579150.1| tyrosine kinase [Schistosoma mansoni] emb|CAZ35389.1| tyrosine kinase [Schistosoma mansoni]	178	50	5e-49
FG1_500338	258	22	14.8835	I63	MER201194	family I63 unassigned peptidase inhibitors (Bos taurus) [I63.UPW]	61	34.4262	9e-06	ref|XP_002570733.1| Galactose-specific lectin (PAL) [Schistosoma mansoni] emb|CAZ38418.1| Galactose-specific lectin (PAL), putative [Schistosoma mansoni]	87	44.8276	6e-11
FG1_Contig28496	397	33	14.5086	I43	MER156237	family I43 unassigned peptidase inhibitors (Dipodomys ordii) [I43.UPW]	106	35.8491	2e-07	ref|XP_002575523.1| hypothetical protein [Schistosoma mansoni] emb|CAZ31756.1| hypothetical protein [Schistosoma mansoni]	131	80.916	2e-60
FG1_Contig16593	621	51	14.3344	I43	MER149008	family I43 unassigned peptidase inhibitor homologues (Ciona intestinalis) [I43.UNW]	148	33.7838	6e-11	dbj|BAE94190.1| contactin/TAG-1 cell adhesion molecule [Dugesia japonica]	206	39.8058	2e-36
FG1_Contig10323	307	25	14.2136	I43	MER200312	family I43 unassigned peptidase inhibitors (Mus musculus) [I43.UPW]	65	47.6923	1e-12	ref|XP_002572237.1| protein kinase; titin [Schistosoma mansoni] emb|CAZ28468.1| protein kinase; titin, putative [Schistosoma mansoni]	102	66.6667	4e-35
FG1_Contig35218	250	20	13.9634	I43	MER182982	family I43 unassigned peptidase inhibitors (Ochotona princeps) [I43.UPW]	78	42.3077	2e-08	ref|XP_002577717.1| hemicentin [Schistosoma mansoni] emb|CAZ33955.1| hemicentin, putative [Schistosoma mansoni]	75	46.6667	3e-13
FG1_Contig33606	358	28	13.6514	I63	MER148478	family I63 unassigned peptidase inhibitor homologues (Ciona intestinalis) [I63.UNW]	98	42.8571	4e-19	ref|XP_002581307.1| notch [Schistosoma mansoni] emb|CAZ37546.1| notch [Schistosoma mansoni]	117	58.1197	1e-41
FG1_495371	238	18	13.2007	I63	MER183440	family I63 unassigned peptidase inhibitors (Ochotona princeps) [I63.UPW]	55	50.9091	3e-12	ref|XP_002575317.1| laminin [Schistosoma mansoni] emb|CAZ31550.1| laminin, putative [Schistosoma mansoni]	79	74.6835	4e-34
FG1_Contig7862	451	34	13.1584	I63	MER145863	family I63 unassigned peptidase inhibitor homologues (Ciona savignyi) [I63.UNW]	85	42.3529	4e-13	ref|XP_002579398.1| fibrillin-related [Schistosoma mansoni] emb|CAZ35637.1| fibrillin-related [Schistosoma mansoni]	149	63.0872	1e-56
FG1_Contig9334	282	21	12.9979	I43	MER199440	family I43 unassigned peptidase inhibitors (Drosophila grimshawi) [I43.UPW]	97	36.0825	2e-12	ref|XP_002572237.1| protein kinase; titin [Schistosoma mansoni] emb|CAZ28468.1| protein kinase; titin, putative [Schistosoma mansoni]	94	73.4043	1e-38
FG1_Contig10886	309	23	12.9919	I63	MER157485	family I63 unassigned peptidase inhibitors (Dipodomys ordii) [I63.UPW]	105	45.7143	5e-20	ref|XP_002576288.1| laminin beta chain-related [Schistosoma mansoni] emb|CAZ32524.1| laminin beta chain-related [Schistosoma mansoni]	102	79.4118	4e-48
FG1_Contig13593	408	30	12.834	I39	MER170649	family I39 unassigned peptidase inhibitors (Acyrthosiphon pisum) [I39.UPW]	125	30.4	2e-12	ref|XP_002573601.1| hypothetical protein [Schistosoma mansoni] emb|CAZ29833.1| conserved hypothetical protein [Schistosoma mansoni]	135	77.037	9e-55
FG1_Contig26248	259	19	12.8043	I43	MER149036	family I43 unassigned peptidase inhibitor homologues (Ciona intestinalis) [I43.UNW]	69	40.5797	1e-07	ref|XP_002580854.1| neuroglian; septate junction protein [Schistosoma mansoni] emb|CAZ37093.1| neuroglian; septate junction protein [Schistosoma mansoni]	85	76.4706	7e-33
FG1_Contig3956	206	15	12.7094	I43	MER146024	family I43 unassigned peptidase inhibitor homologues (Ciona savignyi) [I43.UNW]	58	39.6552	2e-06	ref|XP_002572237.1| protein kinase; titin [Schistosoma mansoni] emb|CAZ28468.1| protein kinase; titin, putative [Schistosoma mansoni]	68	86.7647	9e-31
FG1_Contig9070	264	19	12.5618	I43	MER200252	family I43 unassigned peptidase inhibitors (Mus musculus) [I43.UPW]	87	31.0345	1e-06	ref|XP_002572237.1| protein kinase; titin [Schistosoma mansoni] emb|CAZ28468.1| protein kinase; titin, putative [Schistosoma mansoni]	87	75.8621	1e-33
FG1_Contig14454	441	31	12.2695	I43	MER183660	family I43 unassigned peptidase inhibitors (Ochotona princeps) [I43.UPW]	91	39.5604	3e-13	ref|XP_002572237.1| protein kinase; titin [Schistosoma mansoni] emb|CAZ28468.1| protein kinase; titin, putative [Schistosoma mansoni]	143	74.8252	8e-58
FG1_Contig11668	467	32	11.9601	I43	MER199966	family I43 unassigned peptidase inhibitors (Mus musculus) [I43.UPW]	141	34.7518	9e-12	ref|XP_002577716.1| titin [Schistosoma mansoni] emb|CAZ33954.1| titin, putative [Schistosoma mansoni]	155	69.0323	7e-57
FG1_Contig32023	219	15	11.955	I63	MER157259	family I63 unassigned peptidase inhibitors (Dipodomys ordii) [I63.UPW]	38	52.6316	2e-06	ref|XP_002578904.1| laminin gamma-1 chain [Schistosoma mansoni] emb|CAZ35142.1| laminin gamma-1 chain,, putative [Schistosoma mansoni]	45	75.5556	1e-14
FG1_Contig12020	342	23	11.7383	I63	MER147054	family I63 unassigned peptidase inhibitor homologues (Ciona savignyi) [I63.UNW]	96	37.5	1e-12	ref|XP_002572968.1| cell polarity protein [Schistosoma mansoni] emb|CAZ29200.1| Crumbs complex protein; cell polarity protein; family S9 non-peptidase homologue (S09 family) [Schistosoma mansoni]	101	56.4356	1e-34
FG1_511998	321	21	11.4187	I43	MER201705	family I43 unassigned peptidase inhibitors (Rattus norvegicus) [I43.UPW]	89	49.4382	3e-19	ref|XP_002572237.1| protein kinase; titin [Schistosoma mansoni] emb|CAZ28468.1| protein kinase; titin, putative [Schistosoma mansoni]	106	89.6226	9e-49
FG1_507404	293	18	10.7228	I63	MER148925	family I63 unassigned peptidase inhibitor homologues (Ciona intestinalis) [I63.UNW]	73	43.8356	2e-12	ref|XP_002576288.1| laminin beta chain-related [Schistosoma mansoni] emb|CAZ32524.1| laminin beta chain-related [Schistosoma mansoni]	96	67.7083	1e-36
FG1_Contig33750	213	13	10.6529	I63	MER183440	family I63 unassigned peptidase inhibitors (Ochotona princeps) [I63.UPW]	53	58.4906	3e-17	ref|XP_001141549.1| PREDICTED: laminin, alpha 1 isoform 1 [Pan troglodytes]	54	59.2593	3e-16
FG1_Contig30403	236	14	10.3542	I63	MER156290	family I63 unassigned peptidase inhibitors (Dipodomys ordii) [I63.UPW]	48	41.6667	5e-06
FG1_492551	230	13	9.86547	I63	MER183411	family I63 unassigned peptidase inhibitors (Ochotona princeps) [I63.UPW]	59	47.4576	2e-11	ref|XP_001867489.1| fibulin 1 [Culex quinquefasciatus] gb|EDS45162.1| fibulin 1 [Culex quinquefasciatus]	74	56.7568	6e-16
FG1_Contig7425	233	13	9.73845	I39	MER172773	family I39 unassigned peptidase inhibitors (Pediculus humanus) [I39.UPW]	68	39.7059	2e-06	ref|XP_002573601.1| hypothetical protein [Schistosoma mansoni] emb|CAZ29833.1| conserved hypothetical protein [Schistosoma mansoni]	30	86.6667	8e-06
FG1_Contig10823	307	17	9.66524	I63	MER147198	family I63 unassigned peptidase inhibitor homologues (Ciona savignyi) [I63.UNW]	61	49.1803	2e-09	ref|XP_545138.2| PREDICTED: similar to HEG homolog 1 [Canis familiaris]	50	60	1e-08
FG1_Contig10822	307	17	9.66524	I63	MER157324	family I63 unassigned peptidase inhibitors (Dipodomys ordii) [I63.UPW]	108	34.2593	2e-09	ref|XP_002575317.1| laminin [Schistosoma mansoni] emb|CAZ31550.1| laminin, putative [Schistosoma mansoni]	101	64.3564	2e-35
FG1_500954	261	14	9.36246	I63	MER157622	family I63 unassigned peptidase inhibitors (Dipodomys ordii) [I63.UPW]	39	46.1538	5e-06	ref|XP_002059128.1| GJ16197 [Drosophila virilis] gb|EDW71186.1| GJ16197 [Drosophila virilis]	30	70	2e-06
FG1_487572	215	11	8.9301	I63	MER157254	family I63 unassigned peptidase inhibitors (Dipodomys ordii) [I63.UPW]	66	42.4242	1e-13	ref|XP_002575317.1| laminin [Schistosoma mansoni] emb|CAZ31550.1| laminin, putative [Schistosoma mansoni]	70	77.1429	6e-29
FG1_Contig36493	260	13	8.72715	I39	MER161610	alpha-2-macroglobulin (Macaca mulatta) [I39.001]	68	38.2353	8e-07	ref|XP_002573601.1| hypothetical protein [Schistosoma mansoni] emb|CAZ29833.1| conserved hypothetical protein [Schistosoma mansoni]	83	80.7229	2e-33
FG1_501310	262	12	7.99433	I43	MER183660	family I43 unassigned peptidase inhibitors (Ochotona princeps) [I43.UPW]	74	43.2432	6e-13	ref|XP_002577717.1| hemicentin [Schistosoma mansoni] emb|CAZ33955.1| hemicentin, putative [Schistosoma mansoni]	86	67.4419	1e-28
FG1_Contig6776	224	10	7.7921	I63	MER182979	family I63 unassigned peptidase inhibitors (Ochotona princeps) [I63.UPW]	66	48.4848	1e-09	ref|XP_002575317.1| laminin [Schistosoma mansoni] emb|CAZ31550.1| laminin, putative [Schistosoma mansoni]	74	62.1622	9e-26
FG1_Contig33150	294	13	7.71789	I43	MER201715	family I43 unassigned peptidase inhibitors (Rattus norvegicus) [I43.UPW]	81	39.5062	6e-10	ref|XP_002577716.1| titin [Schistosoma mansoni] emb|CAZ33954.1| titin, putative [Schistosoma mansoni]	95	71.5789	2e-33
FG1_Contig12697	365	16	7.6512	I43	MER199724	family I43 unassigned peptidase inhibitors (Schmidtea mediterranea) [I43.UPW]	54	53.7037	5e-12	ref|XP_002573906.1| cell adhesion molecule [Schistosoma mansoni] emb|CAZ30139.1| cell adhesion molecule, putative [Schistosoma mansoni]	120	60.8333	2e-38
FG1_Contig9032	386	16	7.23494	I63	MER167610	family I63 unassigned peptidase inhibitors (Branchiostoma floridae) [I63.UPW]	122	42.623	2e-20	ref|XP_002578919.1| titin [Schistosoma mansoni] emb|CAZ35157.1| titin, putative [Schistosoma mansoni]	127	63.7795	2e-49
a Transcriptomic sequences from adult Fasciola gigantica predicted to encode proteins with homology (following BLASTx, E-value <1E-05) to proteases and protease inhibitors within the MEROPS enzyme database (http://merops.sanger.ac.uk/).
b Sequences were further annotated based on their homology (BLASTx, E-value <1E-05) to protein sequences within the NCBI non-redundant database (see Supplementary Table S4)
c Sequences ranked based on their relative level of transcription inferred from the number of mapped raw sequence reads per kilobase per million reads (RPKM).
